# Supplementary material for: Effectiveness of a pharmacist-based gout care management programme in a large integrated health plan: results from a pilot study
Source: PubMed Central journal article supplement — BMJ Open. 2014 Jan 10;4(1):e003627. doi: 10.1136/bmjopen-2013-003627 (PMC3902202; doi:10.1136/bmjopen-2013-003627), 2014-01-10
Supplement: bmjopen-2013-003627.draft_revisions.pdf [file bmjopen-2013-003627.draft_revisions.pdf]

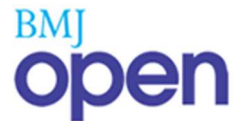

**Effectiveness of a pharmacist-based gout care management program in a large integrated health plan: Results from a pilot study**

|                                 |                                                                                                                                                                                                                                                                                                                                                                                                                                                                               |
|---------------------------------|-------------------------------------------------------------------------------------------------------------------------------------------------------------------------------------------------------------------------------------------------------------------------------------------------------------------------------------------------------------------------------------------------------------------------------------------------------------------------------|
| Journal:                        | <i>BMJ Open</i>                                                                                                                                                                                                                                                                                                                                                                                                                                                               |
| Manuscript ID:                  | bmjopen-2013-003627                                                                                                                                                                                                                                                                                                                                                                                                                                                           |
| Article Type:                   | Research                                                                                                                                                                                                                                                                                                                                                                                                                                                                      |
| Date Submitted by the Author:   | 22-Jul-2013                                                                                                                                                                                                                                                                                                                                                                                                                                                                   |
| Complete List of Authors:       | Goldfien, Robert; Kaiser Permanente Northern California, Department of Rheumatology<br>Avins, Andrew; Kaiser Permanente, Division of Research<br>Pressman, Alice; Kaiser Permanente, Division of Research<br>Jacobson, Alice; Kaiser Permanente, Division of Research<br>Yip, Goldie; Kaiser Permanente, Department of Clinical Pharmacy<br>Ng, Michele; Kaiser Permanente, Department of Clinical Pharmacy<br>Hwe, Alice; Kaiser Permanente, Department of Clinical Pharmacy |
| <b>Primary Subject Heading</b>: | Rheumatology                                                                                                                                                                                                                                                                                                                                                                                                                                                                  |
| Secondary Subject Heading:      | Medical management                                                                                                                                                                                                                                                                                                                                                                                                                                                            |
| Keywords:                       | Rheumatology < INTERNAL MEDICINE, Quality in health care < HEALTH SERVICES ADMINISTRATION & MANAGEMENT, Health economics < HEALTH SERVICES ADMINISTRATION & MANAGEMENT                                                                                                                                                                                                                                                                                                        |
|                                 |                                                                                                                                                                                                                                                                                                                                                                                                                                                                               |

SCHOLARONE™  
Manuscripts

only

1  
2  
3 **Effectiveness of a pharmacist-based gout care management program in a large**  
4 **integrated health plan: Results from a pilot study**  
5  
6  
7  
8  
9  
10

11  
12 Robert D Goldfien<sup>1</sup>, Michele S Ng<sup>2</sup>, Goldie Yip<sup>2</sup>, Alice Hwe<sup>2</sup>, Alice Jacobson<sup>3</sup>, Alice  
13 Pressman<sup>3</sup>, Andrew L Avins<sup>3</sup>  
14  
15  
16  
17  
18  
19  
20  
21

22 <sup>1</sup>Department of Rheumatology, Kaiser Permanente, Richmond, CA USA, <sup>2</sup>Department of  
23 Clinical Pharmacy, and the <sup>3</sup>Division of Research, Kaiser Permanente Oakland, CA  
24  
25  
26  
27  
28  
29  
30  
31

32 Correspondence to:  
33  
34  
35

36 Robert Goldfien, MD  
37

38 Department of Rheumatology  
39

40 Kaiser Permanente Northern California  
41

42 901 Nevin Ave  
43  
44

45 Richmond, CA 94941 USA  
46  
47

48 This work was funded through a Kaiser Permanente Community Benefits Research Grant  
49

50 None of the authors has any potential conflict of interest regarding this work  
51

52 There is no additional data available  
53  
54  
55  
56  
57  
58  
59  
60

## Article Summary

1. Article focus: Hypotheses addressed
  - A structured, goal-directed program is effective in achieving optimal control of serum uric acid levels in patients with recurrent gout.
  - Successful management of recurrent gout can employ a leveraged approach using a pharmacist-staffed protocol with supervision by a rheumatologist.
  - Chronic gout can be managed efficiently, safely and cost-effectively using a telephone-based ‘virtual clinic’.
2. Key messages
  - A protocol based, goal directed gout management program is highly effective in achieving and maintaining serum uric acid control in patients with recurrent gout.
  - Effective urate lowering therapy can be achieved in a high percentage of gout patients using approved doses of allopurinol when dose titration is used.
  - This program appears to be a promising approach to improving gout management and may offer significant efficiency compared to current practice.
3. Strengths and Limitations

Strengths: The population we studied is representative of gout patients seen in general rheumatology practice, and therefore our results should be widely generalizable. Our program is relatively easy to implement and requires only a trained clinical pharmacist and rheumatologist to carry out.

Limitations: Although encouraging, this pilot study does not prove that our gout management program is more effective than usual care for gout because there was no control group. A study testing this hypothesis is needed. The structure of our organization, which integrates the health plan, pharmacy programs and physician care, is optimal for the use of our program. A non-integrated system might lead to barriers in setting up a similar collaboration. This may limit the applicability of the model.

## Abstract

### Background:

The incidence of gout has been steadily rising. While effective treatments are available, treatment is often unsuccessful because current approaches to management lack a systematic approach. To address this shortcoming we tested a protocol-based, pharmacist-staffed intervention to manage patients with recurrent gout.

### Methods:

Patients in Kaiser Permanente, Northern California (KPNC) with recurrent gout were referred by their primary care physicians to a pharmacist-staffed gout management clinic supervised by a board-certified rheumatologist. The pharmacist used a protocol that employs standard gout medications to achieve and maintain a serum uric acid (sUA) level of 6.0 mg/dl or less. Results from the first 100 consecutive patients enrolled in this pilot program are reported here.

### Results:

In 95 evaluable patients enrolled in our pilot program, a sUA of 6.0 mg/dl or less was achieved and maintained in 78 patients with 4 still in the program to date. Five patients declined to participate after referral, and another 13 patients did not complete the program.

### Conclusions:

A structured pharmacist-staffed program can effectively and safely lower and maintain uric acid levels in a high percentage of patients with recurrent gout. This care model is simple to implement, efficient and warrants further validation in a clinical trial.

## Introduction

Gout is the most common inflammatory arthritis in men (1) and results in considerable morbidity and utilization of health care resources. (2) The past 30 years have witnessed a steady increase in the prevalence of gout. (3–5) The causes of this rise in gout prevalence appear to be linked to the increasing prevalence of obesity, diabetes, chronic renal disease and hypertension. (6,7) Unlike other common rheumatic diseases, the underlying cause of gout, chronic elevation of serum uric acid (sUA), is well understood.

Current approaches for management of other common chronic conditions, such as diabetes, are based on the principle that chronic illnesses are best managed by identifying predictors of optimal outcomes, setting treatment targets, and then monitoring for success in treating to the targets. (8) In the case of gout, an appropriate treatment target has been identified by expert panels sponsored by the European League Against Rheumatism (EULAR) (9) and the American College of Rheumatology (ACR). (10) Both recommend that patients with tophaceous or recurrent gout be treated with urate-lowering therapy (ULT) to a target sUA of < 6.0 mg/dl. Unfortunately, only a minority of gout patients receives appropriate treatment, including doses of ULT sufficient to achieve this target. (11) There are several reasons for this deficiency which have been addressed by other authors. (12,13)

To address the problem of inadequate management of gout, we developed a model for gout management consisting of a ‘virtual’ clinic comprised of a clinical pharmacist under the supervision of a board-certified rheumatologist. Following a written protocol, the

1  
2  
3 pharmacist initiates, adjusts and monitors the use of standard gout medications for  
4 patients referred by their primary care physicians for recurrent or tophaceous gout.  
5  
6 Patients are followed by the clinic until they have 2 consecutive target sUA results at  
7  
8 least 3 months apart, and are then discharged back to their usual care. We report here the  
9  
10 outcomes of a pilot program by presenting the outcomes of the first 100 patients referred  
11  
12 to the program.  
13  
14  
15  
16  
17  
18  
19

## 20 **Methods**

### 21 *Patient referral*

22  
23  
24 Patients with gout whose primary care physicians practice at KPNC in Richmond, CA  
25  
26 were eligible for referral to the gout management program. Referral was at the discretion  
27  
28 of the primary care physician (sometimes in consultation with a rheumatologist), based  
29  
30 on the intent to use urate-lowering therapy (ULT). The clinical pharmacist then  
31  
32 telephoned the referred patients, introduced them to the protocol and, if they agreed to  
33  
34 participate, entered them into the program. Patients with end stage renal disease were  
35  
36 excluded from the program. The pharmacist, under a protocol approved by the Kaiser  
37  
38 Permanente East Bay Pharmacy and Therapeutics Committee, was authorized to order  
39  
40 relevant laboratory tests and initiate or change orders for the medications used to manage  
41  
42 sUA, and for flare prophylaxis. For treatment of acute flares, medication orders were  
43  
44 sometimes provided by the rheumatologist if outside the scope of the pharmacy protocol.  
45  
46  
47  
48  
49  
50  
51  
52  
53  
54

### 55 *Laboratory assessment and monitoring*

1  
2  
3 Baseline laboratory assessment performed on all referred patients consisted of a sUA,  
4 alanine aminotransferase (ALT), estimated glomerular filtration rate (eGFR) and  
5 complete blood count (CBC). This same panel of laboratory tests was repeated as needed  
6  
7  
8  
9  
10  
11 to monitor progress while the patient was enrolled in the gout management clinic.  
12

### 13 14 15 *Treatment protocol*

16  
17 Figure 1 is a schematic diagram of the assessment and treatment protocol. Once entered  
18 into the program, baseline laboratory assessment was performed if not available within  
19 the prior month. If, at the time of referral, a patient was being treated for an acute flare of  
20 gout, this treatment was continued and completed. Once a baseline laboratory assessment  
21 was available, ULT was either initiated or adjusted if the sUA was above 6.0 mg/dl. Flare  
22 prophylaxis was used in all cases (see below). After any change in ULT, the patient was  
23 instructed to return for laboratory assessment (sUA, ALT, CBC, eGFR) in 2 weeks, and  
24 report any adverse drug reactions (ADRs) or gout symptoms. ADRs or gout flares were  
25 managed by the clinical pharmacist, usually in consultation with the supervising  
26  
27  
28  
29  
30  
31  
32  
33  
34  
35  
36  
37  
38  
39  
40  
41  
42  
43  
44  
45  
46  
47  
48  
49  
50  
51  
52  
53  
54  
55  
56  
57  
58  
59  
60  
Those not at target were either restarted on their ULT or it was titrated and the level re-  
tested in 2 weeks. Patients remained in the gout management program until they  
demonstrated 2 sUAs  $\leq$  6 mg/dl at least 3 months apart.

### *Pharmacological treatments*

ULT was initiated with allopurinol in all patients as first-line therapy unless the patient had a known ADR or allergy to allopurinol. The starting dose for allopurinol-naïve patients was 100 mg daily (some patients were on higher doses at the time of referral). Dose titration for patients not at target sUA was done using 100 mg per day increments, or in some cases, patients on 300 mg daily were titrated to 450 mg daily. Patients already on febuxostat or probenecid were maintained on these and doses titrated as needed based on sUA. Patients who developed a significant ADR or symptoms of allergy to allopurinol were switched to either febuxostat 40 mg daily or probenecid 500 mg daily, depending on their clinical status in consultation with the rheumatologist. Dose titration was then continued with these drugs if needed.

Gout-flare prophylaxis in most instances utilized colchicine 0.6 mg daily. For patients with eGFR less than 30, the dose was reduced to 0.3 mg per day. In some patients, if recommended by the rheumatologist, a daily nonsteroidal anti-inflammatory drug (NSAID) treatment was substituted, if no contraindication prevented this.

Acute gout flares were managed by the clinical pharmacist, in consultation with the rheumatologist, using oral NSAIDs, prednisone or colchicine.

Adverse drug reactions (ADR) to medications, incident gout flares and abnormal laboratory parameters were recorded by the clinical pharmacist at each telephone encounter and reviewed by the rheumatologist for management.



## Results

Patient demographics and co morbidities of the pilot sample are described in Table 1.

Table 1. Demographic and clinical characteristics of patients (N=100)

| Characteristic                   | Mean (range) |
|----------------------------------|--------------|
| Age, years                       | 61 (32-94)   |
| BMI, kg/m <sup>2</sup>           | 31 (20-48)   |
|                                  | Percent      |
| Male                             | 75%          |
| Hypertension                     | 75%          |
| Chronic kidney disease (CKD 2-4) | 29%          |
| Diabetes                         | 29%          |
| Coronary artery disease          | 10%          |
| Congestive heart failure         | 11%          |
| 2 or more co-morbidities         | 46%          |

Three-fourths of the patients were male. The mean age was 61 years, (range: 32 – 94 years). The mean body mass index was 31 kg/m<sup>2</sup> (range: 20 – 48 kg/m<sup>2</sup>). Common gout-associated co-morbidities were determined based on the presence of specific ICD-9 codes listed in the problem list of each patient in the electronic medical record, and verified by chart review. The majority of patients had at least one of the common co-morbidities associated with gout. Seventy-eight percent had hypertension, 29% had chronic kidney disease (CKD) stage 3 or 4, and 29% had diabetes. A smaller number had either coronary

1  
2  
3 artery disease or congestive heart failure. Forty-five percent of the patients had 2 or more  
4  
5 of these co-morbid conditions.  
6  
7

8  
9  
10 Figure 2 is a schematic that shows the current status of the first 100 patients referred to  
11 our clinic. Five patients declined to participate when initially contacted by the  
12 pharmacist. Thus, 95 patients started the program, and at the time of this analysis, 78 had  
13 completed the program with 2 consecutive sUA measurements of  $< 6.0$  mg/dl, and 4 were  
14 still being managed. Thirteen patients left the program prior to achieving the end point.  
15 Of these, 2 patients died while in the program. One died from complications of  
16 abdominal surgery and the other, aged 94, died at home of “natural causes”. One patient  
17 developed symptoms of an allergic reaction to allopurinol and declined further treatment.  
18 One patient lost insurance coverage, and another was incarcerated. The remaining 8  
19 patients were discharged by the program pharmacist because of a pattern of non-  
20 adherence to treatment or lab monitoring, or because they elected not to complete the  
21 program.  
22  
23  
24  
25  
26  
27  
28  
29  
30  
31  
32  
33  
34  
35  
36  
37  
38  
39  
40

41 Figure 3 shows the sUA's of each patient in the pilot gout-management study as a set of  
42 paired samples. Each pair of bars represents the baseline sUA (red bars) and final sUA  
43 (blue bars) for each patient. For those patients still in the program (i.e., those who have  
44 not yet achieved the discharge criterion of 2 consecutive sUA measurements of  $\leq 6.0$   
45 mg/dl), the blue bar is the most recent sUA available if the patient did not complete the  
46 program. The dotted horizontal line represents the sUA target of 6.0 mg/dl. The figure  
47  
48  
49  
50  
51  
52  
53  
54  
55  
56  
57  
58  
59  
60

1  
2  
3 shows all the patients who entered the program, including those who are still being  
4  
5 managed and those who did not complete the program.  
6  
7  
8  
9

10 To provide a more detailed view of how patients responded to management by the clinic,  
11 we plotted sequential sUA levels in a subset of our patients. Figure 4 shows this analysis  
12 in 20 randomly selected patients entering the program. Each line represents the  
13 sequential sUA measurements of a single patient for a period of 12 months. Essentially  
14 all the patients in this random sample initially responded with significant reduction in  
15 sUA. In many patients, this improvement was sustained, but in others, the sUA  
16 subsequently rose due to discontinuation of ULT. In these patients, the pharmacist was  
17 able, in most cases, to restart ULT and continue testing to assure continuing medication  
18 adherence. The Figure also shows that by 12 months in the program, 16 of the 20  
19 patients had achieved a target sUA and two had a normal sUA of  $< 6.8$  mg/dl.  
20  
21  
22  
23  
24  
25  
26  
27  
28  
29  
30  
31  
32  
33  
34  
35

36 Analysis of the 78 patients who have completed the program after achieving and  
37 maintaining the targeted sUA showed that 68 (87%, 95% CI: 78% to 94%) were on  
38 allopurinol at discharge. Figure 5 shows the distribution of allopurinol doses required to  
39 achieve a sUA of  $\leq 6.0$ . The mean daily allopurinol dose required to achieve a sUA of  $\leq$   
40 6 was 311 mg. Sixty-eight percent of patients on allopurinol achieved target on 300 mg  
41 per day or less. Only three patients achieved goal on the starting dose of 100 mg daily  
42 and two patients required 600 mg per day. All five patients on febuxostat had achieved  
43 the goal sUA level on 40 mg per day.  
44  
45  
46  
47  
48  
49  
50  
51  
52  
53  
54  
55  
56  
57  
58  
59  
60

1  
2  
3 Three patients (3%) experienced rash or other symptoms of allergy to allopurinol. None  
4  
5 required more than discontinuation of the medication. Of these, two patients were  
6  
7 changed to alternative ULT and one patient declined further treatment and discontinued  
8  
9 the program. Elevation of ALT was seen at some time during treatment in 47 patients  
10  
11 (48%), but only 7 of the patients had elevations high enough to require changing  
12  
13 medication. Most stabilized or returned to normal with continued treatment and  
14  
15 monitoring. Incident acute gout flares were reported in 33 patients (34%). None resulted  
16  
17 in discontinuation of ULT. Gastrointestinal side effects were uncommon and in no case  
18  
19 required a change in therapy.  
20  
21  
22  
23  
24  
25  
26

## 27 Discussion

28  
29  
30  
31  
32 Gout is arguably the best understood of the common inflammatory arthritic diseases;  
33  
34 effective preventive therapy is readily available and the key outcome (sUA < 6 mg/dl in  
35  
36 most cases) is easily measured. Why, then, is unsuccessful control of sUA so frequent? A  
37  
38 number of factors contribute to suboptimal gout management. (11,12,14) Adherence to  
39  
40 ULT is poor when compared to medication adherence in other chronic conditions. (15)  
41  
42 Symptoms are typically intermittent with extended gout-free periods. Moreover, there are  
43  
44 effective treatments for gout flares, and medications (for example, colchicine) that can  
45  
46 reduce the incidence of flares without lowering sUA. It is not surprising therefore, that  
47  
48 many gout patients are never started on, or discontinue ULT. Another important feature  
49  
50 of gout management is that initiation of ULT can lead to a short-term increase in  
51  
52 incidence of gout flares, (16) further discouraging the continuation of therapy. Better  
53  
54  
55  
56  
57  
58  
59  
60

1  
2  
3 patient education could be expected to improve long-term medication adherence, but is  
4 not consistently provided. (17) While diet is clearly a factor in the development of gout  
5 (18), patients and physicians frequently place a disproportionate emphasis on dietary  
6 restrictions. (19) Although consensus guidelines recommend treating with ULT to a  
7 target sUA of 6.0 mg/dl or less, concerns about allopurinol toxicity may discourage some  
8 physicians from achieving this goal. In particular, limiting doses of allopurinol in patients  
9 with CKD lead to a high percentage of treatment failures (20). Finally, many clinical  
10 laboratories do not correctly identify serum urate concentrations of > 6.8 mg/dl as being  
11 abnormal. This leads to under-treatment and considerable confusion about diagnosis and  
12 management. (21)  
13  
14  
15  
16  
17  
18  
19  
20  
21  
22  
23  
24  
25  
26  
27  
28

29 Our pilot program was conceived as a way to re-frame the approach to gout management.  
30 We hypothesized that using a structured treat-to-target approach with regular monitoring  
31 and a goal-directed intervention would result in a high percentage of patients achieving a  
32 target sUA. In particular, the protocol was designed to use a slow titration of ULT along  
33 with flare prophylaxis and scheduled follow up calls. We also required sustained control  
34 of sUA for at least 3 months as a way to promote longer term medication adherence.  
35  
36  
37  
38  
39  
40  
41  
42  
43  
44  
45

46 The results of our pilot program suggest that a structured program may be an effective  
47 approach to gout management. ULT medications are highly effective, and therefore  
48 almost all our patients responded with significant reductions in sUA within weeks of  
49 starting the program (Figure 4). Dose titration allowed most patients to achieve a target  
50 sUA of  $\leq 6.0$  mg/dl and to-date, all patients have been able to achieve goal using standard  
51  
52  
53  
54  
55  
56  
57  
58  
59  
60

1  
2  
3 doses of available medications. The demographic and clinical features of the patients in  
4  
5 our gout sample were similar to those seen in the general population of gout patients  
6  
7 described in previous studies, (22,23) suggesting that our findings should be  
8  
9 generalizable to gout populations outside KPNC. A nurse-staffed case management  
10  
11 approach has been used and achieved impressive results in controlling sUA in gout  
12  
13 patients (24). Our pilot program is also based on a structured management approach, but  
14  
15 did not require any clinic visits. This model is highly efficient and therefore suitable for  
16  
17 managing a large population of gout patients.  
18  
19  
20  
21

22  
23  
24 We used a treat-to-target approach and did not limit doses of allopurinol specifically  
25  
26 based on renal function. Current recommendations do not support the need to limit  
27  
28 allopurinol doses to 100 mg daily in patients with CKD, (25–27) though a low starting  
29  
30 dose and slow titration is recommended. (26,28) Indeed, limiting the dose of allopurinol  
31  
32 based on the presence of chronic kidney disease has been shown to result in treatment  
33  
34 failure in an unacceptably high percentage of patients. (17) Our data confirm this  
35  
36 observation: only three of 68 allopurinol-treated patients (4%) completing the program  
37  
38 achieved a sUA of  $\leq 6.0$  on 100 mg daily of allopurinol, and only 68% achieved target  
39  
40 with 300 mg daily (Figure 5).  
41  
42  
43  
44  
45  
46  
47

48 Not surprisingly, we encountered many cases of medication non-adherence. Our protocol,  
49  
50 by requiring two consecutive target sUA levels three months apart, was designed with the  
51  
52 expectation that adherence to ULT would be inconsistent. We do not know whether our  
53  
54 time-limited intervention will ultimately lead to long-term control of sUA in these  
55  
56  
57  
58  
59  
60

1  
2  
3 patients, but we were able to detect medication non-adherence in the first few months and  
4  
5 thus reinforce the importance of long-term ULT. Ideally, monitoring of sUA would  
6  
7 continue on a regular basis, as recommended for relevant laboratory parameters in other  
8  
9 chronic conditions.  
10

11  
12  
13 We designed our pilot to be efficient and cost-effective by leveraging physician time.  
14  
15 The gout management program, while supervised by a rheumatologist, was staffed by a  
16  
17 clinical pharmacist who was carefully trained in the management protocol. The  
18  
19 pharmacist was able to manage a cohort of up to about 80 patients at a time while  
20  
21 spending only about 6-8 hours per week. The time spent in overseeing and assisting the  
22  
23 clinical pharmacist was never more than about 30 minutes per week for the  
24  
25 rheumatologist once the program was in place. Moreover, our program did not require  
26  
27 any in-person visits. This model suggests a path to improved outcomes in gout patients  
28  
29 without generating the magnitude of increased utilization of health care resources that  
30  
31 might otherwise be required.  
32  
33  
34  
35  
36  
37  
38  
39  
40  
41

## 42 **Contributorship Statement**

43  
44 Robert Goldfien

45  
46  
47 Conceived and developed protocol and program. Participated in collection and analysis of  
48  
49 data, and pharmacist supervision. Primary author of manuscript.

50  
51 Andrew Avins

52  
53 Consulted on project design, data capture, statistical methods and manuscript editing.  
54

55  
56 Alice Pressman  
57  
58  
59  
60

1  
2  
3  
4  
5  
6  
7  
8  
9  
10  
11  
12  
13  
14  
15  
16  
17  
18  
19  
20  
21  
22  
23  
24  
25  
26  
27  
28  
29  
30  
31  
32  
33  
34  
35  
36  
37  
38  
39  
40  
41  
42  
43  
44  
45  
46  
47  
48  
49  
50  
51  
52  
53  
54  
55  
56  
57  
58  
59  
60

Oversaw data analysis and presentation. Consulted on data analysis and manuscript editing.

Alice Hwe

Oversaw development and approval of treatment protocol and supervised clinical pharmacists.

Alice Jacobson

Assisted with data collection and analysis.

Michele Ng and Goldie Yip

Worked directly with subjects to arrange data collection, adjust medications, obtain clinical information and report issues or concerns with supervising rheumatologist

**Data sharing**

There are no additional unpublished data from this study.

**Competing Interests**

None

**Funding**

None



## References

1. Lawrence RC, Felson DT, Helmick CG, Arnold LM, Choi H, Deyo RA, et al. Estimates of the prevalence of arthritis and other rheumatic conditions in the United States: Part II. *Arthritis & Rheumatism*. 2008 Jan;58(1):26–35.
2. Krishnan E, Lienesch D, Kwok CK. Gout in ambulatory care settings in the United States. *The Journal of Rheumatology*. 2008 Mar 1;35(3):498–501.
3. Wallace, KL, Riedel, AA, Joseph-Ridge, N, Wortman, R. Increasing prevalence of gout and hyperuricemia over 10 years among older adults in a managed care population. *The Journal of Rheumatology*. 31(8):1582–6.
4. Arromdee E, Michet CJ, Crowson CS, O’Fallon WM, Gabriel SE. Epidemiology of gout: is the incidence rising? *J. Rheumatol*. 2002 Nov;29(11):2403–6.
5. Kramer, HN, Curhan, G. The association between gout and nephrolithiasis: The National Health and Nutrition Examination Survey III. *American Journal of Kidney Diseases*. 40:37–42.
6. Weaver, AL. Epidemiology of gout. *Cleveland Clinic Journal of Medicine*. 2008 Jul;75(Supplement 5):9–12.
7. Annemans, L, Spaepen, E, Gaskin, M et al. Gout in the UK and Germany: prevalence, comorbidities and management in general practice 2000–2005. *Annals of the Rheumatic Diseases*. 2008;67:960–6.
8. Peters AL, Davidson MB. Application of a diabetes managed care program. The feasibility of using nurses and a computer system to provide effective care. *Diabetes Care*. 1998 Jul;21(7):1037–43.
9. Zhang W. EULAR evidence based recommendations for gout. Part II: Management. Report of a task force of the EULAR Standing Committee For International Clinical Studies Including Therapeutics (ESCISIT). *Annals of the Rheumatic Diseases*. 2006 Mar 28;65(10):1312–24.
10. Khanna D, Fitzgerald JD, Khanna PP, Bae S, Singh MK, Neogi T, et al. 2012 American College of Rheumatology guidelines for management of gout. Part 1: Systematic nonpharmacologic and pharmacologic therapeutic approaches to hyperuricemia. *Arthritis Care & Research*. 2012 Oct;64(10):1431–46.
11. Edwards NL. Quality of Care in Patients with Gout: Why is Management Suboptimal and What Can Be Done About It? *Current Rheumatology Reports*. 2010 Dec 14;13(2):154–9.
12. Pascual, E, Sivera, F. Why is gout so poorly managed? *Annals of the Rheumatic Diseases*. 2007;66:1269–70.

13. Singh, JA, Hodges, JS, Toscano, JP, Asch, SM. Quality of care for gout in the US needs improvement. *Arthritis Care & Research*. 2007;57(5):822–9.
14. Becker, MA, Chohan, S. We can make gout management more successful now. *Current Opinion in Rheumatology*. 2008;20:167–72.
15. Briesacher BA, Andrade SE, Fouayzi H, Chan KA. Comparison of Drug Adherence Rates Among Patients with Seven Different Medical Conditions. *Pharmacotherapy*. 2008 Apr;28(4):437–43.
16. Schumacher HR, Becker MA, Lloyd E, MacDonald PA, Lademacher C. Febuxostat in the treatment of gout: 5-yr findings of the FOCUS efficacy and safety study. *Rheumatology*. 2008 Nov 2;48(2):188–94.
17. Harrold LR, Mazor KM, Peterson D, Naz N, Firreno C, Yood RA. Patients' knowledge and beliefs concerning gout and its treatment: a population based study. *BMC Musculoskeletal Disorders*. 2012;13(1):180.
18. Choi HK, Atkinson K, Karlson EW, Willett W, Curhan G. Purine-rich foods, dairy and protein intake, and the risk of gout in men. *N. Engl. J. Med*. 2004 Mar 11;350(11):1093–103.
19. Doherty M, Jansen TL, Nuki G, Pascual E, Perez-Ruiz F, Punzi L, et al. Gout: why is this curable disease so seldom cured? *Annals of the Rheumatic Diseases*. 2012 Aug 3;71(11):1765–70.
20. Dalbeth N, Kumar S, Stamp L, Gow P. Dose adjustment of allopurinol according to creatinine clearance does not provide adequate control of hyperuricemia in patients with gout. *J. Rheumatol*. 2006 Aug;33(8):1646–50.
21. Mandell BF. Confessions of a goutophile: Despite its treatability, gout remains a problem. *Cleve Clin J Med*. 2008 Jul;75 Suppl 5:S1.
22. Kim KY, Ralph Schumacher H, Hunsche E, Wertheimer AI, Kong SX. A literature review of the epidemiology and treatment of acute gout. *Clin Ther*. 2003 Jun;25(6):1593–617.
23. Trifiro G, Morabito P, Cavagna L, Ferrajolo C, Pecchioli S, Simonetti M, et al. Epidemiology of gout and hyperuricaemia in Italy during the years 2005-2009: a nationwide population-based study. *Annals of the Rheumatic Diseases*. 2012 Jun 26;72(5):694–700.
24. Rees F, Jenkins W, Doherty M. Patients with gout adhere to curative treatment if informed appropriately: proof-of-concept observational study. *Annals of the Rheumatic Diseases* [Internet]. 2012 Jun 7 [cited 2013 Apr 12]; Available from: <http://ard.bmj.com/cgi/doi/10.1136/annrheumdis-2012-201676>

- 1
  - 2
  - 3
  - 4
  - 5
  - 6
  - 7
  - 8
  - 9
  - 10
  - 11
  - 12
  - 13
  - 14
  - 15
  - 16
  - 17
  - 18
  - 19
  - 20
  - 21
  - 22
  - 23
  - 24
  - 25
  - 26
  - 27
  - 28
  - 29
  - 30
  - 31
  - 32
  - 33
  - 34
  - 35
  - 36
  - 37
  - 38
  - 39
  - 40
  - 41
  - 42
  - 43
  - 44
  - 45
  - 46
  - 47
  - 48
  - 49
  - 50
  - 51
  - 52
  - 53
  - 54
  - 55
  - 56
  - 57
  - 58
  - 59
  - 60
25. Stamp LK, O'Donnell JL, Zhang M, James J, Frampton C, Barclay ML, et al. Using allopurinol above the dose based on creatinine clearance is effective and safe in patients with chronic gout, including those with renal impairment. *Arthritis & Rheumatism*. 2011 Feb;63(2):412–21.
26. Chao J, Terkeltaub R. A critical reappraisal of allopurinol dosing, safety, and efficacy for hyperuricemia in gout. *Current Rheumatology Reports*. 2009 Mar 22;11(2):135–40.
27. Kim SC, Newcomb C, Margolis D, Roy J, Hennessy S. Severe Cutaneous Reactions Requiring Hospitalization in Allopurinol Initiators: A Population-Based Cohort Study. *Arthritis Care & Research*. 2013 Apr;65(4):578–84.
28. Dalbeth N, Stamp L. Allopurinol Dosing in Renal Impairment: Walking the Tightrope Between Adequate Urate Lowering and Adverse Events. *Seminars in Dialysis*. 2007 Apr 17;20(5):391–5.

Figures

Fig. 1 Clinic monitoring and treatment flow diagram

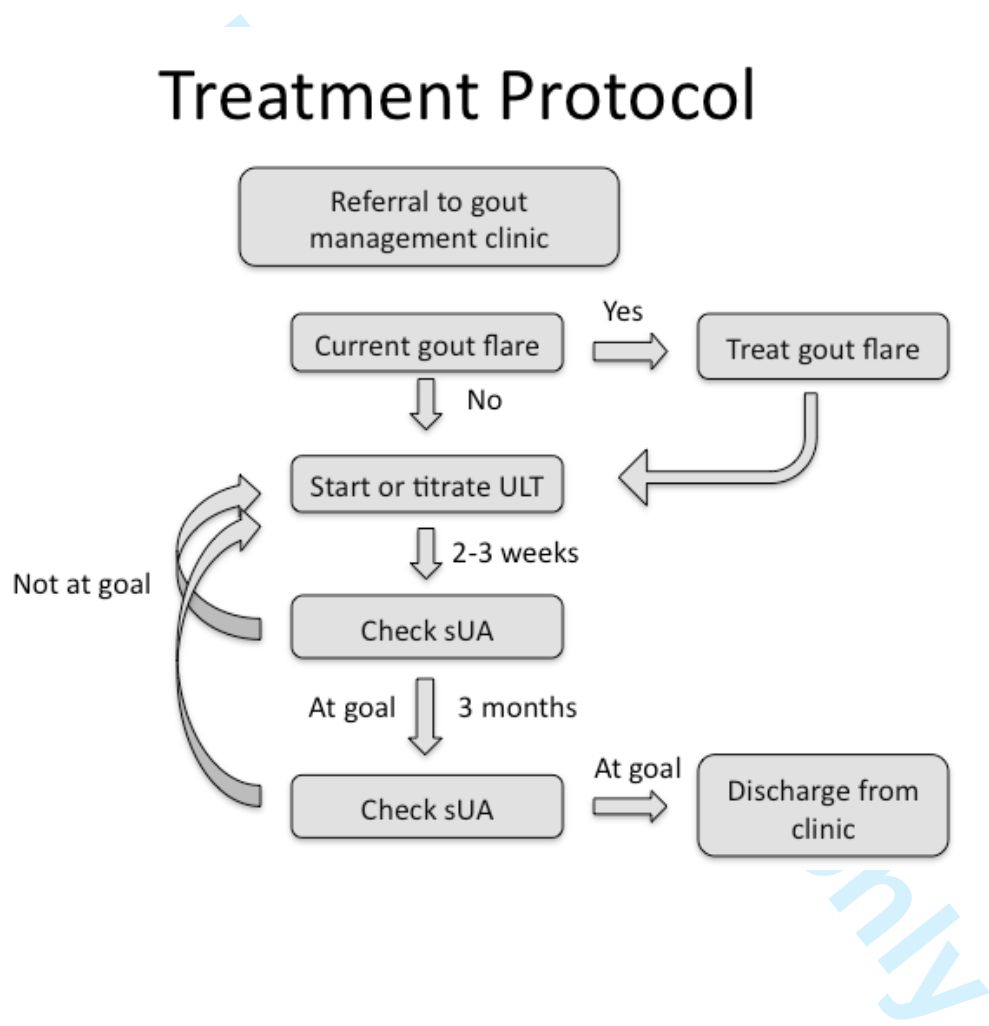

Fig. 2 Current status of first 100 patients referred to program

## Current Patient Status

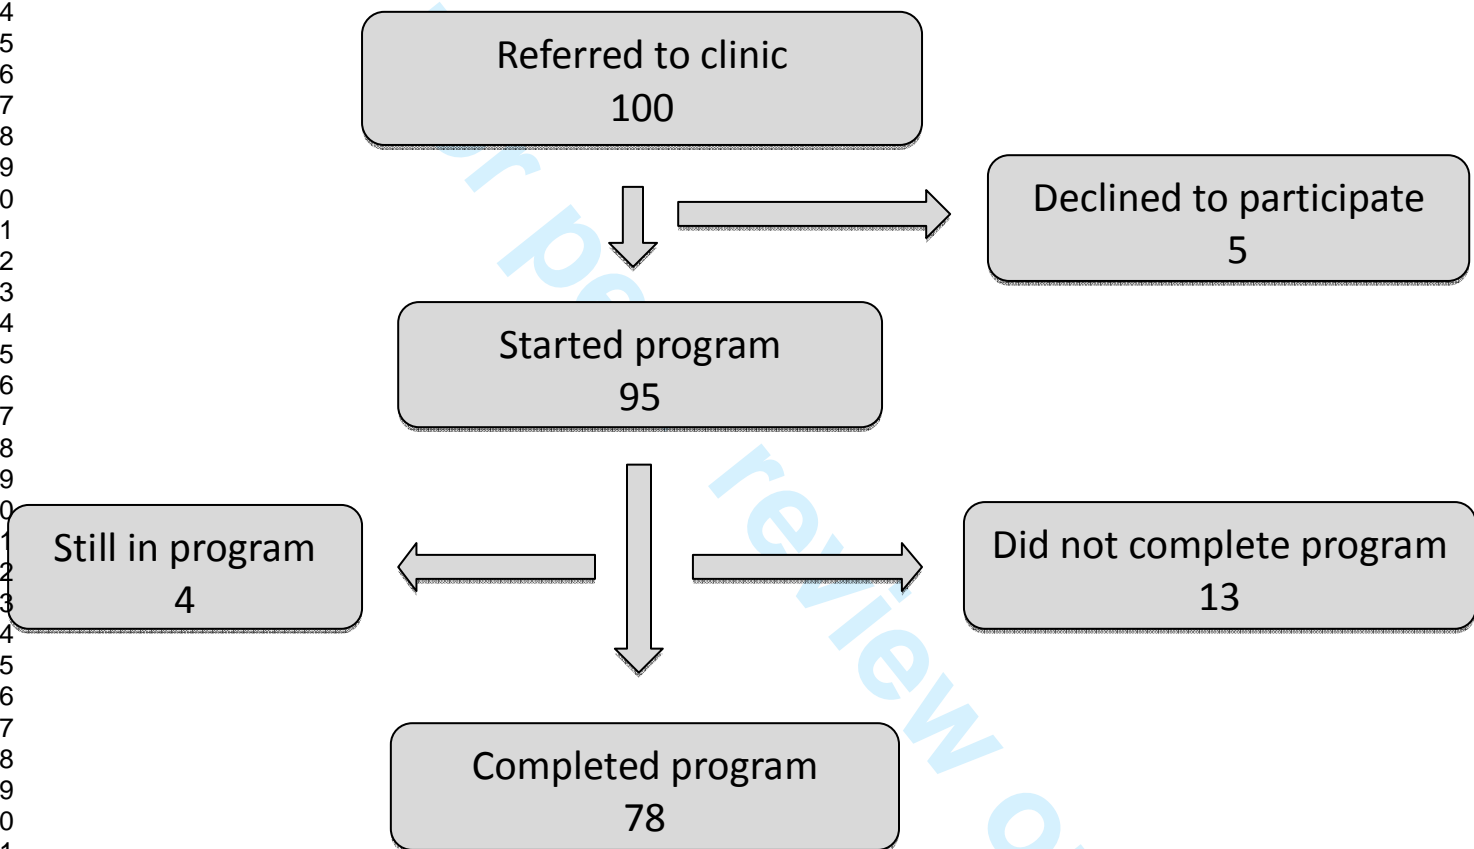

Fig. 3 Comparison of pre-treatment sUA and most recent or final sUA. Each patient is represented by a red bar (initial sUA) and a blue bar (final sUA, whether or not he/she completed the program).

### sUA Pairs: First and Last

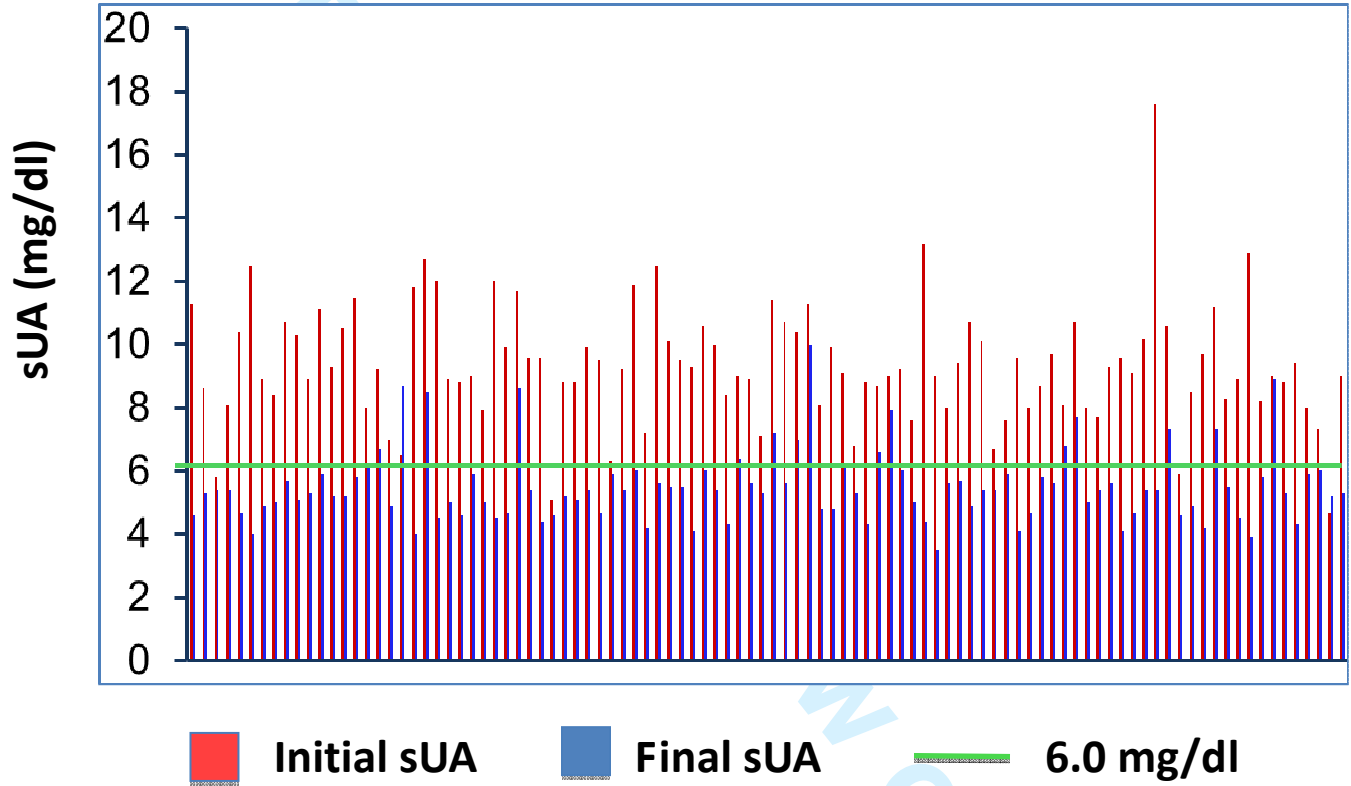

Fig. 4 sUA trend lines for 20 randomly selected patients. Each colored line represents sequential sUA levels in a single patient. Each line stops at the time of clinic discharge or is the most recent sUA if the patient had not completed or left the program.

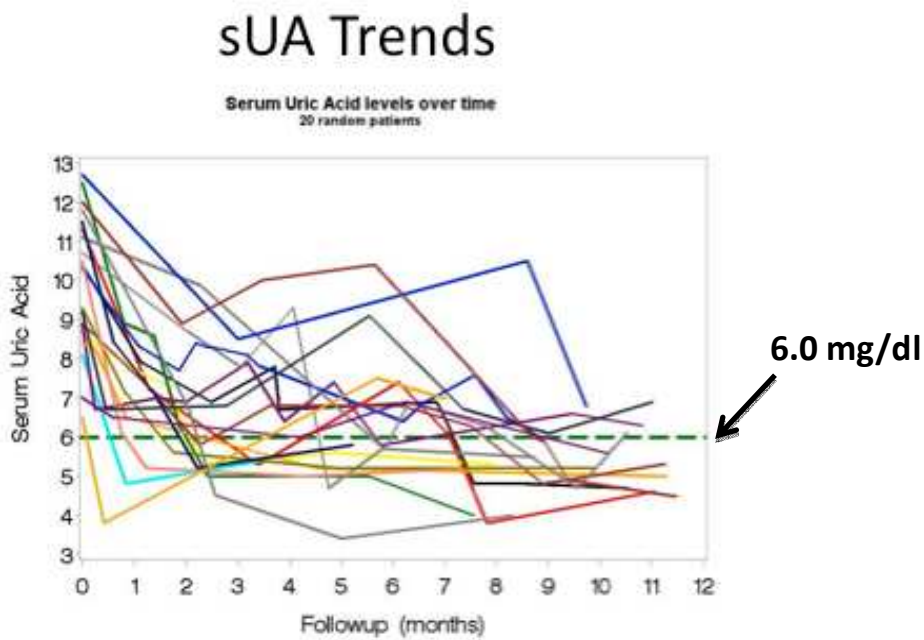

ew only

1  
2  
3  
4  
5  
6  
7  
8  
9  
10  
11  
12  
13  
14  
15  
16  
17  
18  
19  
20  
21  
22  
23  
24  
25  
26  
27  
28  
29  
30  
31  
32  
33  
34  
35  
36  
37  
38  
39  
40  
41  
42  
43  
44  
45  
46  
47  
48  
49  
50  
51  
52  
53  
54  
55  
56  
57  
58  
59  
60

Fig. 5 Dose of Allopurinol required to achieve a sUA of  $\leq 6.0$  mg/dl

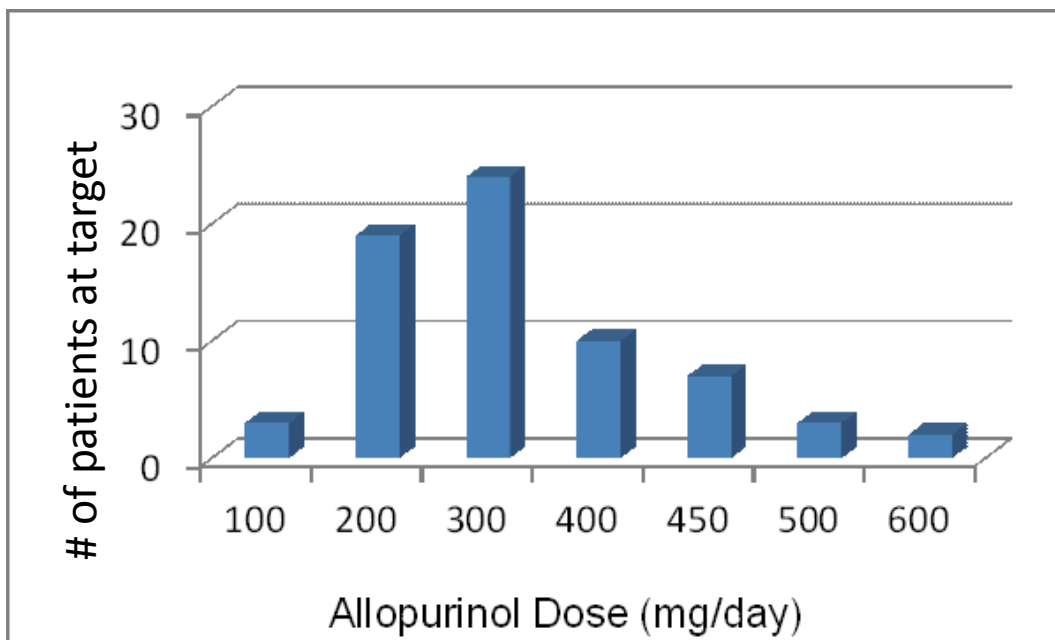

Review only





**Effectiveness of a pharmacist-based gout care management program in a large integrated health plan: Results from a pilot study**

|                                 |                                                                                                                                                                                                                                                                                                                                                                                                                                                                               |
|---------------------------------|-------------------------------------------------------------------------------------------------------------------------------------------------------------------------------------------------------------------------------------------------------------------------------------------------------------------------------------------------------------------------------------------------------------------------------------------------------------------------------|
| Journal:                        | <i>BMJ Open</i>                                                                                                                                                                                                                                                                                                                                                                                                                                                               |
| Manuscript ID:                  | bmjopen-2013-003627.R1                                                                                                                                                                                                                                                                                                                                                                                                                                                        |
| Article Type:                   | Research                                                                                                                                                                                                                                                                                                                                                                                                                                                                      |
| Date Submitted by the Author:   | 25-Oct-2013                                                                                                                                                                                                                                                                                                                                                                                                                                                                   |
| Complete List of Authors:       | Goldfien, Robert; Kaiser Permanente Northern California, Department of Rheumatology<br>Avins, Andrew; Kaiser Permanente, Division of Research<br>Pressman, Alice; Kaiser Permanente, Division of Research<br>Jacobson, Alice; Kaiser Permanente, Division of Research<br>Yip, Goldie; Kaiser Permanente, Department of Clinical Pharmacy<br>Ng, Michele; Kaiser Permanente, Department of Clinical Pharmacy<br>Hwe, Alice; Kaiser Permanente, Department of Clinical Pharmacy |
| <b>Primary Subject Heading</b>: | Rheumatology                                                                                                                                                                                                                                                                                                                                                                                                                                                                  |
| Secondary Subject Heading:      | Medical management                                                                                                                                                                                                                                                                                                                                                                                                                                                            |
| Keywords:                       | Rheumatology < INTERNAL MEDICINE, Quality in health care < HEALTH SERVICES ADMINISTRATION & MANAGEMENT, Health economics < HEALTH SERVICES ADMINISTRATION & MANAGEMENT                                                                                                                                                                                                                                                                                                        |
|                                 |                                                                                                                                                                                                                                                                                                                                                                                                                                                                               |

SCHOLARONE™  
Manuscripts

only

1  
2  
3 **Effectiveness of a pharmacist-based gout care management program in a large**  
4  
5 **integrated health plan: Results from a pilot study**  
6  
7  
8  
9  
10

11  
12 Robert D Goldfien<sup>1</sup>, Michele S Ng<sup>2</sup>, Goldie Yip<sup>2</sup>, Alice Hwe<sup>2</sup>, Alice Jacobson<sup>3</sup>, Alice  
13 Pressman<sup>3</sup>, Andrew L Avins<sup>3</sup>  
14  
15  
16  
17  
18  
19  
20  
21

22 <sup>1</sup>Department of Rheumatology, Kaiser Permanente, Richmond, CA USA, <sup>2</sup>Department of  
23 Clinical Pharmacy, and the <sup>3</sup>Division of Research, Kaiser Permanente Oakland, CA  
24  
25  
26  
27  
28  
29  
30  
31

32 Correspondence to:  
33  
34  
35

36 Robert Goldfien, MD  
37

38 Department of Rheumatology  
39

40 Kaiser Permanente Northern California  
41

42 901 Nevin Ave  
43  
44

45 Richmond, CA 94941 USA  
46  
47

48 This work was funded through a Kaiser Permanente Community Benefits Research Grant  
49

50 None of the authors has any potential conflict of interest regarding this work  
51

52 There is no additional data available  
53  
54  
55  
56  
57  
58  
59  
60

## Abstract

### Objectives:

The study objective was to determine the feasibility of using a pharmacist-staffed, protocol-based structured approach to improving the management of chronic, recurrent gout.

### Setting:

The study was carried out in the outpatient clinic of a single Kaiser Permanente medical center.

This is a community based clinic.

### Participants:

We report on one hundred consecutive patients between the ages of 21 and 94 (75% male) with chronic or recurrent gout, referred by their primary physicians for the purpose of management of urate lowering therapy. Patients with Stage 5 chronic kidney disease or end-stage kidney disease were excluded.

### Interventions:

The program consisted of a trained clinical pharmacist and a rheumatologist. The pharmacist contacted each patient by phone, provided educational and dietary materials, and used a protocol that employs standard gout medications to achieve and maintain a serum uric acid (sUA) level of 6.0 mg/dl or less. Incident gout flares or adverse reactions to medications were managed in consultation with the rheumatologist.

### Primary outcome measure:

The primary outcome measure was the achievement and maintenance of a serum uric acid of 6.0 or less for a period of at least 3 months.

### Results:

In 95 evaluable patients enrolled in our pilot program, a sUA of 6.0 mg/dl or less was achieved and maintained in 78 patients with 4 still in the program to date. Five patients declined to participate after referral, and another 13 patients did not complete the program. (The majority of these were due to non-adherence.)

### Conclusions:

A structured pharmacist-staffed program can effectively and safely lower and maintain uric acid

1  
2  
3 levels in a high percentage of patients with recurrent gout in a primary care setting. This care  
4  
5 model is simple to implement, efficient and warrants further validation in a clinical trial.  
6  
7  
8  
9  
10

## 11 12 13 14 15 16 17 **Introduction**

18  
19 Gout is the most common inflammatory arthritis in men (1) and results in considerable  
20  
21 morbidity and utilization of health care resources. (2) The past 30 years have witnessed a  
22  
23 steady increase in the prevalence of gout. (3–5) The causes of this rise in gout prevalence  
24  
25 appear to be linked to the increasing prevalence of obesity, diabetes, chronic renal disease  
26  
27 and hypertension. (6,7) Unlike other common rheumatic diseases, the underlying cause of  
28  
29 gout, chronic elevation of serum uric acid (sUA), is well understood.  
30  
31  
32  
33  
34  
35

36 Current approaches for management of other common chronic conditions, such as  
37  
38 diabetes, are based on the principle that chronic illnesses are best managed by identifying  
39  
40 predictors of optimal outcomes, setting treatment targets, and then monitoring for success  
41  
42 in treating to the targets. (8) In the case of gout, an appropriate treatment target has been  
43  
44 identified by expert panels sponsored by the European League Against Rheumatism  
45  
46 (EULAR) (9) and the American College of Rheumatology (ACR). (10) Both recommend  
47  
48 that patients with tophaceous or recurrent gout be treated with urate-lowering therapy  
49  
50 (ULT) to a target sUA of < 6.0 mg/dl. Unfortunately, only a minority of gout patients  
51  
52 receives appropriate treatment, including doses of ULT sufficient to achieve this target.  
53  
54  
55  
56  
57 (11) There are several reasons for this deficiency which have been addressed by other  
58  
59  
60

1  
2  
3 authors. (12,13). The reasons cited have included lack of appropriate monitoring, failure  
4  
5 to treat to target and fear of escalation of ULT in some patients, particularly patients with  
6  
7 chronic kidney disease. Taken together, it appears that there is a great need for improved  
8  
9 approaches to the management of gout.  
10  
11

12  
13  
14 To address the problem of inadequate management of gout, we developed a model for  
15  
16 gout management consisting of a 'virtual' clinic comprised of a clinical pharmacist under  
17  
18 the supervision of a board-certified rheumatologist. Following a written protocol, the  
19  
20 pharmacist initiates, adjusts and monitors the use of standard gout medications for  
21  
22 patients referred by their primary care physicians for recurrent or tophaceous gout.  
23  
24

25  
26 Patients are followed by the clinic until they have 2 consecutive target sUA results at  
27  
28 least 3 months apart, and are then discharged back to their usual care. We report here the  
29  
30 results of a pilot program by presenting the outcomes of the first 100 patients referred to  
31  
32 the program. Though a limited intervention, our intent was to address some of the issues  
33  
34 identified in the literature and do it in a way that is highly leveraged and potentially  
35  
36 suitable for a large majority of patients with chronic gout who are currently not being  
37  
38 adequately managed.  
39  
40  
41  
42  
43  
44

## 45 46 **Methods**

### 47 48 49 *Patient referral*

50  
51 Patients with gout whose primary care physicians practice at KPNC in Richmond, CA  
52  
53 were eligible for referral to the gout management program. Referral was at the discretion  
54  
55  
56  
57  
58  
59  
60

1  
2  
3 of the primary care physician (sometimes in consultation with a rheumatologist), based  
4  
5 on a history of recurrent or tophaceous gout and the intent to use urate-lowering therapy  
6  
7 (ULT). Referring physicians were offered the choice of referring each patient for a  
8  
9 formal rheumatology consultation, or to the gout management program, supervised by the  
10  
11 same rheumatologist (RG). The clinical pharmacist then telephoned the referred patients,  
12  
13 introduced them to the protocol and, if they agreed to participate, entered them into the  
14  
15 program. Patients consenting to treatment in the program were provided written  
16  
17 educational material including dietary guidelines at the time of program entry. Patients  
18  
19 with end stage renal disease were excluded from the program. The pharmacist, under a  
20  
21 protocol approved by the Kaiser Permanente East Bay Pharmacy and Therapeutics  
22  
23 Committee, was authorized to order relevant laboratory tests and initiate or change orders  
24  
25 for the medications used to manage sUA, and for flare prophylaxis. For treatment of  
26  
27 acute flares, medication orders were sometimes provided by the rheumatologist if outside  
28  
29 the scope of the pharmacy protocol.  
30  
31  
32  
33  
34  
35  
36  
37  
38

#### 39 *Laboratory assessment and monitoring*

40  
41 Baseline laboratory assessment performed on all referred patients consisted of a sUA,  
42  
43 alanine aminotransferase (ALT), estimated glomerular filtration rate (eGFR) and  
44  
45 complete blood count (CBC). This same panel of laboratory tests was repeated as needed  
46  
47 to monitor progress while the patient was enrolled in the gout management clinic.  
48  
49  
50

#### 51 *Treatment protocol*

52  
53  
54  
55  
56  
57  
58  
59  
60

1  
2  
3 Figure 1 is a schematic diagram of the assessment and treatment protocol. Once entered  
4 into the program, baseline laboratory assessment was performed if not available within  
5 the prior month. If, at the time of referral, a patient was being treated for an acute flare of  
6 gout, this treatment was continued and completed. Once a baseline laboratory assessment  
7 was available, ULT was either initiated or adjusted if the sUA was above 6.0 mg/dl. Flare  
8 prophylaxis was used in all cases (see below). After any change in ULT, the patient was  
9 instructed to return for laboratory assessment (sUA, ALT, CBC, eGFR) in 2 weeks, and  
10 report any adverse drug reactions (ADRs) or gout symptoms. ADRs or gout flares were  
11 managed by the clinical pharmacist, usually in consultation with the supervising  
12 rheumatologist. This process was continued in an iterative fashion until a target sUA of  $\leq$   
13 6.0 mg/dl was achieved. Patients at target were asked to repeat the laboratory assessment  
14 in 3 months. At that time, patients still at target were discharged from the clinic and  
15 instructed to continue their medications and follow up with their primary care physician.  
16 Those not at target were either restarted on their ULT or it was titrated and the level re-  
17 tested in 2 weeks. Patients remained in the gout management program until they  
18 demonstrated 2 sUAs  $\leq$  6 mg/dl at least 3 months apart.

#### 43 *Pharmacological treatments*

44  
45 ULT was initiated with allopurinol in all patients as first-line therapy unless the patient  
46 had a known ADR or allergy to allopurinol. The starting dose for allopurinol-naïve  
47 patients was 100 mg daily (some patients were on higher doses at the time of referral).  
48 Dose titration for patients not at target sUA was done using 100 mg per day increments,  
49 or in some cases, although selected patients on 300 mg daily were titrated to 450 mg  
50  
51  
52  
53  
54  
55  
56  
57  
58  
59  
60

1  
2  
3 daily. The maximum allopurinol dose used in the program was 600 mg per day. Patients  
4  
5 already on febuxostat or probenecid were maintained on these and doses titrated as  
6  
7 needed based on sUA. Patients who developed a significant ADR or symptoms of  
8  
9 allergy to allopurinol were switched to either febuxostat 40 mg daily or probenecid 500  
10  
11 mg daily, depending on their clinical status in consultation with the rheumatologist. Dose  
12  
13 titration was then continued with these drugs if needed.  
14  
15

16  
17  
18  
19  
20 Gout-flare prophylaxis was used in all patients and in most instances we utilized  
21  
22 colchicine 0.6 mg daily. For patients with eGFR less than 30, the dose was reduced to 0.3  
23  
24 mg per day. In some patients, if recommended by the rheumatologist, a daily  
25  
26 nonsteroidal anti-inflammatory drug (NSAID) treatment was substituted, if no  
27  
28 contraindication prevented this.  
29  
30  
31

32  
33  
34 Acute gout flares were managed by the clinical pharmacist, in consultation with the  
35  
36 rheumatologist, using oral NSAIDs, prednisone or colchicine.  
37  
38  
39

40  
41 Adverse drug reactions (ADR) to medications, incident gout flares and abnormal  
42  
43 laboratory parameters were recorded by the clinical pharmacist at each telephone  
44  
45 encounter and reviewed by the rheumatologist for management.  
46  
47  
48

## 49 50 **Results**

51  
52  
53  
54  
55 Patient demographics and co morbidities of the pilot sample are described in Table 1.  
56  
57  
58  
59  
60



Table 1. Demographic and clinical characteristics of patients (N=100)

| Characteristic                   | Mean (range) |
|----------------------------------|--------------|
| Age, years                       | 61 (32-94)   |
| BMI, kg/m <sup>2</sup>           | 31 (20-48)   |
|                                  | Percent      |
| Male                             | 75%          |
| Hypertension                     | 75%          |
| Chronic kidney disease (CKD 2-4) | 29%          |
| Diabetes                         | 29%          |
| Coronary artery disease          | 10%          |
| Congestive heart failure         | 11%          |
| 2 or more co-morbidities         | 46%          |

Three-fourths of the patients were male. The mean age was 61 years, (range: 32 – 94 years). The mean body mass index was 31 kg/m<sup>2</sup> (range: 20 – 48 kg/m<sup>2</sup>). Common gout-associated co-morbidities were determined based on the presence of specific ICD-9 codes listed in the problem list of each patient in the electronic medical record, and verified by chart review. The majority of patients had at least one of the common co-morbidities associated with gout. Seventy-eight percent had hypertension, and 29% had chronic kidney disease (CKD). Of these, 2 had stage 2 CKD, 22 had stage 3 CKD and 3 had stage 4 CKD. Another 29% had diabetes. A smaller number had either coronary artery disease or congestive heart failure. Forty-five percent of the patients had 2 or more of these co-morbid conditions.

1  
2  
3 Figure 2 is a schematic that shows the current status of the first 100 patients referred to  
4 our clinic. Five patients declined to participate when initially contacted by the  
5 pharmacist. Thus, 95 patients started the program, and at the time of this analysis, 78 had  
6 completed the program with 2 consecutive sUA measurements of  $< 6.0$  mg/dl, and 4 were  
7 still being managed. Thirteen patients left the program prior to achieving the end point.  
8 Of these, 2 patients died while in the program. One died from complications of  
9 abdominal surgery and the other, aged 94, died at home of “natural causes”. One patient  
10 developed symptoms of an allergic reaction to allopurinol and declined further treatment.  
11 One patient lost insurance coverage, and another was incarcerated. The remaining 8  
12 patients were discharged by the program pharmacist because of a pattern of non-  
13 adherence to treatment or lab monitoring, or because they elected not to complete the  
14 program. The time patients spent under program management varied considerably. The  
15 mean duration of participation was 47.8 weeks (range 14.9-109.6 weeks). Although our  
16 program was a feasibility study and designed as a short term intervention, when we  
17 examined the medical records of the 78 patients who have successfully completed the  
18 program, we found that 63 of these had been tested at least one time by their regular  
19 physician after clinic discharge (mean follow up time 36 weeks) and that 53 of these  
20 (80%) still maintained a sUA of 6.0 or less.  
21  
22  
23  
24  
25  
26  
27  
28  
29  
30  
31  
32  
33  
34  
35  
36  
37  
38  
39  
40  
41  
42  
43  
44  
45  
46  
47

48 Figure 3 shows the sUA's of each patient in the pilot gout-management study as a set of  
49 paired samples. Each pair of bars represents the baseline sUA (red bars) and final sUA  
50 (blue bars) for each patient. For those patients still in the program (i.e., those who have  
51 not yet achieved the discharge criterion of 2 consecutive sUA measurements of  $\leq 6.0$   
52  
53  
54  
55  
56  
57  
58  
59  
60

1  
2  
3 mg/dl), the blue bar is the most recent sUA available if the patient did not complete the  
4  
5 program. The dotted horizontal line represents the sUA target of 6.0 mg/dl. The figure  
6  
7 shows all the patients who entered the program, including those who are still being  
8  
9 managed and those who did not complete the program.  
10  
11

12  
13  
14  
15 To provide a more detailed view of how patients responded to management by the clinic,  
16  
17 we plotted sequential sUA levels in a subset of our patients. Figure 4 shows this analysis  
18  
19 in 20 randomly selected patients entering the program. Each line represents the  
20  
21 sequential sUA measurements of a single patient for a period of 12 months. Essentially  
22  
23 all the patients in this random sample initially responded with significant reduction in  
24  
25 sUA. In many patients, this improvement was sustained, but in others, the sUA  
26  
27 subsequently rose due to discontinuation of ULT. In these patients, the pharmacist was  
28  
29 able, in most cases, to restart ULT and continue testing to assure continuing medication  
30  
31 adherence. The Figure also shows that by 12 months in the program, 16 of the 20  
32  
33 patients had achieved a target sUA and two had a normal sUA of < 6.8 mg/dl.  
34  
35  
36  
37  
38  
39

40  
41 Analysis of the 78 patients who have completed the program after achieving and  
42  
43 maintaining the targeted sUA showed that 68 (87%, 95% CI: 78% to 94%) were on  
44  
45 allopurinol at discharge. Figure 5 shows the distribution of allopurinol doses required to  
46  
47 achieve a sUA of  $\leq 6.0$ . The mean daily allopurinol dose required to achieve a sUA of  $\leq$   
48  
49 6 was 311 mg. Sixty-eight percent of patients on allopurinol achieved target on 300 mg  
50  
51 per day or less. Only three patients achieved goal on the starting dose of 100 mg daily  
52  
53  
54  
55  
56  
57  
58  
59  
60

1  
2  
3 and two patients required 600 mg per day. All five patients on febuxostat had achieved  
4  
5 the goal sUA level on 40 mg per day.  
6  
7

8  
9  
10 Three patients (3%) experienced rash or other symptoms of allergy to allopurinol. None  
11  
12 required more than discontinuation of the medication. Of these, two patients were  
13  
14 changed to alternative ULT and one patient declined further treatment and discontinued  
15  
16 the program. Elevation of ALT was seen at some time during treatment in 47 patients  
17  
18 (48%), but only 7 of the patients had elevations high enough to require changing  
19  
20 medication. Most stabilized or returned to normal with continued treatment and  
21  
22 monitoring. Incident acute gout flares were reported in 33 patients (34%). None resulted  
23  
24 in discontinuation of ULT. Gastrointestinal side effects were uncommon and in no case  
25  
26 required a change in therapy.  
27  
28  
29  
30  
31  
32  
33

### 34 **Discussion**

35  
36  
37  
38 Gout is arguably the best understood of the common inflammatory arthritic diseases;  
39  
40 effective preventive therapy is readily available and the key outcome (sUA < 6 mg/dl in  
41  
42 most cases) is easily measured. Why, then, is unsuccessful control of sUA so frequent? A  
43  
44 number of factors contribute to suboptimal gout management. (11,12,14) Adherence to  
45  
46 ULT is poor when compared to medication adherence in other chronic conditions. (15)  
47  
48 Symptoms are typically intermittent with extended gout-free periods. Moreover, there are  
49  
50 effective treatments for gout flares, and medications (for example, colchicine) that can  
51  
52 reduce the incidence of flares without lowering sUA. It is not surprising therefore, that  
53  
54  
55  
56  
57  
58  
59  
60

1  
2  
3 many gout patients are never started on, or discontinue ULT. Another important feature  
4  
5 of gout management is that initiation of ULT can lead to a short-term increase in  
6  
7 incidence of gout flares, (16) further discouraging the continuation of therapy. Better  
8  
9 patient education could be expected to improve long-term medication adherence, but is  
10  
11 not consistently provided. (17) While diet is clearly a factor in the development of gout  
12  
13 (18), patients and physicians frequently place a disproportionate emphasis on dietary  
14  
15 restrictions. (19) Although consensus guidelines recommend treating with ULT to a  
16  
17 target sUA of 6.0 mg/dl or less, concerns about allopurinol toxicity may discourage some  
18  
19 physicians from achieving this goal. In particular, limiting doses of allopurinol in patients  
20  
21 with CKD lead to a high percentage of treatment failures (20). Finally, many clinical  
22  
23 laboratories do not correctly identify serum urate concentrations of > 6.8 mg/dl as being  
24  
25 abnormal. This leads to under-treatment and considerable confusion about diagnosis and  
26  
27 management. (21)  
28  
29  
30  
31  
32  
33  
34  
35

36 Our pilot program was conceived as a way to re-frame the approach to gout management.  
37  
38 We hypothesized that using a structured treat-to-target approach with regular monitoring  
39  
40 and a goal-directed intervention would result in a high percentage of patients achieving a  
41  
42 target sUA. In particular, the protocol was designed to use a slow titration of ULT along  
43  
44 with flare prophylaxis and scheduled follow up calls. We also required sustained control  
45  
46 of sUA for at least 3 months as a way to promote longer term medication adherence. We  
47  
48 realize that maintaining treatment for 3 months does not guarantee long term control of  
49  
50 sUA. Nevertheless, of the patients for whom a follow up test was available, 80% were  
51  
52  
53  
54  
55  
56  
57  
58  
59  
60

1  
2  
3 still at target a mean of 36.8 weeks after clinic discharge. As for any chronic condition,  
4  
5 optimal outcomes will require some level of structured monitoring.  
6  
7

8  
9  
10 The results of our pilot program suggest that a structured program may be an effective  
11  
12 approach to gout management. ULT medications are highly effective, and therefore  
13  
14 almost all our patients responded with significant reductions in sUA within weeks of  
15  
16 starting the program (Figure 4). Dose titration allowed most patients to achieve a target  
17  
18 sUA of  $\leq 6.0$  mg/dl and to-date, all patients have been able to achieve goal using standard  
19  
20 doses of available medications. The demographic and clinical features of the patients in  
21  
22 our gout sample were similar to those seen in the general population of gout patients  
23  
24 described in previous studies, (22) suggesting that our findings should be generalizable to  
25  
26 gout populations outside KPNC. A nurse-staffed case management approach has been  
27  
28 used and achieved impressive results in controlling sUA in gout patients (23). Our pilot  
29  
30 program is also based on a structured management approach, but did not require any  
31  
32 clinic visits. This model is highly efficient and therefore suitable for managing a large  
33  
34 population of gout patients, but not necessarily more effective than a case management  
35  
36 approach.  
37  
38  
39  
40  
41  
42  
43  
44

45  
46 There is ample evidence that therapeutic inertia contributes to inadequate results of ULT  
47  
48 (24). Our program was designed specifically to counter this problem by including  
49  
50 repeated sUA measurements and specified actions based on the results. In addition, our  
51  
52 protocol did not limit doses of allopurinol specifically based on renal function, which has  
53  
54 been one of several impediments noted in the literature to successful ULT. Current  
55  
56  
57  
58  
59  
60

1  
2  
3 recommendations do not support the need to limit allopurinol doses to 100 mg daily in  
4 patients with CKD, (25–27) though a low starting dose and slow titration is  
5 recommended. (26,28) Indeed, limiting the dose of allopurinol based on the presence of  
6 chronic kidney disease has been shown to result in treatment failure in an unacceptably  
7 high percentage of patients. (17) Our data confirm this observation: only three of 68  
8 allopurinol-treated patients (4%) completing the program achieved a sUA of  $\leq 6.0$  on  
9 100 mg daily of allopurinol, and only 68% achieved target with 300 mg daily (Figure 5).

10  
11  
12  
13  
14  
15  
16  
17  
18  
19  
20  
21  
22 Not surprisingly, we encountered many cases of medication non-adherence. In most  
23 cases, this was detected in the course of the routine testing that comprised the protocol.  
24 Typically a patient whose sUA was at or near target, had a repeat test that was no longer  
25 at target. In some cases, non-adherence was discovered at the time the patient called to  
26 pharmacist because of a gout flare. Our protocol, by requiring two consecutive target  
27 sUA levels three months apart, was designed with the expectation that adherence to ULT  
28 would be inconsistent. As noted previously, we do not know whether our time-limited  
29 intervention will ultimately lead to long-term control of sUA in these patients, but we  
30 were able to detect medication non-adherence in the first few months and thus reinforce  
31 the importance of long-term ULT. Ideally, monitoring of sUA would continue on a  
32 regular basis, as recommended for relevant laboratory parameters in other chronic  
33 conditions. Despite the fact that all patients were prescribed colchicine or NSAIDs for  
34 flare prophylaxis, we encountered a substantial number of gout flares during the program.  
35 While some increase in flares may be expected, in our experience, many of the flares in  
36 our patients occurred in connection with medication non-adherence. This tendency of  
37  
38  
39  
40  
41  
42  
43  
44  
45  
46  
47  
48  
49  
50  
51  
52  
53  
54  
55  
56  
57  
58  
59  
60

1  
2  
3 gout patients to discontinue ULT accounted for the wide range of times patients had to  
4 stay under management. We provided our patients with written educational material as  
5 well, but could not evaluate the effectiveness of this.  
6  
7  
8  
9

10  
11 We designed our pilot to be efficient and cost-effective by leveraging physician time.  
12  
13 The gout management program, while supervised by a rheumatologist, was staffed by a  
14 clinical pharmacist who was carefully trained in the management protocol. The  
15 pharmacist was able to manage a cohort of up to about 80 patients at a time while  
16 spending only about 6-8 hours per week. The time spent in overseeing and assisting the  
17 clinical pharmacist was never more than about 30 minutes per week for the  
18 rheumatologist once the program was in place. Moreover, our program did not require  
19 any in-person visits. This model suggests a path to improved outcomes in gout patients  
20 without generating the magnitude of increased utilization of health care resources that  
21 might otherwise be required. We recognize that pharmacists may not be available or  
22 allowed to manage patients as was done in our protocol. Even so, a trained clinical nurse  
23 could be substituted in the pharmacist's role and provide excellent care while leveraging  
24 physician time.  
25  
26  
27  
28  
29  
30  
31  
32  
33  
34  
35  
36  
37  
38  
39  
40  
41  
42  
43  
44  
45  
46  
47  
48  
49  
50  
51  
52  
53  
54  
55  
56  
57  
58  
59  
60



## Contributorship Statement

### Robert Goldfien

Conceived and developed protocol and program. Participated in collection and analysis of data, and pharmacist supervision. Primary author of manuscript.

### Andrew Avins

Consulted on project design, data capture, statistical methods and manuscript editing.

### Alice Pressman

Oversaw data analysis and presentation. Consulted on data analysis and manuscript editing.

### Alice Hwe

Oversaw development and approval of treatment protocol and supervised clinical pharmacists.

### Alice Jacobson

Assisted with data collection and analysis.

### Michele Ng and Goldie Yip

Worked directly with subjects to arrange data collection, adjust medications, obtain clinical information and report issues or concerns with supervising rheumatologist

### **Data sharing**

There are no additional unpublished data from this study.

### **Funding**

None

### **Competing Interests**

None

## References

1. Lawrence RC, Felson DT, Helmick CG, Arnold LM, Choi H, Deyo RA, et al. Estimates of the prevalence of arthritis and other rheumatic conditions in the United States: Part II. *Arthritis & Rheumatism*. 2008 Jan;58(1):26–35.
2. Krishnan E, Lienesch D, Kwok CK. Gout in ambulatory care settings in the United States. *The Journal of Rheumatology*. 2008 Mar 1;35(3):498–501.
3. Wallace, KL, Riedel, AA, Joseph-Ridge, N, Wortman, R. Increasing prevalence of gout and hyperuricemia over 10 years among older adults in a managed care population. *The Journal of Rheumatology*. 31(8):1582–6.
4. Arromdee E, Michet CJ, Crowson CS, O’Fallon WM, Gabriel SE. Epidemiology of gout: is the incidence rising? *J. Rheumatol*. 2002 Nov;29(11):2403–6.
5. Kramer, HN, Curhan, G. The association between gout and nephrolithiasis: The National Health and Nutrition Examination Survey III. *American Journal of Kidney Diseases*. 40:37–42.
6. Weaver, AL. Epidemiology of gout. *Cleveland Clinic Journal of Medicine*. 2008 Jul;75(Supplement 5):9–12.
7. Annemans, L, Spaepen, E, Gaskin, M et al. Gout in the UK and Germany: prevalence, comorbidities and management in general practice 2000–2005. *Annals of the Rheumatic Diseases*. 2008;67:960–6.
8. Peters AL, Davidson MB. Application of a diabetes managed care program. The feasibility of using nurses and a computer system to provide effective care. *Diabetes Care*. 1998 Jul;21(7):1037–43.
9. Zhang W. EULAR evidence based recommendations for gout. Part II: Management. Report of a task force of the EULAR Standing Committee For International Clinical Studies Including Therapeutics (ESCISIT). *Annals of the Rheumatic Diseases*. 2006 Mar 28;65(10):1312–24.
10. Khanna D, Fitzgerald JD, Khanna PP, Bae S, Singh MK, Neogi T, et al. 2012 American College of Rheumatology guidelines for management of gout. Part 1: Systematic nonpharmacologic and pharmacologic therapeutic approaches to hyperuricemia. *Arthritis Care & Research*. 2012 Oct;64(10):1431–46.
11. Edwards NL. Quality of Care in Patients with Gout: Why is Management Suboptimal and What Can Be Done About It? *Current Rheumatology Reports*. 2010 Dec 14;13(2):154–9.
12. Pascual, E, Sivera, F. Why is gout so poorly managed? *Annals of the Rheumatic Diseases*. 2007;66:1269–70.

13. Singh, JA, Hodges, JS, Toscano, JP, Asch, SM. Quality of care for gout in the US needs improvement. *Arthritis Care & Research*. 2007;57(5):822–9.
14. Becker, MA, Chohan, S. We can make gout management more successful now. *Current Opinion in Rheumatology*. 2008;20:167–72.
15. Briesacher BA, Andrade SE, Fouayzi H, Chan KA. Comparison of Drug Adherence Rates Among Patients with Seven Different Medical Conditions. *Pharmacotherapy*. 2008 Apr;28(4):437–43.
16. Schumacher HR, Becker MA, Lloyd E, MacDonald PA, Lademacher C. Febuxostat in the treatment of gout: 5-yr findings of the FOCUS efficacy and safety study. *Rheumatology*. 2008 Nov 2;48(2):188–94.
17. Choi HK, Atkinson K, Karlson EW, Willett W, Curhan G. Purine-rich foods, dairy and protein intake, and the risk of gout in men. *N. Engl. J. Med*. 2004 Mar 11;350(11):1093–103.
18. Doherty M, Jansen TL, Nuki G, Pascual E, Perez-Ruiz F, Punzi L, et al. Gout: why is this curable disease so seldom cured? *Annals of the Rheumatic Diseases*. 2012 Aug 3;71(11):1765–70.
19. Dalbeth N, Kumar S, Stamp L, Gow P. Dose adjustment of allopurinol according to creatinine clearance does not provide adequate control of hyperuricemia in patients with gout. *J. Rheumatol*. 2006 Aug;33(8):1646–50.
20. Mandell BF. Confessions of a goutophile: Despite its treatability, gout remains a problem. *Cleve Clin J Med*. 2008 Jul;75 Suppl 5:S1.
21. Kim KY, Ralph Schumacher H, Hunsche E, Wertheimer AI, Kong SX. A literature review of the epidemiology and treatment of acute gout. *Clin Ther*. 2003 Jun;25(6):1593–617.
22. Trifiro G, Morabito P, Cavagna L, Ferrajolo C, Pecchioli S, Simonetti M, et al. Epidemiology of gout and hyperuricaemia in Italy during the years 2005-2009: a nationwide population-based study. *Annals of the Rheumatic Diseases*. 2012 Jun 26;72(5):694–700.
23. Rees F, Jenkins W, Doherty M. Patients with gout adhere to curative treatment if informed appropriately: proof-of-concept observational study. *Annals of the Rheumatic Diseases* [Internet]. 2012 Jun 7 [cited 2013 Apr 12]; Available from: <http://ard.bmj.com/cgi/doi/10.1136/annrhumdis-2012-201676>
24. Liote F, Choi H. Managing gout needs more than drugs: “Il faut le savoir-faire, l’Art et la maniere”. *Annals of the Rheumatic Diseases*. 2013 May 10;72(6):791–3.
25. Stamp LK, O’Donnell JL, Zhang M, James J, Frampton C, Barclay ML, et al. Using allopurinol above the dose based on creatinine clearance is effective and safe in

1  
2  
3 patients with chronic gout, including those with renal impairment. *Arthritis &*  
4 *Rheumatism*. 2011 Feb;63(2):412–21.  
5

- 6  
7 26. Chao J, Terkeltaub R. A critical reappraisal of allopurinol dosing, safety, and  
8 efficacy for hyperuricemia in gout. *Current Rheumatology Reports*. 2009 Mar  
9 22;11(2):135–40.  
10  
11 27. Kim SC, Newcomb C, Margolis D, Roy J, Hennessy S. Severe Cutaneous Reactions  
12 Requiring Hospitalization in Allopurinol Initiators: A Population-Based Cohort  
13 Study. *Arthritis Care & Research*. 2013 Apr;65(4):578–84.  
14  
15 28. Dalbeth N, Stamp L. Allopurinol Dosing in Renal Impairment: Walking the  
16 Tightrope Between Adequate Urate Lowering and Adverse Events. *Seminars in*  
17 *Dialysis*. 2007 Apr 17;20(5):391–5.  
18  
19  
20  
21  
22  
23  
24  
25  
26  
27  
28  
29  
30  
31  
32  
33  
34  
35  
36  
37  
38  
39  
40  
41  
42  
43  
44  
45  
46  
47  
48  
49  
50  
51  
52  
53  
54  
55  
56  
57  
58  
59  
60

Figures

Fig. 1 Clinic monitoring and treatment flow diagram

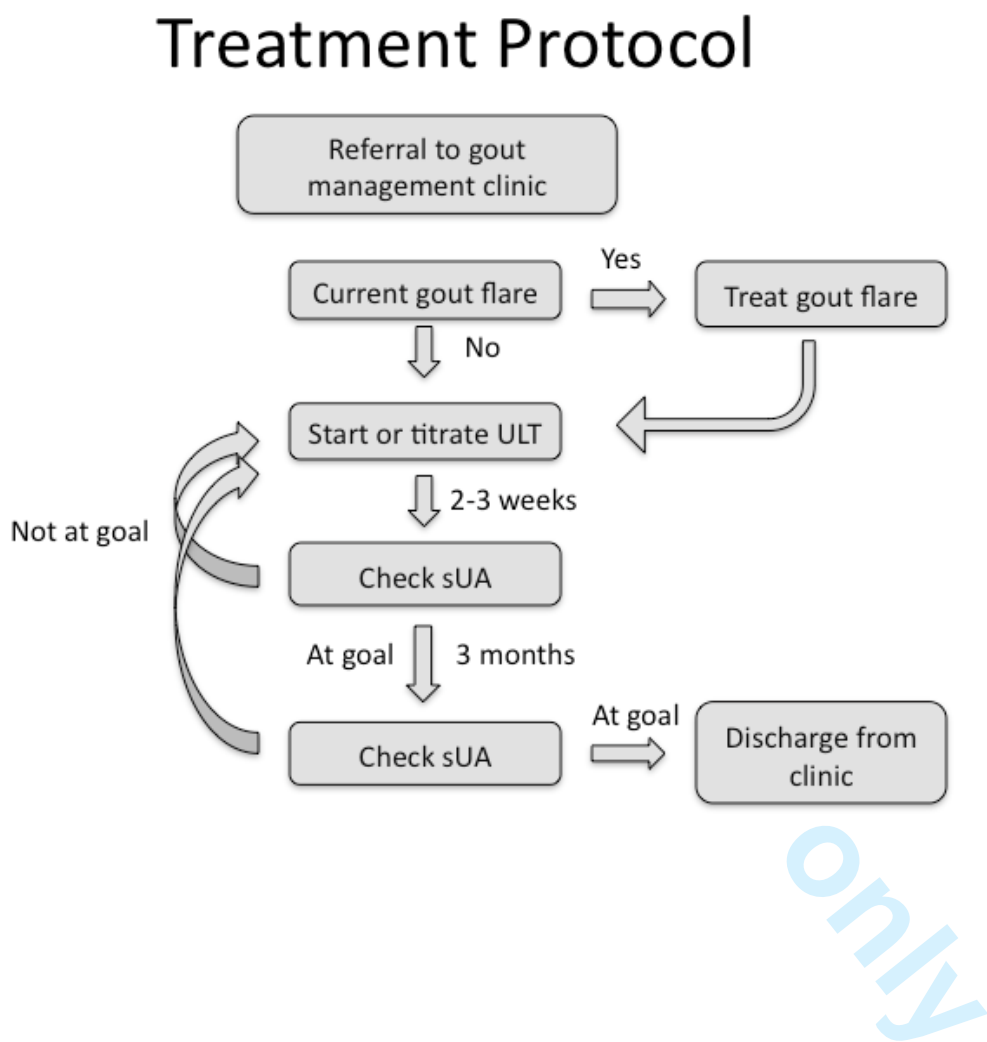

Fig. 2 Current status of first 100 patients referred to program

1  
2  
3  
4  
5  
6  
7  
8  
9  
10  
11  
12  
13  
14  
15  
16  
17  
18  
19  
20  
21  
22  
23  
24  
25  
26  
27  
28  
29  
30  
31  
32  
33  
34  
35  
36  
37  
38  
39  
40  
41  
42  
43  
44  
45  
46  
47  
48  
49  
50  
51  
52  
53  
54  
55  
56  
57  
58  
59  
60

# Current Patient Status

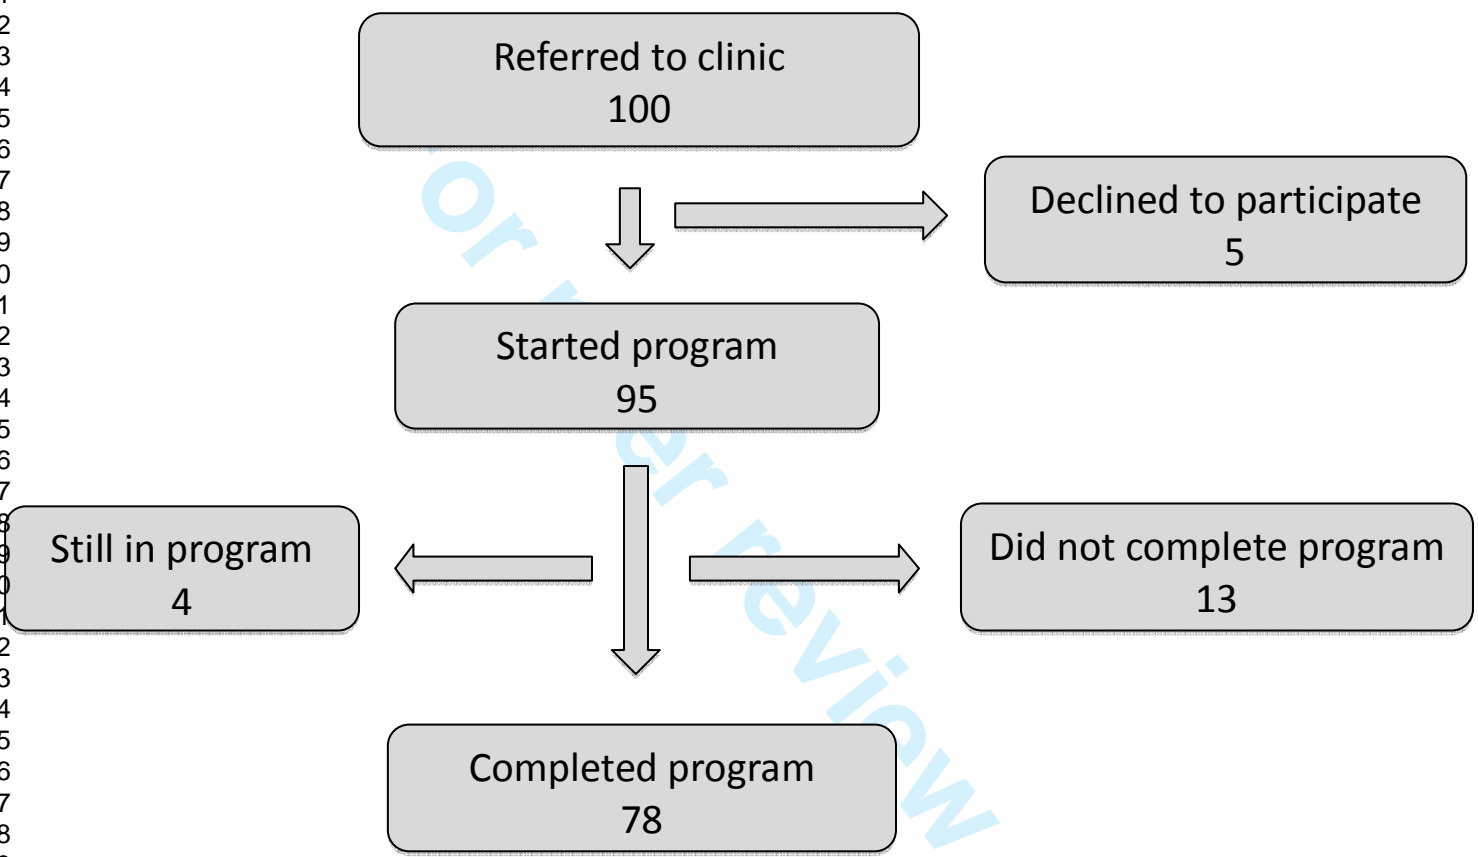

Fig. 3 Comparison of pre-treatment sUA and most recent or final sUA. Each patient is represented by a red bar (initial sUA) and a blue bar (final sUA, whether or not he/she completed the program).

### sUA Pairs: First and Last

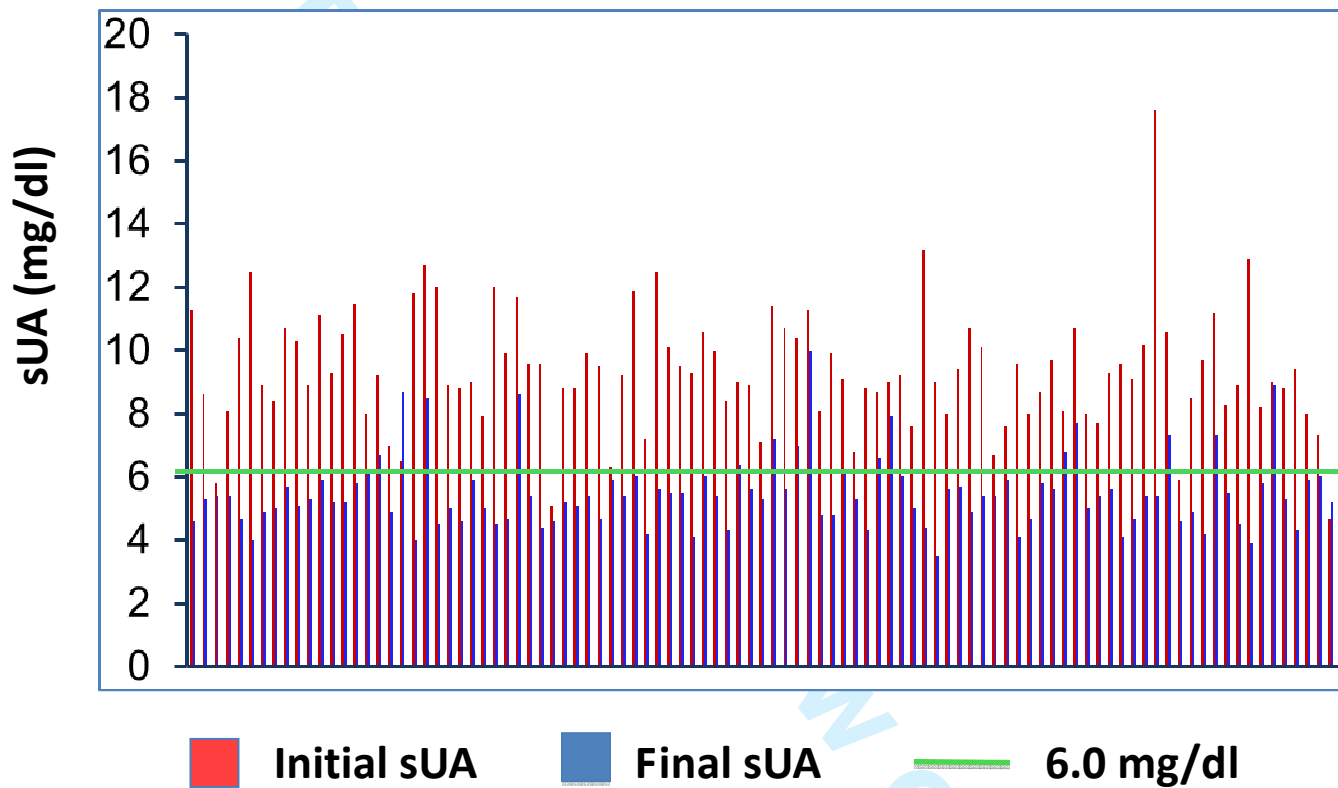

1  
2  
3  
4  
5  
6  
7  
8  
9  
10  
11  
12  
13  
14  
15  
16  
17  
18  
19  
20  
21  
22  
23  
24  
25  
26  
27  
28  
29  
30  
31  
32  
33  
34  
35  
36  
37  
38  
39  
40  
41  
42  
43  
44  
45  
46  
47  
48  
49  
50  
51  
52  
53  
54  
55  
56  
57  
58  
59  
60

Fig. 4 sUA trend lines for 20 randomly selected patients. Each colored line represents sequential sUA levels in a single patient. Each line stops at the time of clinic discharge or is the most recent sUA if the patient had not completed or left the program.

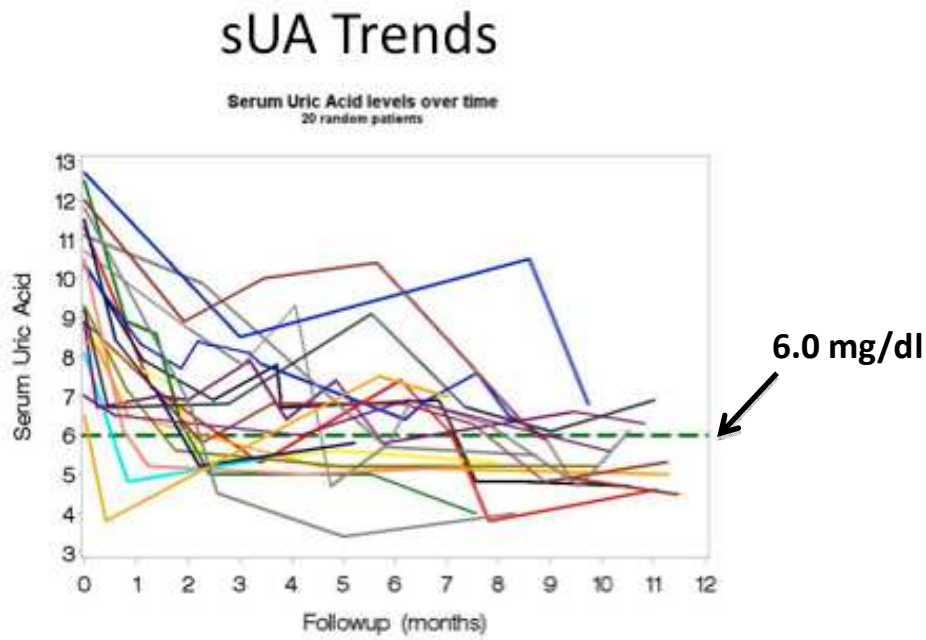

ew only



Fig. 5 Dose of Allopurinol required to achieve a sUA of  $\leq 6.0$  mg/dl

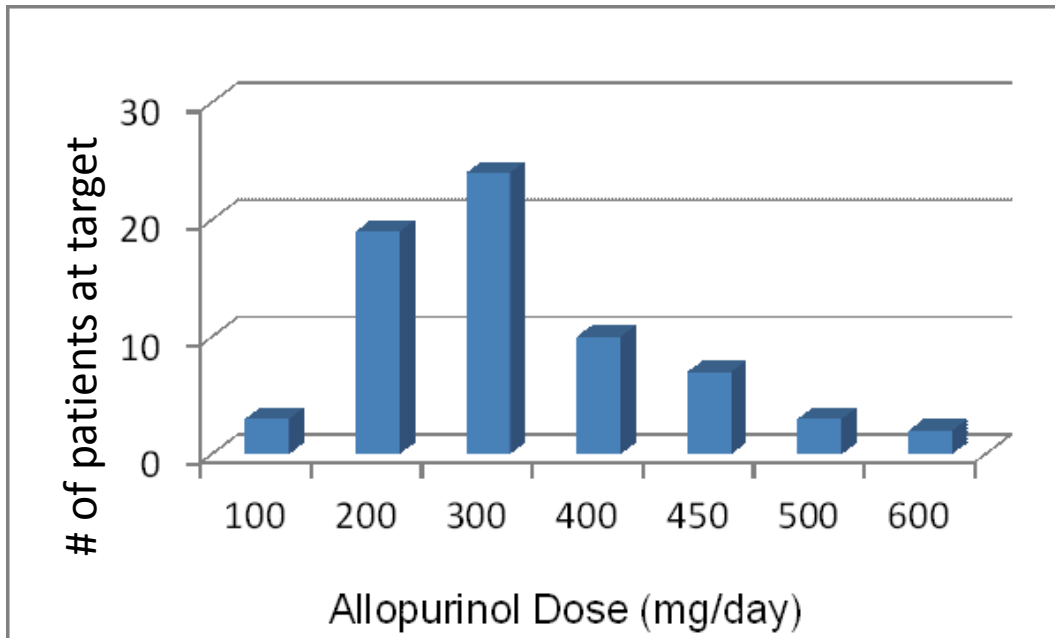

1  
2  
3  
4  
5  
6  
7  
8 **Effectiveness of a pharmacist-based gout care management program in a large**  
9 **integrated health plan: Results from a pilot study**  
10  
11

12  
13  
14  
15  
16 Robert D Goldfien<sup>1</sup>, Michele S Ng<sup>2</sup>, Goldie Yip<sup>2</sup>, Alice Hwe<sup>2</sup>, Alice Jacobson<sup>3</sup>, Alice  
17 Pressman<sup>3</sup>, Andrew L Avins<sup>3</sup>  
18  
19

20  
21  
22  
23  
24 <sup>1</sup>Department of Rheumatology, Kaiser Permanente, Richmond, CA USA, <sup>2</sup>Department of  
25 Clinical Pharmacy, and the <sup>3</sup>Division of Research, Kaiser Permanente Oakland, CA  
26  
27

28  
29  
30  
31 Correspondence to:  
32

33  
34  
35 Robert Goldfien, MD  
36

37 Department of Rheumatology  
38

39 Kaiser Permanente Northern California  
40

41 901 Nevin Ave  
42

43 Richmond, CA 94941 USA  
44

45 This work was funded through a Kaiser Permanente Community Benefits Research Grant  
46

47 None of the authors has any potential conflict of interest regarding this work  
48

49 There is no additional data available  
50  
51  
52  
53  
54  
55  
56  
57  
58  
59  
60

## Abstract

### Background:

The incidence of gout has been steadily rising. While effective treatments are available, treatment is often unsuccessful because current approaches to management lack a systematic approach. To address this shortcoming we tested a protocol-based, pharmacist-staffed intervention to manage patients with recurrent gout.

### Methods:

Patients in Kaiser Permanente, Northern California (KPNC) with recurrent gout were referred by their primary care physicians to a pharmacist-staffed gout management clinic supervised by a board-certified rheumatologist. The pharmacist used a protocol that employs standard gout medications to achieve and maintain a serum uric acid (sUA) level of 6.0 mg/dl or less. Results from the first 100 consecutive patients enrolled in this pilot program are reported here.

### Results:

In 95 evaluable patients enrolled in our pilot program, a sUA of 6.0 mg/dl or less was achieved and maintained in 78 patients with 4 still in the program to date. Five patients declined to participate after referral, and another 13 patients did not complete the program. [\(The majority of these were due to non-adherence.\)](#)

### Conclusions:

A structured pharmacist-staffed program can effectively and safely lower and maintain uric acid levels in a high percentage of patients with recurrent gout. This care model is simple to implement, efficient and warrants further validation in a clinical trial.

## Introduction

Gout is the most common inflammatory arthritis in men (1) and results in considerable morbidity and utilization of health care resources. (2) The past 30 years have witnessed a steady increase in the prevalence of gout. (3–5) The causes of this rise in gout prevalence appear to be linked to the increasing prevalence of obesity, diabetes, chronic renal disease and hypertension. (6,7) Unlike other common rheumatic diseases, the underlying cause of gout, chronic elevation of serum uric acid (sUA), is well understood.

Current approaches for management of other common chronic conditions, such as diabetes, are based on the principle that chronic illnesses are best managed by identifying predictors of optimal outcomes, setting treatment targets, and then monitoring for success in treating to the targets. (8) In the case of gout, an appropriate treatment target has been identified by expert panels sponsored by the European League Against Rheumatism (EULAR) (9) and the American College of Rheumatology (ACR). (10) Both recommend that patients with tophaceous or recurrent gout be treated with urate-lowering therapy (ULT) to a target sUA of < 6.0 mg/dl. Unfortunately, only a minority of gout patients receives appropriate treatment, including doses of ULT sufficient to achieve this target.

(11) There are several reasons for this deficiency which have been addressed by other authors. (12,13). The reasons cited have included lack of appropriate monitoring, failure to treat to target and fear of escalation of ULT in some patients, particularly patients with chronic kidney disease. Taken together, it appears that there is a great need for improved approaches to the management of gout.

1  
2  
3  
4  
5  
6  
7  
8  
9  
10 To address the problem of inadequate management of gout, we developed a model for  
11 gout management consisting of a 'virtual' clinic comprised of a clinical pharmacist under  
12 the supervision of a board-certified rheumatologist. Following a written protocol, the  
13 pharmacist initiates, adjusts and monitors the use of standard gout medications for  
14 patients referred by their primary care physicians for recurrent or tophaceous gout.  
15 Patients are followed by the clinic until they have 2 consecutive target sUA results at  
16 least 3 months apart, and are then discharged back to their usual care. We report here the  
17 outcomes results of a pilot program by presenting the outcomes of the first 100 patients  
18 referred to the program. Though a limited intervention, our intent was to address some of  
19 the issues identified in the literature and do it in a way that is highly leveraged and  
20 potentially suitable for a large majority of patients with chronic gout who are currently  
21 not being adequately managed.

## 32 33 34 35 **Methods**

### 36 37 38 *Patient referral*

39 Patients with gout whose primary care physicians practice at KPNC in Richmond, CA  
40 were eligible for referral to the gout management program. Referral was at the discretion  
41 of the primary care physician (sometimes in consultation with a rheumatologist), based  
42 on a history of recurrent or tophaceous gout and the intent to use urate-lowering therapy  
43 (ULT). Referring physicians were offered the choice of referring each patient for a  
44 formal rheumatology consultation, or to the gout management program, supervised by the

1  
2  
3  
4  
5  
6  
7  
8  
9 same rheumatologist (RG). The clinical pharmacist then telephoned the referred patients,  
10 introduced them to the protocol and, if they agreed to participate, entered them into the  
11 program. Patients consenting to treatment in the program were provided written  
12 educational material including dietary guidelines at the time of program entry. Patients  
13  
14 with end stage renal disease were excluded from the program. The pharmacist, under a  
15  
16 protocol approved by the Kaiser Permanente East Bay Pharmacy and Therapeutics  
17  
18 Committee, was authorized to order relevant laboratory tests and initiate or change orders  
19  
20 for the medications used to manage sUA, and for flare prophylaxis. For treatment of  
21  
22 acute flares, medication orders were sometimes provided by the rheumatologist if outside  
23  
24 the scope of the pharmacy protocol.  
25  
26  
27  
28

#### 29 *Laboratory assessment and monitoring*

30  
31 Baseline laboratory assessment performed on all referred patients consisted of a sUA,  
32  
33 alanine aminotransferase (ALT), estimated glomerular filtration rate (eGFR) and  
34  
35 complete blood count (CBC). This same panel of laboratory tests was repeated as needed  
36  
37 to monitor progress while the patient was enrolled in the gout management clinic.  
38  
39

#### 40 *Treatment protocol*

41  
42 Figure 1 is a schematic diagram of the assessment and treatment protocol. Once entered  
43  
44 into the program, baseline laboratory assessment was performed if not available within  
45  
46 the prior month. If, at the time of referral, a patient was being treated for an acute flare of  
47  
48 gout, this treatment was continued and completed. Once a baseline laboratory assessment  
49  
50 was available, ULT was either initiated or adjusted if the sUA was above 6.0 mg/dl. Flare  
51  
52  
53  
54  
55  
56  
57  
58  
59  
60

1  
2  
3  
4  
5  
6  
7  
8 prophylaxis was used in all cases (see below). After any change in ULT, the patient was  
9  
10 instructed to return for laboratory assessment (sUA, ALT, CBC, eGFR) in 2 weeks, and  
11  
12 report any adverse drug reactions (ADRs) or gout symptoms. ADRs or gout flares were  
13  
14 managed by the clinical pharmacist, usually in consultation with the supervising  
15  
16 rheumatologist. This process was continued in an iterative fashion until a target sUA of  $\leq$   
17  
18 6.0 mg/dl was achieved. Patients at target were asked to repeat the laboratory assessment  
19  
20 in 3 months. At that time, patients still at target were discharged from the clinic and  
21  
22 instructed to continue their medications and follow up with their primary care physician.  
23  
24 Those not at target were either restarted on their ULT or it was titrated and the level re-  
25  
26 tested in 2 weeks. Patients remained in the gout management program until they  
27  
28 demonstrated 2 sUAs  $\leq$  6 mg/dl at least 3 months apart.  
29  
30

### 31 *Pharmacological treatments*

32  
33 ULT was initiated with allopurinol in all patients as first-line therapy unless the patient  
34  
35 had a known ADR or allergy to allopurinol. The starting dose for allopurinol-naïve  
36  
37 patients was 100 mg daily (some patients were on higher doses at the time of referral).  
38  
39 Dose titration for patients not at target sUA was done using 100 mg per day increments,  
40  
41 or in some cases, although selected patients on 300 mg daily were titrated to 450 mg  
42  
43 daily. The maximum allopurinol dose used in the program was 600 mg per day. Patients  
44  
45 already on febuxostat or probenecid were maintained on these and doses titrated as  
46  
47 needed based on sUA. Patients who developed a significant ADR or symptoms of  
48  
49 allergy to allopurinol were switched to either febuxostat 40 mg daily or probenecid 500  
50  
51  
52  
53  
54  
55  
56  
57  
58  
59  
60

1  
2  
3  
4  
5  
6  
7  
8 mg daily, depending on their clinical status in consultation with the rheumatologist. Dose  
9 titration was then continued with these drugs if needed.  
10

11  
12  
13  
14 Gout-flare prophylaxis was used in all patients and in most instances we utilized  
15 colchicine 0.6 mg daily. For patients with eGFR less than 30, the dose was reduced to 0.3  
16 mg per day. In some patients, if recommended by the rheumatologist, a daily  
17 nonsteroidal anti-inflammatory drug (NSAID) treatment was substituted, if no  
18 contraindication prevented this.  
19  
20  
21  
22  
23

24  
25  
26 Acute gout flares were managed by the clinical pharmacist, in consultation with the  
27 rheumatologist, using oral NSAIDs, prednisone or colchicine.  
28  
29

30  
31 Adverse drug reactions (ADR) to medications, incident gout flares and abnormal  
32 laboratory parameters were recorded by the clinical pharmacist at each telephone  
33 encounter and reviewed by the rheumatologist for management.  
34  
35  
36  
37

## 38 39 **Results**

40  
41  
42  
43 Patient demographics and co morbidities of the pilot sample are described in Table 1.  
44  
45

46  
47 Table 1. Demographic and clinical characteristics of patients (N=100)

48  
49

| Characteristic | Mean (range) |
|----------------|--------------|
| Age, years     | 61 (32-94)   |

50  
51  
52  
53  
54  
55  
56  
57  
58  
59  
60



|                                  |            |
|----------------------------------|------------|
| BMI, kg/m <sup>2</sup>           | 31 (20-48) |
|                                  | Percent    |
| Male                             | 75%        |
| Hypertension                     | 75%        |
| Chronic kidney disease (CKD 2-4) | 29%        |
| Diabetes                         | 29%        |
| Coronary artery disease          | 10%        |
| Congestive heart failure         | 11%        |
| 2 or more co-morbidities         | 46%        |

Three-fourths of the patients were male. The mean age was 61 years, (range: 32 – 94 years). The mean body mass index was 31 kg/m<sup>2</sup> (range: 20 – 48 kg/m<sup>2</sup>). Common gout-associated co-morbidities were determined based on the presence of specific ICD-9 codes listed in the problem list of each patient in the electronic medical record, and verified by chart review. The majority of patients had at least one of the common co-morbidities associated with gout. Seventy-eight percent had hypertension, and 29% had chronic kidney disease (CKD). Of these, 2 had stage 2 CKD, 22 had stage 3 CKD and 3 had stage 4 CKD-stage 3 or 4. Another and 29% had diabetes. A smaller number had either coronary artery disease or congestive heart failure. Forty-five percent of the patients had 2 or more of these co-morbid conditions.

Figure 2 is a schematic that shows the current status of the first 100 patients referred to our clinic. Five patients declined to participate when initially contacted by the pharmacist. Thus, 95 patients started the program, and at the time of this analysis, 78 had completed the program with 2 consecutive sUA measurements of < 6.0 mg/dl, and 4 were

1  
2  
3  
4  
5  
6  
7  
8 still being managed. Thirteen patients left the program prior to achieving the end point.  
9  
10 Of these, 2 patients died while in the program. One died from complications of  
11 abdominal surgery and the other, aged 94, died at home of “natural causes”. One patient  
12 developed symptoms of an allergic reaction to allopurinol and declined further treatment.  
13  
14 One patient lost insurance coverage, and another was incarcerated. The remaining 8  
15 patients were discharged by the program pharmacist because of a pattern of non-  
16 adherence to treatment or lab monitoring, or because they elected not to complete the  
17 program. The time patients spent under program management varied considerably. The  
18 mean duration of participation was 47.8 weeks (range 14.9-109.6 weeks). Although our  
19 program was a feasibility study and designed as a short term intervention, when we  
20 examined the medical records of the 78 patients who have successfully completed the  
21 program, we found that 63 of these had been tested at least one time by their regular  
22 physician after clinic discharge (mean follow up time 36 weeks) and that 53 of these  
23 (80%) still maintained a sUA of 6.0 or less.  
24  
25  
26  
27  
28  
29  
30  
31  
32  
33  
34  
35

36  
37 Figure 3 shows the sUA's of each patient in the pilot gout-management study as a set of  
38 paired samples. Each pair of bars represents the baseline sUA (red bars) and final sUA  
39 (blue bars) for each patient. For those patients still in the program (i.e., those who have  
40 not yet achieved the discharge criterion of 2 consecutive sUA measurements of  $\leq 6.0$   
41 mg/dl), the blue bar is the most recent sUA available if the patient did not complete the  
42 program. The dotted horizontal line represents the sUA target of 6.0 mg/dl. The figure  
43 shows all the patients who entered the program, including those who are still being  
44 managed and those who did not complete the program.  
45  
46  
47  
48  
49  
50  
51  
52  
53  
54  
55  
56  
57  
58  
59  
60

1  
2  
3  
4  
5  
6  
7  
8  
9  
10 To provide a more detailed view of how patients responded to management by the clinic,  
11 we plotted sequential sUA levels in a subset of our patients. Figure 4 shows this analysis  
12 in 20 randomly selected patients entering the program. Each line represents the  
13 sequential sUA measurements of a single patient for a period of 12 months. Essentially  
14 all the patients in this random sample initially responded with significant reduction in  
15 sUA. In many patients, this improvement was sustained, but in others, the sUA  
16 subsequently rose due to discontinuation of ULT. In these patients, the pharmacist was  
17 able, in most cases, to restart ULT and continue testing to assure continuing medication  
18 adherence. The Figure also shows that by 12 months in the program, 16 of the 20  
19 patients had achieved a target sUA and two had a normal sUA of < 6.8 mg/dl.  
20  
21  
22  
23  
24  
25  
26  
27  
28  
29  
30

31 Analysis of the 78 patients who have completed the program after achieving and  
32 maintaining the targeted sUA showed that 68 (87%, 95% CI: 78% to 94%) were on  
33 allopurinol at discharge. Figure 5 shows the distribution of allopurinol doses required to  
34 achieve a sUA of  $\leq 6.0$ . The mean daily allopurinol dose required to achieve a sUA of  $\leq$   
35 6 was 311 mg. Sixty-eight percent of patients on allopurinol achieved target on 300 mg  
36 per day or less. Only three patients achieved goal on the starting dose of 100 mg daily  
37 and two patients required 600 mg per day. All five patients on febuxostat had achieved  
38 the goal sUA level on 40 mg per day.  
39  
40  
41  
42  
43  
44  
45  
46  
47  
48

49 Three patients (3%) experienced rash or other symptoms of allergy to allopurinol. None  
50 required more than discontinuation of the medication. Of these, two patients were  
51  
52  
53  
54  
55  
56  
57  
58  
59  
60

1  
2  
3  
4  
5  
6  
7  
8 changed to alternative ULT and one patient declined further treatment and discontinued  
9 the program. Elevation of ALT was seen at some time during treatment in 47 patients  
10 (48%), but only 7 of the patients had elevations high enough to require changing  
11 medication. Most stabilized or returned to normal with continued treatment and  
12 monitoring. Incident acute gout flares were reported in 33 patients (34%). None resulted  
13 in discontinuation of ULT. Gastrointestinal side effects were uncommon and in no case  
14 required a change in therapy.  
15  
16  
17  
18  
19  
20  
21  
22  
23

## 24 Discussion

25  
26  
27 Gout is arguably the best understood of the common inflammatory arthritic diseases;  
28 effective preventive therapy is readily available and the key outcome (sUA < 6 mg/dl in  
29 most cases) is easily measured. Why, then, is unsuccessful control of sUA so frequent? A  
30 number of factors contribute to suboptimal gout management. (11,12,14) Adherence to  
31 ULT is poor when compared to medication adherence in other chronic conditions. (15)  
32 Symptoms are typically intermittent with extended gout-free periods. Moreover, there are  
33 effective treatments for gout flares, and medications (for example, colchicine) that can  
34 reduce the incidence of flares without lowering sUA. It is not surprising therefore, that  
35 many gout patients are never started on, or discontinue ULT. Another important feature  
36 of gout management is that initiation of ULT can lead to a short-term increase in  
37 incidence of gout flares, (16) further discouraging the continuation of therapy. Better  
38 patient education could be expected to improve long-term medication adherence, but is  
39 not consistently provided. (17) While diet is clearly a factor in the development of gout  
40  
41  
42  
43  
44  
45  
46  
47  
48  
49  
50  
51  
52  
53  
54  
55  
56  
57  
58  
59  
60

1  
2  
3  
4  
5  
6  
7  
8 (18), patients and physicians frequently place a disproportionate emphasis on dietary  
9 restrictions. (19) Although consensus guidelines recommend treating with ULT to a  
10 target sUA of 6.0 mg/dl or less, concerns about allopurinol toxicity may discourage some  
11 physicians from achieving this goal. In particular, limiting doses of allopurinol in patients  
12 with CKD lead to a high percentage of treatment failures (20). Finally, many clinical  
13 laboratories do not correctly identify serum urate concentrations of > 6.8 mg/dl as being  
14 abnormal. This leads to under-treatment and considerable confusion about diagnosis and  
15 management. (21)  
16  
17  
18  
19  
20  
21  
22  
23

24  
25  
26 Our pilot program was conceived as a way to re-frame the approach to gout management.  
27 We hypothesized that using a structured treat-to-target approach with regular monitoring  
28 and a goal-directed intervention would result in a high percentage of patients achieving a  
29 target sUA. In particular, the protocol was designed to use a slow titration of ULT along  
30 with flare prophylaxis and scheduled follow up calls. We also required sustained control  
31 of sUA for at least 3 months as a way to promote longer term medication adherence. We  
32 realize that maintaining treatment for 3 months does not guarantee long term control of  
33 sUA. Nevertheless, of the patients for whom a follow up test was available, 80% were  
34 still at target a mean of 36.8 weeks after clinic discharge. As for any chronic condition,  
35 optimal outcomes will require some level of structured monitoring.  
36  
37  
38  
39  
40  
41  
42  
43  
44  
45

46  
47 The results of our pilot program suggest that a structured program may be an effective  
48 approach to gout management. ULT medications are highly effective, and therefore  
49 almost all our patients responded with significant reductions in sUA within weeks of  
50  
51  
52  
53  
54  
55  
56  
57  
58  
59  
60

1  
2  
3  
4  
5  
6  
7  
8 starting the program (Figure 4). Dose titration allowed most patients to achieve a target  
9 sUA of  $\leq 6.0$  mg/dl and to-date, all patients have been able to achieve goal using standard  
10 doses of available medications. The demographic and clinical features of the patients in  
11 our gout sample were similar to those seen in the general population of gout patients  
12 described in previous studies, (22,23) suggesting that our findings should be  
13 generalizable to gout populations outside KPNC. A nurse-staffed case management  
14 approach has been used and achieved impressive results in controlling sUA in gout  
15 patients (234). Our pilot program is also based on a structured management approach, but  
16 did not require any clinic visits. This model is highly efficient and therefore suitable for  
17 managing a large population of gout patients, but not necessarily more effective than a  
18 case management approach.-  
19  
20  
21  
22  
23  
24  
25  
26  
27  
28  
29

30  
31 There is ample evidence that therapeutic inertia contributes to inadequate results of ULT  
32 (24). Our program was designed specifically to counter this problem by including  
33 repeated sUA measurements and specified actions based on the results. In addition, our  
34 protocol We used a treat to target approach and did not limit doses of allopurinol  
35 specifically based on renal function, which has been one of several impediments noted in  
36 the literature to successful ULT. Current recommendations do not support the need to  
37 limit allopurinol doses to 100 mg daily in patients with CKD, (25–27) though a low  
38 starting dose and slow titration is recommended. (26,28) Indeed, limiting the dose of  
39 allopurinol based on the presence of chronic kidney disease has been shown to result in  
40 treatment failure in an unacceptably high percentage of patients. (17) Our data confirm  
41 this observation: only three of 68 allopurinol-treated patients (4%) completing the  
42  
43  
44  
45  
46  
47  
48  
49  
50  
51  
52  
53  
54  
55  
56  
57  
58  
59  
60

1  
2  
3  
4  
5  
6  
7  
8 program achieved a sUA of  $\leq 6.0$  on 100 mg daily of allopurinol, and only 68% achieved  
9 target with 300 mg daily (Figure 5).  
10  
11

12  
13  
14 Not surprisingly, we encountered many cases of medication non-adherence. In most  
15 cases, this was detected in the course of the routine testing that comprised the protocol.  
16 Typically a patient whose sUA was at or near target, had a repeat test that was no longer  
17 at target. In some cases, non-adherence was discovered at the time the patient called to  
18 pharmacist because of a gout flare. Our protocol, by requiring two consecutive target  
19 sUA levels three months apart, was designed with the expectation that adherence to ULT  
20 would be inconsistent. ~~We do~~ As noted previously, we do not know whether our time-  
21 limited intervention will ultimately lead to long-term control of sUA in these patients, but  
22 we were able to detect medication non-adherence in the first few months and thus  
23 reinforce the importance of long-term ULT. Ideally, monitoring of sUA would continue  
24 on a regular basis, as recommended for relevant laboratory parameters in other chronic  
25 conditions. Despite the fact that all patients were prescribed colchicine or NSAIDs for  
26 flare prophylaxis, we encountered a substantial number of gout flares during the program.  
27 While some increase in flares may be expected, in our experience, many of the flares in  
28 our patients occurred in connection with medication non-adherence. This tendency of  
29 gout patients to discontinue ULT accounted for the wide range of times patients had to  
30 stay under management. We provided our patients with written educational material as  
31 well, but could not evaluate the effectiveness of this.  
32  
33  
34  
35  
36  
37  
38  
39  
40  
41  
42  
43  
44  
45  
46  
47  
48  
49

50 We designed our pilot to be efficient and cost-effective by leveraging physician time.  
51  
52  
53  
54  
55  
56  
57  
58  
59  
60

1  
2  
3  
4  
5  
6  
7  
8 The gout management program, while supervised by a rheumatologist, was staffed by a  
9 clinical pharmacist who was carefully trained in the management protocol. The  
10 pharmacist was able to manage a cohort of up to about 80 patients at a time while  
11 spending only about 6-8 hours per week. The time spent in overseeing and assisting the  
12 clinical pharmacist was never more than about 30 minutes per week for the  
13 rheumatologist once the program was in place. Moreover, our program did not require  
14 any in-person visits. This model suggests a path to improved outcomes in gout patients  
15 without generating the magnitude of increased utilization of health care resources that  
16 might otherwise be required. We recognize that pharmacists may not be available or  
17 allowed to manage patients as was done in our protocol. Even so, a trained clinical nurse  
18 could be substituted in the pharmacist's role and provide excellent care while leveraging  
19 physician time.  
20  
21  
22  
23  
24  
25  
26  
27  
28  
29  
30  
31  
32  
33  
34  
35  
36  
37  
38  
39  
40  
41  
42  
43  
44  
45  
46  
47  
48  
49  
50  
51  
52  
53  
54  
55  
56  
57  
58  
59  
60



## References

1. Lawrence RC, Felson DT, Helmick CG, Arnold LM, Choi H, Deyo RA, et al. Estimates of the prevalence of arthritis and other rheumatic conditions in the United States: Part II. *Arthritis & Rheumatism*. 2008 Jan;58(1):26–35.
2. Krishnan E, Lienesch D, Kwok CK. Gout in ambulatory care settings in the United States. *The Journal of Rheumatology*. 2008 Mar 1;35(3):498–501.
3. Wallace, KL, Riedel, AA, Joseph Ridge, N, Wortman, R. Increasing prevalence of gout and hyperuricemia over 10 years among older adults in a managed care population. *The Journal of Rheumatology*. 31(8):1582–6.
4. Arromdee E, Michet CJ, Crowson CS, O'Fallon WM, Gabriel SE. Epidemiology of gout: is the incidence rising? *J. Rheumatol*. 2002 Nov;29(11):2403–6.
5. Kramer, HN, Curhan, G. The association between gout and nephrolithiasis: The National Health and Nutrition Examination Survey III. *American Journal of Kidney Diseases*. 40:37–42.
6. Weaver, AL. Epidemiology of gout. *Cleveland Clinic Journal of Medicine*. 2008 Jul;75(Supplement 5):9–12.
7. Annemans, L, Spaepen, E, Gaskin, M et al. Gout in the UK and Germany: prevalence, comorbidities and management in general practice 2000–2005. *Annals of the Rheumatic Diseases*. 2008;67:960–6.
8. Peters AL, Davidson MB. Application of a diabetes managed care program. The feasibility of using nurses and a computer system to provide effective care. *Diabetes Care*. 1998 Jul;21(7):1037–43.
9. Zhang W. EULAR evidence based recommendations for gout. Part II: Management. Report of a task force of the EULAR Standing Committee For International Clinical Studies Including Therapeutics (ESCSIT). *Annals of the Rheumatic Diseases*. 2006 Mar 28;65(10):1312–24.
10. Khanna D, Fitzgerald JD, Khanna PP, Bae S, Singh MK, Neogi T, et al. 2012 American College of Rheumatology guidelines for management of gout. Part 1: Systematic nonpharmacologic and pharmacologic therapeutic approaches to hyperuricemia. *Arthritis Care & Research*. 2012 Oct;64(10):1431–46.
11. Edwards NL. Quality of Care in Patients with Gout: Why is Management Suboptimal and What Can Be Done About It? *Current Rheumatology Reports*. 2010 Dec 14;13(2):154–9.
12. Pascual, E, Sivera, F. Why is gout so poorly managed? *Annals of the Rheumatic Diseases*. 2007;66:1269–70.

Field Code Changed

13. Singh, JA, Hodges, JS, Toseano, JP, Asch, SM. Quality of care for gout in the US needs improvement. *Arthritis Care & Research*. 2007;57(5):822–9.
14. Becker, MA, Chohan, S. We can make gout management more successful now. *Current Opinion in Rheumatology*. 2008;20:167–72.
15. Briesacher BA, Andrade SE, Fouayzi H, Chan KA. Comparison of Drug Adherence Rates Among Patients with Seven Different Medical Conditions. *Pharmacotherapy*. 2008 Apr;28(4):437–43.
16. Schumacher HR, Becker MA, Lloyd E, MacDonald PA, Lademacher C. Febuxostat in the treatment of gout: 5-yr findings of the FOCUS efficacy and safety study. *Rheumatology*. 2008 Nov 2;48(2):188–94.
17. Harrold LR, Mazor KM, Peterson D, Naz N, Firmino C, Yood RA. Patients' knowledge and beliefs concerning gout and its treatment: a population-based study. *BMC Musculoskeletal Disorders*. 2012;13(1):180.
18. Choi HK, Atkinson K, Karlson EW, Willett W, Curhan G. Purine rich foods, dairy and protein intake, and the risk of gout in men. *N. Engl. J. Med*. 2004 Mar 11;350(11):1093–103.
19. Doherty M, Jansen TL, Nuki G, Pascual E, Perez Ruiz F, Punzi L, et al. Gout: why is this curable disease so seldom cured? *Annals of the Rheumatic Diseases*. 2012 Aug 3;71(11):1765–70.
20. Dalbeth N, Kumar S, Stamp L, Gow P. Dose adjustment of allopurinol according to creatinine clearance does not provide adequate control of hyperuricemia in patients with gout. *J. Rheumatol*. 2006 Aug;33(8):1646–50.
21. Mandell BF. Confessions of a goutophile: Despite its treatability, gout remains a problem. *Cleve Clin J Med*. 2008 Jul;75 Suppl 5:S1.
22. Kim KY, Ralph Schumacher H, Hunsche E, Wertheimer AI, Kong SX. A literature review of the epidemiology and treatment of acute gout. *Clin Ther*. 2003 Jun;25(6):1593–617.
23. Trifiro G, Morabito P, Cavagna L, Ferrajolo C, Pecchioli S, Simonetti M, et al. Epidemiology of gout and hyperuricaemia in Italy during the years 2005–2009: a nationwide population-based study. *Annals of the Rheumatic Diseases*. 2012 Jun 26;72(5):694–700.
24. Rees F, Jenkins W, Doherty M. Patients with gout adhere to curative treatment if informed appropriately: proof of concept observational study. *Annals of the Rheumatic Diseases* [Internet]. 2012 Jun 7 [cited 2013 Apr 12]; Available from: <http://ard.bmj.com/cgi/doi/10.1136/annrheumdis-2012-201676>

- 1  
2  
3  
4  
5  
6  
7  
8  
9  
10  
11  
12  
13  
14  
15  
16  
17  
18  
19  
20  
21  
22  
23  
24  
25  
26  
27  
28  
29  
30  
31  
32  
33  
34  
35  
36  
37  
38  
39  
40  
41  
42  
43  
44  
45  
46  
47  
48  
49  
50  
51  
52  
53  
54  
55  
56  
57  
58  
59  
60
- ~~25. Stamp LK, O'Donnell JL, Zhang M, James J, Frampton C, Barelay ML, et al. Using allopurinol above the dose based on creatinine clearance is effective and safe in patients with chronic gout, including those with renal impairment. *Arthritis & Rheumatism*. 2011 Feb;63(2):412–21.~~
- ~~26. Chao J, Terkeltaub R. A critical reappraisal of allopurinol dosing, safety, and efficacy for hyperuricemia in gout. *Current Rheumatology Reports*. 2009 Mar 22;11(2):135–40.~~
- ~~27. Kim SC, Neweomb C, Margolis D, Roy J, Hennessy S. Severe Cutaneous Reactions Requiring Hospitalization in Allopurinol Initiators: A Population-Based Cohort Study. *Arthritis Care & Research*. 2013 Apr;65(4):578–84.~~
- ~~28. Dalbeth N, Stamp L. Allopurinol Dosing in Renal Impairment: Walking the Tightrope Between Adequate Urate Lowering and Adverse Events. *Seminars in Dialysis*. 2007 Apr 17;20(5):391–5.~~
1. Lawrence RC, Felson DT, Helmick CG, Arnold LM, Choi H, Deyo RA, et al. Estimates of the prevalence of arthritis and other rheumatic conditions in the United States: Part II. *Arthritis & Rheumatism*. 2008 Jan;58(1):26–35.
2. Krishnan E, Lienesch D, Kwok CK. Gout in ambulatory care settings in the United States. *The Journal of Rheumatology*. 2008 Mar 1;35(3):498–501.
3. Wallace, KL, Riedel, AA, Joseph-Ridge, N, Wortman, R. Increasing prevalence of gout and hyperuricemia over 10 years among older adults in a managed care population. *The Journal of Rheumatology*. 31(8):1582–6.
4. Arromdee E, Michet CJ, Crowson CS, O'Fallon WM, Gabriel SE. Epidemiology of gout: is the incidence rising? *J. Rheumatol*. 2002 Nov;29(11):2403–6.
5. Kramer, HN, Curhan, G. The association between gout and nephrolithiasis: The National Health and Nutrition Examination Survey III. *American Journal of Kidney Diseases*. 40:37–42.
6. Weaver, AL. Epidemiology of gout. *Cleveland Clinic Journal of Medicine*. 2008 Jul;75(Supplement 5):9–12.
7. Annemans, L, Spaepen, E, Gaskin, M et al. Gout in the UK and Germany: prevalence, comorbidities and management in general practice 2000-2005. *Annals of the Rheumatic Diseases*. 2008;67:960–6.
8. Peters AL, Davidson MB. Application of a diabetes managed care program. The feasibility of using nurses and a computer system to provide effective care. *Diabetes Care*. 1998 Jul;21(7):1037–43.
9. Zhang W. EULAR evidence based recommendations for gout. Part II: Management. Report of a task force of the EULAR Standing Committee For International Clinical

Formatted: Bibliography, Widow/Orphan control, Adjust space between Latin and Asian text, Adjust space between Asian text and numbers

- 1  
2  
3  
4  
5  
6  
7  
8 [Studies Including Therapeutics \(ESCISIT\). Annals of the Rheumatic Diseases. 2006 Mar 28;65\(10\):1312–24.](#)
- 9  
10  
11 [10. Khanna D, Fitzgerald JD, Khanna PP, Bae S, Singh MK, Neogi T, et al. 2012 American College of Rheumatology guidelines for management of gout. Part 1: Systematic nonpharmacologic and pharmacologic therapeutic approaches to hyperuricemia. Arthritis Care & Research. 2012 Oct;64\(10\):1431–46.](#)
- 12  
13  
14  
15  
16 [11. Edwards NL. Quality of Care in Patients with Gout: Why is Management Suboptimal and What Can Be Done About It? Current Rheumatology Reports. 2010 Dec 14;13\(2\):154–9.](#)
- 17  
18  
19  
20 [12. Pascual, E, Sivera, F. Why is gout so poorly managed? Annals of the Rheumatic Diseases. 2007;66:1269–70.](#)
- 21  
22  
23 [13. Singh, JA, Hodges, JS, Toscano, JP, Asch, SM. Quality of care for gout in the US needs improvement. Arthritis Care & Research. 2007;57\(5\):822–9.](#)
- 24  
25  
26 [14. Becker, MA, Chohan, S. We can make gout management more successful now. Current Opinion in Rheumatology. 2008;20:167–72.](#)
- 27  
28  
29 [15. Briesacher BA, Andrade SE, Fouayzi H, Chan KA. Comparison of Drug Adherence Rates Among Patients with Seven Different Medical Conditions. Pharmacotherapy. 2008 Apr;28\(4\):437–43.](#)
- 30  
31  
32 [16. Schumacher HR, Becker MA, Lloyd E, MacDonald PA, Lademacher C. Febuxostat in the treatment of gout: 5-yr findings of the FOCUS efficacy and safety study. Rheumatology. 2008 Nov 2;48\(2\):188–94.](#)
- 33  
34  
35  
36 [17. Choi HK, Atkinson K, Karlson EW, Willett W, Curhan G. Purine-rich foods, dairy and protein intake, and the risk of gout in men. N. Engl. J. Med. 2004 Mar 11;350\(11\):1093–103.](#)
- 37  
38  
39  
40 [18. Doherty M, Jansen TL, Nuki G, Pascual E, Perez-Ruiz F, Punzi L, et al. Gout: why is this curable disease so seldom cured? Annals of the Rheumatic Diseases. 2012 Aug 3;71\(11\):1765–70.](#)
- 41  
42  
43  
44 [19. Dalbeth N, Kumar S, Stamp L, Gow P. Dose adjustment of allopurinol according to creatinine clearance does not provide adequate control of hyperuricemia in patients with gout. J. Rheumatol. 2006 Aug;33\(8\):1646–50.](#)
- 45  
46  
47  
48 [20. Mandell BF. Confessions of a goutophile: Despite its treatability, gout remains a problem. Cleve Clin J Med. 2008 Jul;75 Suppl 5:S1.](#)
- 49  
50  
51  
52 [21. Kim KY, Ralph Schumacher H, Hunsche E, Wertheimer AI, Kong SX. A literature review of the epidemiology and treatment of acute gout. Clin Ther. 2003 Jun;25\(6\):1593–617.](#)
- 53  
54  
55  
56  
57  
58  
59  
60

- 1  
2  
3  
4  
5  
6  
7  
8  
9  
10  
11  
12  
13  
14  
15  
16  
17  
18  
19  
20  
21  
22  
23  
24  
25  
26  
27  
28  
29  
30  
31  
32  
33  
34  
35  
36  
37  
38  
39  
40  
41  
42  
43  
44  
45  
46  
47  
48  
49  
50  
51  
52  
53  
54  
55  
56  
57  
58  
59  
60
22. [Trifiro G, Morabito P, Cavagna L, Ferrajolo C, Pecchioli S, Simonetti M, et al. Epidemiology of gout and hyperuricaemia in Italy during the years 2005-2009: a nationwide population-based study. Annals of the Rheumatic Diseases. 2012 Jun 26;72\(5\):694–700.](#)
  23. [Rees F, Jenkins W, Doherty M. Patients with gout adhere to curative treatment if informed appropriately: proof-of-concept observational study. Annals of the Rheumatic Diseases \[Internet\]. 2012 Jun 7 \[cited 2013 Apr 12\]; Available from: <http://ard.bmj.com/cgi/doi/10.1136/annrheumdis-2012-201676>](#)
  24. [Liote F, Choi H. Managing gout needs more than drugs: “Il faut le savoir-faire, l’Art et la maniere”. Annals of the Rheumatic Diseases. 2013 May 10;72\(6\):791–3.](#)
  25. [Stamp LK, O’Donnell JL, Zhang M, James J, Frampton C, Barclay ML, et al. Using allopurinol above the dose based on creatinine clearance is effective and safe in patients with chronic gout, including those with renal impairment. Arthritis & Rheumatism. 2011 Feb;63\(2\):412–21.](#)
  26. [Chao J, Terkeltaub R. A critical reappraisal of allopurinol dosing, safety, and efficacy for hyperuricemia in gout. Current Rheumatology Reports. 2009 Mar 22;11\(2\):135–40.](#)
  27. [Kim SC, Newcomb C, Margolis D, Roy J, Hennessy S. Severe Cutaneous Reactions Requiring Hospitalization in Allopurinol Initiators: A Population-Based Cohort Study. Arthritis Care & Research. 2013 Apr;65\(4\):578–84.](#)
  28. [Dalbeth N, Stamp L. Allopurinol Dosing in Renal Impairment: Walking the Tightrope Between Adequate Urate Lowering and Adverse Events. Seminars in Dialysis. 2007 Apr 17;20\(5\):391–5.](#)

1  
2  
3  
4  
5  
6  
7  
8  
9  
10  
11  
12  
13  
14  
15  
16  
17  
18  
19  
20  
21  
22  
23  
24  
25  
26  
27  
28  
29  
30  
31  
32  
33  
34  
35  
36  
37  
38  
39  
40  
41  
42  
43  
44  
45  
46  
47  
48  
49  
50  
51  
52  
53  
54  
55  
56  
57  
58  
59  
60

Figures

Fig. 1 Clinic monitoring and treatment flow diagram

### Treatment Protocol

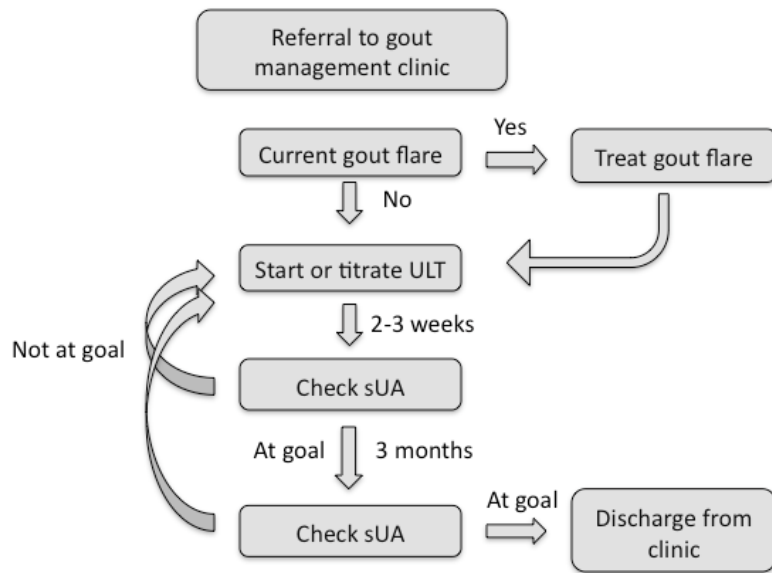

Fig. 2 Current status of first 100 patients referred to program

### Current Patient Status

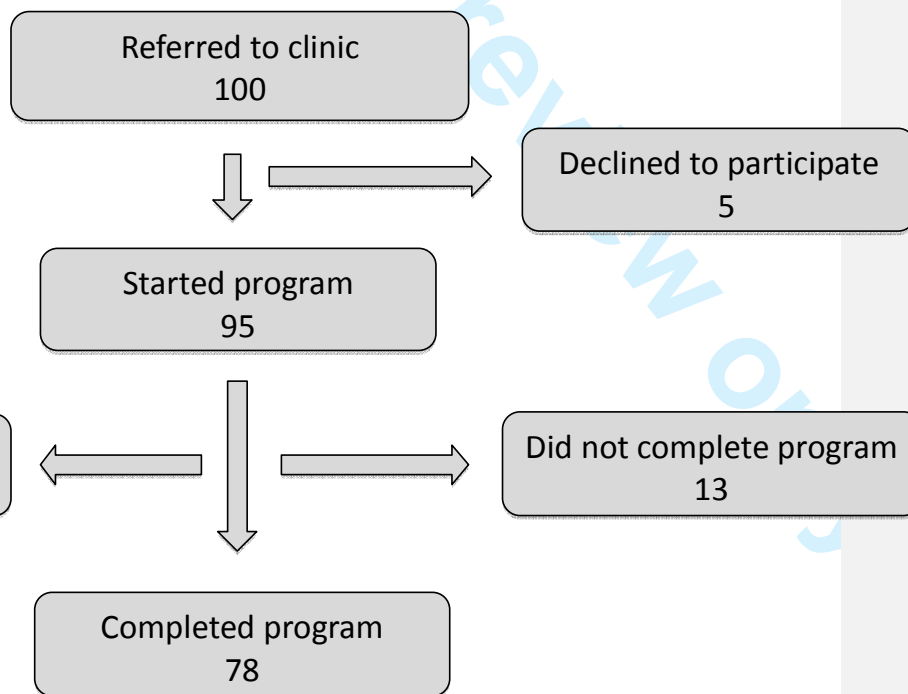

1  
2  
3  
4  
5  
6  
7  
8  
9  
10  
11  
12  
13  
14  
15  
16  
17  
18  
19  
20  
21  
22  
23  
24  
25  
26  
27  
28  
29  
30  
31  
32  
33  
34  
35  
36  
37  
38  
39  
40  
41  
42  
43  
44  
45  
46  
47  
48  
49  
50  
51  
52  
53  
54  
55  
56  
57  
58  
59  
60

Fig. 3 Comparison of pre-treatment sUA and most recent or final sUA. Each patient is represented by a red bar (initial sUA) and a blue bar (final sUA, whether or not he/she completed the program).

### sUA Pairs: First and Last

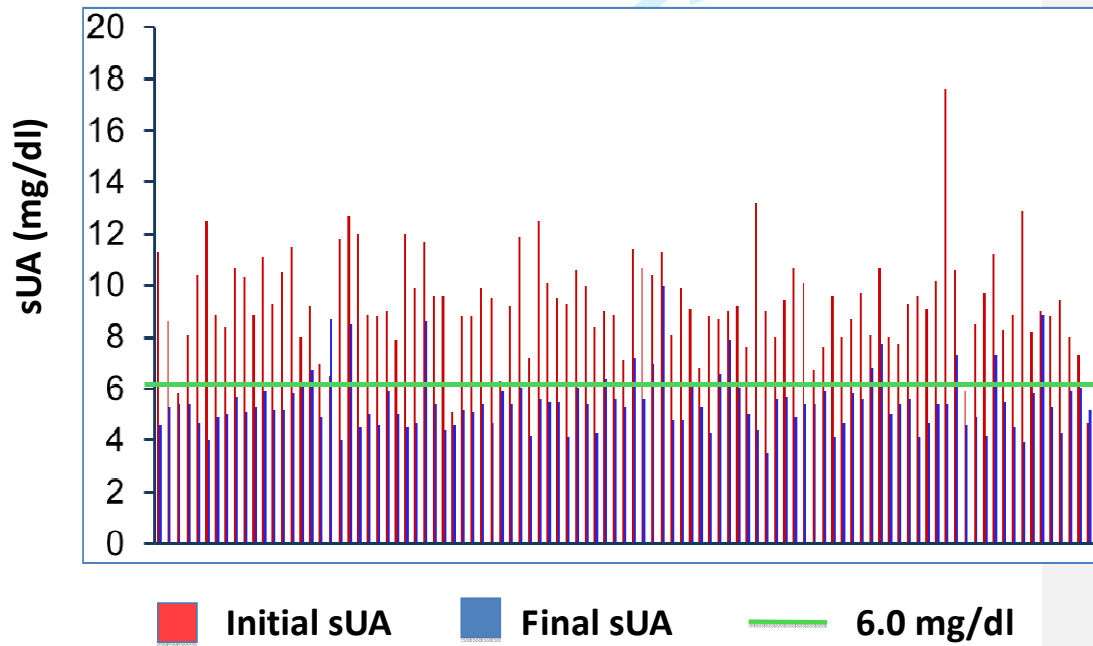



1  
2  
3  
4  
5  
6  
7  
8  
9  
10  
11  
12  
13  
14  
15  
16  
17  
18  
19  
20  
21  
22  
23  
24  
25  
26  
27  
28  
29  
30  
31  
32  
33  
34  
35  
36  
37  
38  
39  
40  
41  
42  
43  
44  
45  
46  
47  
48  
49  
50  
51  
52  
53  
54  
55  
56  
57  
58  
59  
60

Fig. 4 sUA trend lines for 20 randomly selected patients. Each colored line represents sequential sUA levels in a single patient. Each line stops at the time of clinic discharge or is the most recent sUA if the patient had not completed or left the program.

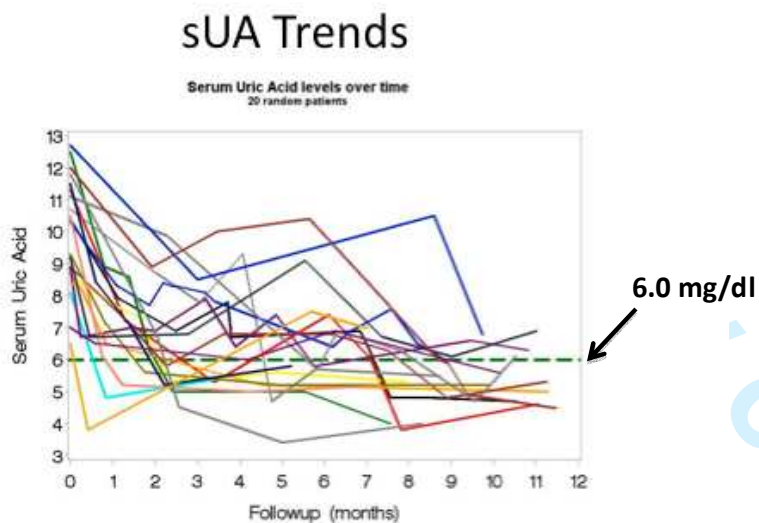

1  
2  
3  
4  
5  
6  
7  
8  
9  
10  
11  
12  
13  
14  
15  
16  
17  
18  
19  
20  
21  
22  
23  
24  
25  
26  
27  
28  
29  
30  
31  
32  
33  
34  
35  
36  
37  
38  
39  
40  
41  
42  
43  
44  
45  
46  
47  
48  
49  
50  
51  
52  
53  
54  
55  
56  
57  
58  
59  
60

Fig. 5 Dose of Allopurinol required to achieve a sUA of  $\leq 6.0$  mg/dl

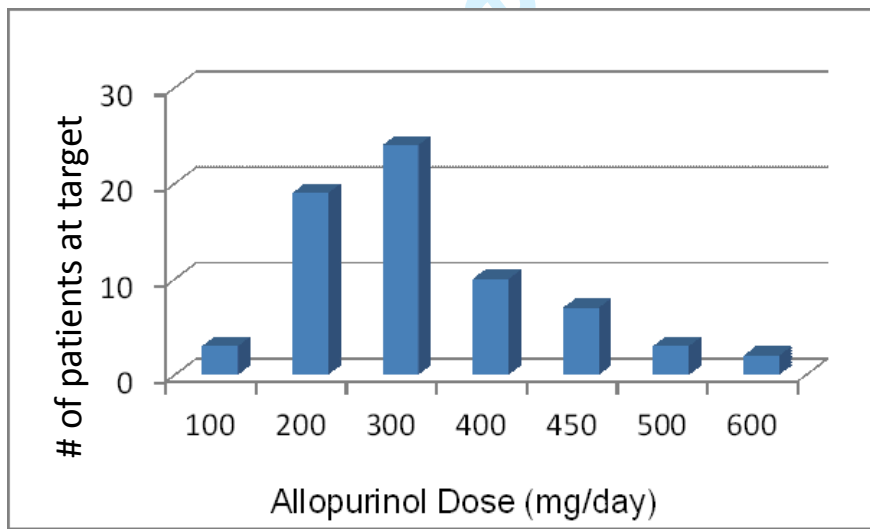

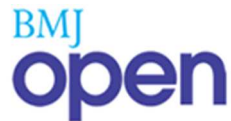

**Effectiveness of a pharmacist-based gout care management program in a large integrated health plan: Results from a pilot study**

|                                 |                                                                                                                                                                                                                                                                                                                                                                                                                                                                               |
|---------------------------------|-------------------------------------------------------------------------------------------------------------------------------------------------------------------------------------------------------------------------------------------------------------------------------------------------------------------------------------------------------------------------------------------------------------------------------------------------------------------------------|
| Journal:                        | <i>BMJ Open</i>                                                                                                                                                                                                                                                                                                                                                                                                                                                               |
| Manuscript ID:                  | bmjopen-2013-003627.R2                                                                                                                                                                                                                                                                                                                                                                                                                                                        |
| Article Type:                   | Research                                                                                                                                                                                                                                                                                                                                                                                                                                                                      |
| Date Submitted by the Author:   | 07-Nov-2013                                                                                                                                                                                                                                                                                                                                                                                                                                                                   |
| Complete List of Authors:       | Goldfien, Robert; Kaiser Permanente Northern California, Department of Rheumatology<br>Ng, Michele; Kaiser Permanente, Department of Clinical Pharmacy<br>Yip, Goldie; Kaiser Permanente, Department of Clinical Pharmacy<br>Hwe, Alice; Kaiser Permanente, Department of Clinical Pharmacy<br>Jacobson, Alice; Kaiser Permanente, Division of Research<br>Pressman, Alice; Kaiser Permanente, Division of Research<br>Avins, Andrew; Kaiser Permanente, Division of Research |
| <b>Primary Subject Heading</b>: | Rheumatology                                                                                                                                                                                                                                                                                                                                                                                                                                                                  |
| Secondary Subject Heading:      | Medical management                                                                                                                                                                                                                                                                                                                                                                                                                                                            |
| Keywords:                       | Rheumatology < INTERNAL MEDICINE, Quality in health care < HEALTH SERVICES ADMINISTRATION & MANAGEMENT, Health economics < HEALTH SERVICES ADMINISTRATION & MANAGEMENT                                                                                                                                                                                                                                                                                                        |
|                                 |                                                                                                                                                                                                                                                                                                                                                                                                                                                                               |

SCHOLARONE™  
Manuscripts

only

1  
2  
3 **Effectiveness of a pharmacist-based gout care management program in a large**  
4  
5 **integrated health plan: Results from a pilot study**  
6  
7  
8  
9  
10

11  
12 Robert D Goldfien<sup>1</sup>, Michele S Ng<sup>2</sup>, Goldie Yip<sup>2</sup>, Alice Hwe<sup>2</sup>, Alice Jacobson<sup>3</sup>, Alice  
13 Pressman<sup>3</sup>, Andrew L Avins<sup>3</sup>  
14  
15  
16  
17  
18  
19  
20  
21

22 <sup>1</sup>Department of Rheumatology, Kaiser Permanente, Richmond, CA USA, <sup>2</sup>Department of  
23 Clinical Pharmacy, and the <sup>3</sup>Division of Research, Kaiser Permanente Oakland, CA  
24  
25  
26  
27  
28

29 Correspondence to:  
30  
31  
32

33  
34 Robert Goldfien, MD  
35  
36 Department of Rheumatology  
37  
38 Kaiser Permanente Northern California  
39  
40 901 Nevin Ave  
41  
42  
43 Richmond, CA 94941 USA  
44  
45  
46  
47  
48  
49  
50  
51  
52  
53  
54  
55  
56  
57  
58  
59  
60

## Abstract

### Objectives:

The study objective was to determine the feasibility of using a pharmacist-staffed, protocol-based structured approach to improving the management of chronic, recurrent gout.

### Setting:

The study was carried out in the outpatient clinic of a single Kaiser Permanente medical center.

This is a community based clinic.

### Participants:

We report on one hundred consecutive patients between the ages of 21 and 94 (75% male) with chronic or recurrent gout, referred by their primary physicians for the purpose of management of urate lowering therapy. Patients with Stage 5 chronic kidney disease or end-stage kidney disease were excluded.

### Interventions:

The program consisted of a trained clinical pharmacist and a rheumatologist. The pharmacist contacted each patient by phone, provided educational and dietary materials, and used a protocol that employs standard gout medications to achieve and maintain a serum uric acid (sUA) level of 6.0 mg/dl or less. Incident gout flares or adverse reactions to medications were managed in consultation with the rheumatologist.

### Primary outcome measure:

The primary outcome measure was the achievement and maintenance of a serum uric acid of 6.0 or less for a period of at least 3 months.

### Results:

In 95 evaluable patients enrolled in our pilot program, a sUA of 6.0 mg/dl or less was achieved and maintained in 78 patients with 4 still in the program to date. Five patients declined to participate after referral, and another 13 patients did not complete the program. (The majority of these were due to non-adherence.)

### Conclusions:

A structured pharmacist-staffed program can effectively and safely lower and maintain uric acid

1  
2  
3 levels in a high percentage of patients with recurrent gout in a primary care setting. This care  
4  
5 model is simple to implement, efficient and warrants further validation in a clinical trial.  
6  
7  
8

## 9 Article Summary

- 10 1. Article focus: Hypotheses addressed
- 11
- 12
  - 13 • A structured, goal-directed program is effective in achieving optimal control of
  - 14 serum uric acid levels in patients with recurrent gout.
  - 15
  - 16 • Successful management of recurrent gout can employ a leveraged approach using
  - 17 a pharmacist-staffed protocol with supervision by a rheumatologist.
  - 18
  - 19 • Chronic gout can be managed efficiently, safely and cost-effectively using a
  - 20 telephone-based 'virtual clinic'.
  - 21
- 22 2. Key messages
- 23
- 24
  - 25 • A protocol based, goal directed gout management program is highly effective
  - 26 in achieving and maintaining serum uric acid control in patients with recurrent
  - 27 gout.
  - 28
  - 29 • Effective urate lowering therapy can be achieved in a high percentage of gout
  - 30 patients using approved doses of allopurinol when dose titration is used.
  - 31
  - 32 • This program appears to be a promising approach to improving gout
  - 33 management and may offer significant efficiency compared to current
  - 34 practice.
  - 35
- 36 3. Strengths and Limitations
- 37
- 38
- 39
- 40
- 41
- 42
- 43

44 Strengths: The population we studied is representative of gout patients seen in general  
45 rheumatology practice, and therefore our results should be widely generalizable. Our  
46 program is relatively easy to implement and requires only a trained clinical pharmacist  
47 and rheumatologist to carry out.  
48

49 Limitations: Although encouraging, this pilot study does not prove that our gout  
50 management program is more effective than usual care for gout because there was no  
51 control group. A study testing this hypothesis is needed. The structure of our  
52 organization, which integrates the health plan, pharmacy programs and physician care, is  
53 optimal for the use of our program. A non-integrated system might lead to barriers in  
54 setting up a similar collaboration. This may limit the applicability of the model.  
55  
56  
57  
58  
59  
60

## Introduction

Gout is the most common inflammatory arthritis in men (1) and results in considerable morbidity and utilization of health care resources. (2) The past 30 years have witnessed a steady increase in the prevalence of gout. (3–5) The causes of this rise in gout prevalence appear to be linked to the increasing prevalence of obesity, diabetes, chronic renal disease and hypertension. (6,7) Unlike other common rheumatic diseases, the underlying cause of gout, chronic elevation of serum uric acid (sUA), is well understood.

Current approaches for management of other common chronic conditions, such as diabetes, are based on the principle that chronic illnesses are best managed by identifying predictors of optimal outcomes, setting treatment targets, and then monitoring for success in treating to the targets. (8) In the case of gout, an appropriate treatment target has been identified by expert panels sponsored by the European League Against Rheumatism (EULAR) (9) and the American College of Rheumatology (ACR). (10) Both recommend that patients with tophaceous or recurrent gout be treated with urate-lowering therapy (ULT) to a target sUA of < 6.0 mg/dl. Unfortunately, only a minority of gout patients receives appropriate treatment, including doses of ULT sufficient to achieve this target. (11) There are several reasons for this deficiency which have been addressed by other authors. (12,13). The reasons cited have included lack of appropriate monitoring, failure to treat to target and fear of escalation of ULT in some patients, particularly patients with chronic kidney disease. Taken together, it appears that there is a great need for improved approaches to the management of gout.

1  
2  
3 To address the problem of inadequate management of gout, we developed a model for  
4  
5 gout management consisting of a 'virtual' clinic comprised of a clinical pharmacist under  
6  
7 the supervision of a board-certified rheumatologist. Following a written protocol, the  
8  
9 pharmacist initiates, adjusts and monitors the use of standard gout medications for  
10  
11 patients referred by their primary care physicians for recurrent or tophaceous gout.  
12  
13 Patients are followed by the clinic until they have 2 consecutive target sUA results at  
14  
15 least 3 months apart, and are then discharged back to their usual care. We report here the  
16  
17 results of a pilot program by presenting the outcomes of the first 100 patients referred to  
18  
19 the program. Though a limited intervention, our intent was to address some of the issues  
20  
21 identified in the literature and do it in a way that is highly leveraged and potentially  
22  
23 suitable for a large majority of patients with chronic gout who are currently not being  
24  
25 adequately managed.  
26  
27  
28  
29  
30  
31  
32  
33

## 34 **Methods**

### 38 *Patient referral*

39  
40 Patients with gout whose primary care physicians practice at KPNC in Richmond, CA  
41  
42 were eligible for referral to the gout management program. Referral was at the discretion  
43  
44 of the primary care physician (sometimes in consultation with a rheumatologist), based  
45  
46 on a history of recurrent or tophaceous gout and the intent to use urate-lowering therapy  
47  
48 (ULT). Referring physicians were offered the choice of referring each patient for a  
49  
50 formal rheumatology consultation, or to the gout management program, supervised by the  
51  
52 same rheumatologist (RG). The clinical pharmacist then telephoned the referred patients,  
53  
54  
55  
56  
57  
58  
59  
60



1  
2  
3 introduced them to the protocol and, if they agreed to participate, entered them into the  
4  
5 program. Patients consenting to treatment in the program were provided written  
6  
7 educational material including dietary guidelines at the time of program entry. Patients  
8  
9 with end stage renal disease were excluded from the program. The pharmacist, under a  
10  
11 protocol approved by the Kaiser Permanente East Bay Pharmacy and Therapeutics  
12  
13 Committee, was authorized to order relevant laboratory tests and initiate or change orders  
14  
15 for the medications used to manage sUA, and for flare prophylaxis. For treatment of  
16  
17 acute flares, medication orders were sometimes provided by the rheumatologist if outside  
18  
19 the scope of the pharmacy protocol.  
20  
21  
22  
23  
24  
25  
26

#### 27 *Laboratory assessment and monitoring*

28  
29 Baseline laboratory assessment performed on all referred patients consisted of a sUA,  
30  
31 alanine aminotransferase (ALT), estimated glomerular filtration rate (eGFR) and  
32  
33 complete blood count (CBC). This same panel of laboratory tests was repeated as needed  
34  
35 to monitor progress while the patient was enrolled in the gout management clinic.  
36  
37  
38  
39  
40

#### 41 *Treatment protocol*

42  
43 Figure 1 is a schematic diagram of the assessment and treatment protocol. Once entered  
44  
45 into the program, baseline laboratory assessment was performed if not available within  
46  
47 the prior month. If, at the time of referral, a patient was being treated for an acute flare of  
48  
49 gout, this treatment was continued and completed. Once a baseline laboratory assessment  
50  
51 was available, ULT was either initiated or adjusted if the sUA was above 6.0 mg/dl. Flare  
52  
53 prophylaxis was used in all cases (see below). After any change in ULT, the patient was  
54  
55  
56  
57  
58  
59  
60

1  
2  
3 instructed to return for laboratory assessment (sUA, ALT, CBC, eGFR) in 2 weeks, and  
4  
5 report any adverse drug reactions (ADRs) or gout symptoms. ADRs or gout flares were  
6  
7 managed by the clinical pharmacist, usually in consultation with the supervising  
8  
9 rheumatologist. This process was continued in an iterative fashion until a target sUA of  $\leq$   
10  
11 6.0 mg/dl was achieved. Patients at target were asked to repeat the laboratory assessment  
12  
13 in 3 months. At that time, patients still at target were discharged from the clinic and  
14  
15 instructed to continue their medications and follow up with their primary care physician.  
16  
17 Those not at target were either restarted on their ULT or it was titrated and the level re-  
18  
19 tested in 2 weeks. Patients remained in the gout management program until they  
20  
21 demonstrated 2 sUAs  $\leq$  6 mg/dl at least 3 months apart.  
22  
23  
24  
25  
26  
27  
28

### 29 *Pharmacological treatments*

30  
31 ULT was initiated with allopurinol in all patients as first-line therapy unless the patient  
32  
33 had a known ADR or allergy to allopurinol. The starting dose for allopurinol-naïve  
34  
35 patients was 100 mg daily (some patients were on higher doses at the time of referral).  
36  
37 Dose titration for patients not at target sUA was done using 100 mg per day increments,  
38  
39 or in some cases, although selected patients on 300 mg daily were titrated to 450 mg  
40  
41 daily. The maximum allopurinol dose used in the program was 600 mg per day. Patients  
42  
43 already on febuxostat or probenecid were maintained on these and doses titrated as  
44  
45 needed based on sUA. Patients who developed a significant ADR or symptoms of  
46  
47 allergy to allopurinol were switched to either febuxostat 40 mg daily or probenecid 500  
48  
49 mg daily, depending on their clinical status in consultation with the rheumatologist. Dose  
50  
51 titration was then continued with these drugs if needed.  
52  
53  
54  
55  
56  
57  
58  
59  
60

1  
2  
3  
4  
5  
6 Gout-flare prophylaxis was used in all patients and in most instances we utilized  
7  
8 colchicine 0.6 mg daily. For patients with eGFR less than 30, the dose was reduced to 0.3  
9  
10 mg per day. In some patients, if recommended by the rheumatologist, a daily  
11  
12 nonsteroidal anti-inflammatory drug (NSAID) treatment was substituted, if no  
13  
14 contraindication prevented this.  
15  
16

17  
18  
19  
20 Acute gout flares were managed by the clinical pharmacist, in consultation with the  
21  
22 rheumatologist, using oral NSAIDs, prednisone or colchicine.  
23  
24

25  
26  
27 Adverse drug reactions (ADR) to medications, incident gout flares and abnormal  
28  
29 laboratory parameters were recorded by the clinical pharmacist at each telephone  
30  
31 encounter and reviewed by the rheumatologist for management.  
32  
33

## 34 35 36 **Results**

37  
38  
39  
40 Patient demographics and co morbidities of the pilot sample are described in Table 1.  
41  
42  
43  
44

45  
46 Table 1. Demographic and clinical characteristics of patients (N=100)  
47

| 48<br>49 Characteristic         | Mean (range) |
|---------------------------------|--------------|
| 50<br>51 Age, years             | 61 (32-94)   |
| 52<br>53 BMI, kg/m <sup>2</sup> | 31 (20-48)   |
| 54<br>55                        | Percent      |
| 56<br>57 Male                   | 75%          |
| 58<br>59<br>60                  |              |

|                                  |     |
|----------------------------------|-----|
| Hypertension                     | 75% |
| Chronic kidney disease (CKD 2-4) | 29% |
| Diabetes                         | 29% |
| Coronary artery disease          | 10% |
| Congestive heart failure         | 11% |
| 2 or more co-morbidities         | 46% |

Three-fourths of the patients were male. The mean age was 61 years, (range: 32 – 94 years). The mean body mass index was 31 kg/m<sup>2</sup> (range: 20 – 48 kg/m<sup>2</sup>). Common gout-associated co-morbidities were determined based on the presence of specific ICD-9 codes listed in the problem list of each patient in the electronic medical record, and verified by chart review. The majority of patients had at least one of the common co-morbidities associated with gout. Seventy-eight percent had hypertension, and 29% had chronic kidney disease (CKD). Of these, 2 had stage 2 CKD, 22 had stage 3 CKD and 3 had stage 4 CKD. Another 29% had diabetes. A smaller number had either coronary artery disease or congestive heart failure. Forty-five percent of the patients had 2 or more of these co-morbid conditions.

Figure 2 is a schematic that shows the current status of the first 100 patients referred to our clinic. Five patients declined to participate when initially contacted by the pharmacist. Thus, 95 patients started the program, and at the time of this analysis, 78 had completed the program with 2 consecutive sUA measurements of < 6.0 mg/dl, and 4 were still being managed. Thirteen patients left the program prior to achieving the end point. Of these, 2 patients died while in the program. One died from complications of abdominal surgery and the other, aged 94, died at home of “natural causes”. One patient

1  
2  
3 developed symptoms of an allergic reaction to allopurinol and declined further treatment.  
4  
5 One patient lost insurance coverage, and another was incarcerated. The remaining 8  
6  
7 patients were discharged by the program pharmacist because of a pattern of non-  
8  
9 adherence to treatment or lab monitoring, or because they elected not to complete the  
10  
11 program. The time patients spent under program management varied considerably. The  
12  
13 mean duration of participation was 47.8 weeks (range 14.9-109.6 weeks). Although our  
14  
15 program was a feasibility study and designed as a short term intervention, when we  
16  
17 examined the medical records of the 78 patients who have successfully completed the  
18  
19 program, we found that 63 of these had been tested at least one time by their regular  
20  
21 physician after clinic discharge (mean follow up time 36 weeks) and that 53 of these  
22  
23 (80%) still maintained a sUA of 6.0 or less.  
24  
25  
26  
27  
28  
29  
30  
31

32 Figure 3 shows the sUA's of each patient in the pilot gout-management study as a set of  
33  
34 paired samples. Each pair of bars represents the baseline sUA (red bars) and final sUA  
35  
36 (blue bars) for each patient. For those patients still in the program (i.e., those who have  
37  
38 not yet achieved the discharge criterion of 2 consecutive sUA measurements of  $\leq 6.0$   
39  
40 mg/dl), the blue bar is the most recent sUA available if the patient did not complete the  
41  
42 program. The dotted horizontal line represents the sUA target of 6.0 mg/dl. The figure  
43  
44 shows all the patients who entered the program, including those who are still being  
45  
46 managed and those who did not complete the program.  
47  
48  
49  
50  
51  
52

53 To provide a more detailed view of how patients responded to management by the clinic,  
54  
55 we plotted sequential sUA levels in a subset of our patients. Figure 4 shows this analysis  
56  
57  
58  
59  
60

1  
2  
3 in 20 randomly selected patients entering the program. Each line represents the  
4  
5 sequential sUA measurements of a single patient for a period of 12 months. Essentially  
6  
7 all the patients in this random sample initially responded with significant reduction in  
8  
9 sUA. In many patients, this improvement was sustained, but in others, the sUA  
10  
11 subsequently rose due to discontinuation of ULT. In these patients, the pharmacist was  
12  
13 able, in most cases, to restart ULT and continue testing to assure continuing medication  
14  
15 adherence. The Figure also shows that by 12 months in the program, 16 of the 20  
16  
17 patients had achieved a target sUA and two had a normal sUA of  $< 6.8$  mg/dl.  
18  
19  
20  
21  
22  
23

24  
25 Analysis of the 78 patients who have completed the program after achieving and  
26  
27 maintaining the targeted sUA showed that 68 (87%, 95% CI: 78% to 94%) were on  
28  
29 allopurinol at discharge. Figure 5 shows the distribution of allopurinol doses required to  
30  
31 achieve a sUA of  $\leq 6.0$ . The mean daily allopurinol dose required to achieve a sUA of  $\leq$   
32  
33 6 was 311 mg. Sixty-eight percent of patients on allopurinol achieved target on 300 mg  
34  
35 per day or less. Only three patients achieved goal on the starting dose of 100 mg daily  
36  
37 and two patients required 600 mg per day. All five patients on febuxostat had achieved  
38  
39 the goal sUA level on 40 mg per day.  
40  
41  
42  
43  
44  
45

46  
47 Three patients (3%) experienced rash or other symptoms of allergy to allopurinol. None  
48  
49 required more than discontinuation of the medication. Of these, two patients were  
50  
51 changed to alternative ULT and one patient declined further treatment and discontinued  
52  
53 the program. Elevation of ALT was seen at some time during treatment in 47 patients  
54  
55 (48%), but only 7 of the patients had elevations high enough to require changing  
56  
57  
58  
59  
60

1  
2  
3 medication. Most stabilized or returned to normal with continued treatment and  
4  
5 monitoring. Incident acute gout flares were reported in 33 patients (34%). None resulted  
6  
7 in discontinuation of ULT. Gastrointestinal side effects were uncommon and in no case  
8  
9 required a change in therapy.  
10  
11

## 12 13 14 15 **Discussion**

16  
17  
18  
19  
20 Gout is arguably the best understood of the common inflammatory arthritic diseases;  
21  
22 effective preventive therapy is readily available and the key outcome (sUA < 6 mg/dl in  
23  
24 most cases) is easily measured. Why, then, is unsuccessful control of sUA so frequent? A  
25  
26 number of factors contribute to suboptimal gout management. (11,12,14) Adherence to  
27  
28 ULT is poor when compared to medication adherence in other chronic conditions. (15)  
29  
30 Symptoms are typically intermittent with extended gout-free periods. Moreover, there are  
31  
32 effective treatments for gout flares, and medications (for example, colchicine) that can  
33  
34 reduce the incidence of flares without lowering sUA. It is not surprising therefore, that  
35  
36 many gout patients are never started on, or discontinue ULT. Another important feature  
37  
38 of gout management is that initiation of ULT can lead to a short-term increase in  
39  
40 incidence of gout flares, (16) further discouraging the continuation of therapy. Better  
41  
42 patient education could be expected to improve long-term medication adherence, but is  
43  
44 not consistently provided. (17) While diet is clearly a factor in the development of gout  
45  
46 (18), patients and physicians frequently place a disproportionate emphasis on dietary  
47  
48 restrictions. (19) Although consensus guidelines recommend treating with ULT to a  
49  
50 target sUA of 6.0 mg/dl or less, concerns about allopurinol toxicity may discourage some  
51  
52  
53  
54  
55  
56  
57  
58  
59  
60

1  
2  
3 physicians from achieving this goal. In particular, limiting doses of allopurinol in patients  
4 with CKD lead to a high percentage of treatment failures (20). Finally, many clinical  
5 laboratories do not correctly identify serum urate concentrations of > 6.8 mg/dl as being  
6 abnormal. This leads to under-treatment and considerable confusion about diagnosis and  
7 management. (21)  
8  
9  
10  
11  
12  
13

14  
15  
16  
17 Our pilot program was conceived as a way to re-frame the approach to gout management.  
18 We hypothesized that using a structured treat-to-target approach with regular monitoring  
19 and a goal-directed intervention would result in a high percentage of patients achieving a  
20 target sUA. In particular, the protocol was designed to use a slow titration of ULT along  
21 with flare prophylaxis and scheduled follow up calls. We also required sustained control  
22 of sUA for at least 3 months as a way to promote longer term medication adherence. We  
23 realize that maintaining treatment for 3 months does not guarantee long term control of  
24 sUA. Nevertheless, of the patients for whom a follow up test was available, 80% were  
25 still at target a mean of 36.8 weeks after clinic discharge. As for any chronic condition,  
26 optimal outcomes will require some level of structured monitoring.  
27  
28  
29  
30  
31  
32  
33  
34  
35  
36  
37  
38  
39  
40  
41  
42

43 The results of our pilot program suggest that a structured program may be an effective  
44 approach to gout management. ULT medications are highly effective, and therefore  
45 almost all our patients responded with significant reductions in sUA within weeks of  
46 starting the program (Figure 4). Dose titration allowed most patients to achieve a target  
47 sUA of  $\leq 6.0$  mg/dl and to-date, all patients have been able to achieve goal using standard  
48 doses of available medications. The demographic and clinical features of the patients in  
49  
50  
51  
52  
53  
54  
55  
56  
57  
58  
59  
60



1  
2  
3 our gout sample were similar to those seen in the general population of gout patients  
4 described in previous studies, (22) suggesting that our findings should be generalizable to  
5 gout populations outside KPNC. A nurse-staffed case management approach has been  
6 used and achieved impressive results in controlling sUA in gout patients (23). Our pilot  
7 program is also based on a structured management approach, but did not require any  
8 clinic visits. This model is highly efficient and therefore suitable for managing a large  
9 population of gout patients, but not necessarily more effective than a case management  
10 approach.  
11  
12  
13  
14  
15  
16  
17  
18  
19  
20  
21  
22  
23

24 There is ample evidence that therapeutic inertia contributes to inadequate results of ULT  
25 (24). Our program was designed specifically to counter this problem by including  
26 repeated sUA measurements and specified actions based on the results. In addition, our  
27 protocol did not limit doses of allopurinol specifically based on renal function, which has  
28 been one of several impediments noted in the literature to successful ULT. Current  
29 recommendations do not support the need to limit allopurinol doses to 100 mg daily in  
30 patients with CKD, (25–27) though a low starting dose and slow titration is  
31 recommended. (26,28) Indeed, limiting the dose of allopurinol based on the presence of  
32 chronic kidney disease has been shown to result in treatment failure in an unacceptably  
33 high percentage of patients. (17) Our data confirm this observation: only three of 68  
34 allopurinol-treated patients (4%) completing the program achieved a sUA of  $\leq 6.0$  on  
35 100 mg daily of allopurinol, and only 68% achieved target with 300 mg daily (Figure 5).  
36  
37  
38  
39  
40  
41  
42  
43  
44  
45  
46  
47  
48  
49  
50  
51  
52  
53  
54

55 Not surprisingly, we encountered many cases of medication non-adherence. In most  
56  
57  
58  
59  
60

1  
2  
3 cases, this was detected in the course of the routine testing that comprised the protocol.  
4  
5 Typically a patient whose sUA was at or near target, had a repeat test that was no longer  
6  
7 at target. In some cases, non-adherence was discovered at the time the patient called to  
8  
9 pharmacist because of a gout flare. Our protocol, by requiring two consecutive target  
10  
11 sUA levels three months apart, was designed with the expectation that adherence to ULT  
12  
13 would be inconsistent. As noted previously, we do not know whether our time-limited  
14  
15 intervention will ultimately lead to long-term control of sUA in these patients, but we  
16  
17 were able to detect medication non-adherence in the first few months and thus reinforce  
18  
19 the importance of long-term ULT. Ideally, monitoring of sUA would continue on a  
20  
21 regular basis, as recommended for relevant laboratory parameters in other chronic  
22  
23 conditions. Despite the fact that all patients were prescribed colchicine or NSAIDs for  
24  
25 flare prophylaxis, we encountered a substantial number of gout flares during the program.  
26  
27 While some increase in flares may be expected, in our experience, many of the flares in  
28  
29 our patients occurred in connection with medication non-adherence. This tendency of  
30  
31 gout patients to discontinue ULT accounted for the wide range of times patients had to  
32  
33 stay under management. We provided our patients with written educational material as  
34  
35 well, but could not evaluate the effectiveness of this.  
36  
37  
38  
39  
40  
41  
42  
43  
44  
45

46 We designed our pilot to be efficient and cost-effective by leveraging physician time.  
47  
48 The gout management program, while supervised by a rheumatologist, was staffed by a  
49  
50 clinical pharmacist who was carefully trained in the management protocol. The  
51  
52 pharmacist was able to manage a cohort of up to about 80 patients at a time while  
53  
54 spending only about 6-8 hours per week. The time spent in overseeing and assisting the  
55  
56  
57  
58  
59  
60

1  
2  
3 clinical pharmacist was never more than about 30 minutes per week for the  
4  
5  
6 rheumatologist once the program was in place. Moreover, our program did not require  
7  
8 any in-person visits. This model suggests a path to improved outcomes in gout patients  
9  
10 without generating the magnitude of increased utilization of health care resources that  
11  
12 might otherwise be required. We recognize that pharmacists may not be available or  
13  
14 allowed to manage patients as was done in our protocol. Even so, a trained clinical nurse  
15  
16 could be substituted in the pharmacist's role and provide excellent care while leveraging  
17  
18 physician time.  
19  
20  
21  
22  
23  
24  
25  
26  
27  
28  
29  
30  
31  
32  
33  
34  
35  
36  
37  
38  
39  
40  
41  
42  
43  
44  
45  
46  
47  
48  
49  
50  
51  
52  
53  
54  
55  
56  
57  
58  
59  
60

## Contributorship Statement

### Robert Goldfien

Conceived and developed protocol and program. Participated in collection and analysis of data, and pharmacist supervision. Primary author of manuscript.

### Andrew Avins

Consulted on project design, data capture, statistical methods and manuscript editing.

### Alice Pressman

Oversaw data analysis and presentation. Consulted on data analysis and manuscript editing.

### Alice Hwe

Oversaw development and approval of treatment protocol and supervised clinical pharmacists.

### Alice Jacobson

Assisted with data collection and analysis.

### Michele Ng and Goldie Yip

Worked directly with subjects to arrange data collection, adjust medications, obtain clinical information and report issues or concerns with supervising rheumatologist

## Data sharing

There are no additional unpublished data from this study.

## Funding

This work was funded through a Kaiser Permanente Community Benefits Research Grant

None of the authors has any potential conflict of interest regarding this work

There is no additional data available.

## Competing Interests

None.

## References

1. Lawrence RC, Felson DT, Helmick CG, et al. Estimates of the prevalence of arthritis and other rheumatic conditions in the United States: Part II. *Arthritis & Rheumatism*. 2008 Jan;58(1):26–35.
2. Krishnan E, Lienesch D, Kwoh CK. Gout in ambulatory care settings in the United States. *The Journal of Rheumatology*. 2008 Mar 1;35(3):498–501.
3. Wallace, KL, Riedel, AA, Joseph-Ridge, N, et al. Increasing prevalence of gout and hyperuricemia over 10 years among older adults in a managed care population. *The Journal of Rheumatology*. 31(8):1582–6.
4. Arromdee E, Michet CJ, Crowson CS, et al. Epidemiology of gout: is the incidence rising? *J. Rheumatol*. 2002 Nov;29(11):2403–6.
5. Kramer, HN, Curhan, G. The association between gout and nephrolithiasis: The National Health and Nutrition Examination Survey III. *American Journal of Kidney Diseases*. 40:37–42.
6. Weaver, AL. Epidemiology of gout. *Cleveland Clinic Journal of Medicine*. 2008 Jul;75(Supplement 5):9–12.
7. Annemans, L, Spaepen, E, Gaskin, M et al. Gout in the UK and Germany: prevalence, comorbidities and management in general practice 2000–2005. *Annals of the Rheumatic Diseases*. 2008;67:960–6.
8. Peters AL, Davidson MB. Application of a diabetes managed care program. The feasibility of using nurses and a computer system to provide effective care. *Diabetes Care*. 1998 Jul;21(7):1037–43.
9. Zhang W. EULAR evidence based recommendations for gout. Part II: Management. Report of a task force of the EULAR Standing Committee For International Clinical Studies Including Therapeutics (ESCISIT). *Annals of the Rheumatic Diseases*. 2006 Mar 28;65(10):1312–24.
10. Khanna D, Fitzgerald JD, Khanna PP, et al. 2012 American College of Rheumatology guidelines for management of gout. Part 1: Systematic nonpharmacologic and pharmacologic therapeutic approaches to hyperuricemia. *Arthritis Care & Research*. 2012 Oct;64(10):1431–46.
11. Edwards NL. Quality of Care in Patients with Gout: Why is Management Suboptimal and What Can Be Done About It? *Current Rheumatology Reports*. 2010 Dec 14;13(2):154–9.
12. Pascual, E, Sivera, F. Why is gout so poorly managed? *Annals of the Rheumatic Diseases*. 2007;66:1269–70.

13. Singh, JA, Hodges, JS, Toscano, JP, et al. Quality of care for gout in the US needs improvement. *Arthritis Care & Research*. 2007;57(5):822–9.
14. Becker, MA, Chohan, S. We can make gout management more successful now. *Current Opinion in Rheumatology*. 2008;20:167–72.
15. Briesacher BA, Andrade SE, Fouayzi H, et al. Comparison of Drug Adherence Rates Among Patients with Seven Different Medical Conditions. *Pharmacotherapy*. 2008 Apr;28(4):437–43.
16. Schumacher HR, Becker MA, Lloyd E, et al. Febuxostat in the treatment of gout: 5-yr findings of the FOCUS efficacy and safety study. *Rheumatology*. 2008 Nov 2;48(2):188–94.
17. Choi HK, Atkinson K, Karlson EW, et al. Purine-rich foods, dairy and protein intake, and the risk of gout in men. *N. Engl. J. Med*. 2004 Mar 11;350(11):1093–103.
18. Doherty M, Jansen TL, Nuki G, et al. Gout: why is this curable disease so seldom cured? *Annals of the Rheumatic Diseases*. 2012 Aug 3;71(11):1765–70.
19. Dalbeth N, Kumar S, Stamp L, et al. Dose adjustment of allopurinol according to creatinine clearance does not provide adequate control of hyperuricemia in patients with gout. *J. Rheumatol*. 2006 Aug;33(8):1646–50.
20. Mandell BF. Confessions of a goutophile: Despite its treatability, gout remains a problem. *Cleve Clin J Med*. 2008 Jul;75 Suppl 5:S1.
21. Kim KY, Ralph Schumacher H, Hunsche E, et al. A literature review of the epidemiology and treatment of acute gout. *Clin Ther*. 2003 Jun;25(6):1593–617.
22. Trifiro G, Morabito P, Cavagna L, et al. Epidemiology of gout and hyperuricaemia in Italy during the years 2005-2009: a nationwide population-based study. *Annals of the Rheumatic Diseases*. 2012 Jun 26;72(5):694–700.
23. Rees F, Jenkins W, Doherty M. Patients with gout adhere to curative treatment if informed appropriately: proof-of-concept observational study. *Annals of the Rheumatic Diseases* [Internet]. 2012 Jun 7 [cited 2013 Apr 12]; Available from: <http://ard.bmj.com/cgi/doi/10.1136/annrhumdis-2012-201676>
24. Liote F, Choi H. Managing gout needs more than drugs: “Il faut le savoir-faire, l’Art et la maniere”. *Annals of the Rheumatic Diseases*. 2013 May 10;72(6):791–3.
25. Stamp LK, O’Donnell JL, Zhang M, et al. Using allopurinol above the dose based on creatinine clearance is effective and safe in patients with chronic gout, including those with renal impairment. *Arthritis & Rheumatism*. 2011 Feb;63(2):412–21.

- 1  
2  
3  
4  
5  
6  
7  
8  
9  
10  
11  
12  
13  
14  
15  
16  
17  
18  
19  
20  
21  
22  
23  
24  
25  
26  
27  
28  
29  
30  
31  
32  
33  
34  
35  
36  
37  
38  
39  
40  
41  
42  
43  
44  
45  
46  
47  
48  
49  
50  
51  
52  
53  
54  
55  
56  
57  
58  
59  
60
26. Chao J, Terkeltaub R. A critical reappraisal of allopurinol dosing, safety, and efficacy for hyperuricemia in gout. *Current Rheumatology Reports*. 2009 Mar 22;11(2):135–40.
  27. Kim SC, Newcomb C, Margolis D, et al. Severe Cutaneous Reactions Requiring Hospitalization in Allopurinol Initiators: A Population-Based Cohort Study. *Arthritis Care & Research*. 2013 Apr;65(4):578–84.
  28. Dalbeth N, Stamp L. Allopurinol Dosing in Renal Impairment: Walking the Tightrope Between Adequate Urate Lowering and Adverse Events. *Seminars in Dialysis*. 2007 Apr 17;20(5):391–5.

## Figures

Fig. 1 Clinic monitoring and treatment flow diagram

Fig. 2 Current status of first 100 patients referred to program

Fig. 3 Comparison of pre-treatment sUA and most recent or final sUA. Each patient is represented by a red bar (initial sUA) and a blue bar (final sUA, whether or not he/she completed the program).

Fig. 4 sUA trend lines for 20 randomly selected patients. Each colored line represents sequential sUA levels in a single patient. Each line stops at the time of clinic discharge or is the most recent sUA if the patient had not completed or left the program.

Fig. 5 Dose of Allopurinol required to achieve a sUA of  $\leq 6.0$  mg/dl



1  
2  
3 **Effectiveness of a pharmacist-based gout care management program in a large**  
4  
5 **integrated health plan: Results from a pilot study**  
6  
7  
8  
9

10  
11  
12 Robert D Goldfien<sup>1</sup>, Michele S Ng<sup>2</sup>, Goldie Yip<sup>2</sup>, Alice Hwe<sup>2</sup>, Alice Jacobson<sup>3</sup>, Alice  
13 Pressman<sup>3</sup>, Andrew L Avins<sup>3</sup>  
14  
15  
16  
17  
18  
19  
20  
21

22 <sup>1</sup>Department of Rheumatology, Kaiser Permanente, Richmond, CA USA, <sup>2</sup>Department of  
23 Clinical Pharmacy, and the <sup>3</sup>Division of Research, Kaiser Permanente Oakland, CA  
24  
25  
26  
27  
28  
29  
30  
31

32 Correspondence to:  
33  
34  
35

36 Robert Goldfien, MD  
37

38 Department of Rheumatology  
39

40 Kaiser Permanente Northern California  
41

42 901 Nevin Ave  
43  
44

45 Richmond, CA 94941 USA  
46  
47

48 This work was funded through a Kaiser Permanente Community Benefits Research Grant  
49

50 None of the authors has any potential conflict of interest regarding this work  
51

52 There is no additional data available  
53  
54  
55  
56  
57  
58  
59  
60

## Abstract

### Background:

The incidence of gout has been steadily rising. While effective treatments are available, treatment is often unsuccessful because current approaches to management lack a systematic approach. To address this shortcoming we tested a protocol-based, pharmacist-staffed intervention to manage patients with recurrent gout.

### Methods:

Patients in Kaiser Permanente, Northern California (KPNC) with recurrent gout were referred by their primary care physicians to a pharmacist-staffed gout management clinic supervised by a board-certified rheumatologist. The pharmacist used a protocol that employs standard gout medications to achieve and maintain a serum uric acid (sUA) level of 6.0 mg/dl or less. Results from the first 100 consecutive patients enrolled in this pilot program are reported here.

### Results:

In 95 evaluable patients enrolled in our pilot program, a sUA of 6.0 mg/dl or less was achieved and maintained in 78 patients with 4 still in the program to date. Five patients declined to participate after referral, and another 13 patients did not complete the program. (The majority of these were due to non-adherence.)

### Conclusions:

A structured pharmacist-staffed program can effectively and safely lower and maintain uric acid levels in a high percentage of patients with recurrent gout. This care model is simple to implement, efficient and warrants further validation in a clinical trial.

## Introduction

Gout is the most common inflammatory arthritis in men (1) and results in considerable morbidity and utilization of health care resources. (2) The past 30 years have witnessed a steady increase in the prevalence of gout. (3–5) The causes of this rise in gout prevalence appear to be linked to the increasing prevalence of obesity, diabetes, chronic renal disease and hypertension. (6,7) Unlike other common rheumatic diseases, the underlying cause of gout, chronic elevation of serum uric acid (sUA), is well understood.

Current approaches for management of other common chronic conditions, such as diabetes, are based on the principle that chronic illnesses are best managed by identifying predictors of optimal outcomes, setting treatment targets, and then monitoring for success in treating to the targets. (8) In the case of gout, an appropriate treatment target has been identified by expert panels sponsored by the European League Against Rheumatism (EULAR) (9) and the American College of Rheumatology (ACR). (10) Both recommend that patients with tophaceous or recurrent gout be treated with urate-lowering therapy (ULT) to a target sUA of < 6.0 mg/dl. Unfortunately, only a minority of gout patients receives appropriate treatment, including doses of ULT sufficient to achieve this target. (11) There are several reasons for this deficiency which have been addressed by other authors. (12,13). The reasons cited have included lack of appropriate monitoring, failure to treat to target and fear of escalation of ULT in some patients, particularly patients with chronic kidney disease. Taken together, it appears that there is a great need for improved approaches to the management of gout.

1  
2  
3  
4  
5  
6 To address the problem of inadequate management of gout, we developed a model for  
7  
8 gout management consisting of a 'virtual' clinic comprised of a clinical pharmacist under  
9  
10 the supervision of a board-certified rheumatologist. Following a written protocol, the  
11  
12 pharmacist initiates, adjusts and monitors the use of standard gout medications for  
13  
14 patients referred by their primary care physicians for recurrent or tophaceous gout.  
15  
16 Patients are followed by the clinic until they have 2 consecutive target sUA results at  
17  
18 least 3 months apart, and are then discharged back to their usual care. We report here the  
19  
20 results of a pilot program by presenting the outcomes of the first 100 patients referred to  
21  
22 the program. Though a limited intervention, our intent was to address some of the issues  
23  
24 identified in the literature and do it in a way that is highly leveraged and potentially  
25  
26 suitable for a large majority of patients with chronic gout who are currently not being  
27  
28 adequately managed.  
29  
30  
31  
32  
33  
34  
35

## 36 **Methods**

### 37 *Patient referral*

38  
39  
40  
41 Patients with gout whose primary care physicians practice at KPNC in Richmond, CA  
42  
43 were eligible for referral to the gout management program. Referral was at the discretion  
44  
45 of the primary care physician (sometimes in consultation with a rheumatologist), based  
46  
47 on a history of recurrent or tophaceous gout and the intent to use urate-lowering therapy  
48  
49 (ULT). Referring physicians were offered the choice of referring each patient for a  
50  
51 formal rheumatology consultation, or to the gout management program, supervised by the  
52  
53  
54  
55  
56  
57  
58  
59  
60

1  
2  
3 same rheumatologist (RG). The clinical pharmacist then telephoned the referred patients,  
4 introduced them to the protocol and, if they agreed to participate, entered them into the  
5 program. Patients consenting to treatment in the program were provided written  
6 educational material including dietary guidelines at the time of program entry. Patients  
7 with end stage renal disease were excluded from the program. The pharmacist, under a  
8 protocol approved by the Kaiser Permanente East Bay Pharmacy and Therapeutics  
9 Committee, was authorized to order relevant laboratory tests and initiate or change orders  
10 for the medications used to manage sUA, and for flare prophylaxis. For treatment of  
11 acute flares, medication orders were sometimes provided by the rheumatologist if outside  
12 the scope of the pharmacy protocol.  
13  
14  
15  
16  
17  
18  
19  
20  
21  
22  
23  
24  
25  
26  
27  
28

### 29 *Laboratory assessment and monitoring*

30  
31 Baseline laboratory assessment performed on all referred patients consisted of a sUA,  
32 alanine aminotransferase (ALT), estimated glomerular filtration rate (eGFR) and  
33 complete blood count (CBC). This same panel of laboratory tests was repeated as needed  
34 to monitor progress while the patient was enrolled in the gout management clinic.  
35  
36  
37  
38  
39  
40  
41  
42

### 43 *Treatment protocol*

44  
45 Figure 1 is a schematic diagram of the assessment and treatment protocol. Once entered  
46 into the program, baseline laboratory assessment was performed if not available within  
47 the prior month. If, at the time of referral, a patient was being treated for an acute flare of  
48 gout, this treatment was continued and completed. Once a baseline laboratory assessment  
49 was available, ULT was either initiated or adjusted if the sUA was above 6.0 mg/dl. Flare  
50  
51  
52  
53  
54  
55  
56  
57  
58  
59  
60

1  
2  
3 prophylaxis was used in all cases (see below). After any change in ULT, the patient was  
4  
5 instructed to return for laboratory assessment (sUA, ALT, CBC, eGFR) in 2 weeks, and  
6  
7 report any adverse drug reactions (ADRs) or gout symptoms. ADRs or gout flares were  
8  
9 managed by the clinical pharmacist, usually in consultation with the supervising  
10  
11 rheumatologist. This process was continued in an iterative fashion until a target sUA of  $\leq$   
12  
13 6.0 mg/dl was achieved. Patients at target were asked to repeat the laboratory assessment  
14  
15 in 3 months. At that time, patients still at target were discharged from the clinic and  
16  
17 instructed to continue their medications and follow up with their primary care physician.  
18  
19 Those not at target were either restarted on their ULT or it was titrated and the level re-  
20  
21 tested in 2 weeks. Patients remained in the gout management program until they  
22  
23 demonstrated 2 sUAs  $\leq$  6 mg/dl at least 3 months apart.  
24  
25  
26  
27  
28  
29  
30  
31

### 32 *Pharmacological treatments*

33  
34 ULT was initiated with allopurinol in all patients as first-line therapy unless the patient  
35  
36 had a known ADR or allergy to allopurinol. The starting dose for allopurinol-naïve  
37  
38 patients was 100 mg daily (some patients were on higher doses at the time of referral).  
39  
40 Dose titration for patients not at target sUA was done using 100 mg per day increments,  
41  
42 or in some cases, although selected patients on 300 mg daily were titrated to 450 mg  
43  
44 daily. The maximum allopurinol dose used in the program was 600 mg per day. Patients  
45  
46 already on febuxostat or probenecid were maintained on these and doses titrated as  
47  
48 needed based on sUA. Patients who developed a significant ADR or symptoms of  
49  
50 allergy to allopurinol were switched to either febuxostat 40 mg daily or probenecid 500  
51  
52  
53  
54  
55  
56  
57  
58  
59  
60

1  
2  
3 mg daily, depending on their clinical status in consultation with the rheumatologist. Dose  
4  
5 titration was then continued with these drugs if needed.  
6  
7  
8  
9

10 Gout-flare prophylaxis was used in all patients and in most instances we utilized  
11 colchicine 0.6 mg daily. For patients with eGFR less than 30, the dose was reduced to 0.3  
12 mg per day. In some patients, if recommended by the rheumatologist, a daily  
13 nonsteroidal anti-inflammatory drug (NSAID) treatment was substituted, if no  
14  
15  
16  
17  
18  
19  
20  
21  
22  
23  
24  
25  
26  
27  
28  
29  
30  
31  
32  
33  
34  
35  
36  
37  
38  
39  
40  
41  
42  
43  
44  
45  
46  
47  
48  
49  
50  
51  
52  
53  
54  
55  
56  
57  
58  
59  
60

Acute gout flares were managed by the clinical pharmacist, in consultation with the  
rheumatologist, using oral NSAIDS, prednisone or colchicine.

Adverse drug reactions (ADR) to medications, incident gout flares and abnormal  
laboratory parameters were recorded by the clinical pharmacist at each telephone  
encounter and reviewed by the rheumatologist for management.

## Results

Patient demographics and co morbidities of the pilot sample are described in Table 1.

Table 1. Demographic and clinical characteristics of patients (N=100)

| Characteristic | Mean (range) |
|----------------|--------------|
| Age, years     | 61 (32-94)   |

|                                  |            |
|----------------------------------|------------|
| BMI, kg/m <sup>2</sup>           | 31 (20-48) |
|                                  | Percent    |
| Male                             | 75%        |
| Hypertension                     | 75%        |
| Chronic kidney disease (CKD 2-4) | 29%        |
| Diabetes                         | 29%        |
| Coronary artery disease          | 10%        |
| Congestive heart failure         | 11%        |
| 2 or more co-morbidities         | 46%        |

Three-fourths of the patients were male. The mean age was 61 years, (range: 32 – 94 years). The mean body mass index was 31 kg/m<sup>2</sup> (range: 20 – 48 kg/m<sup>2</sup>). Common gout-associated co-morbidities were determined based on the presence of specific ICD-9 codes listed in the problem list of each patient in the electronic medical record, and verified by chart review. The majority of patients had at least one of the common co-morbidities associated with gout. Seventy-five percent had hypertension, and 29% had chronic kidney disease (CKD). Of these, 2 had stage 2 CKD, 22 had stage 3 CKD and 3 had stage 4 CKD. Another 29% had diabetes. A smaller number had either coronary artery disease or congestive heart failure. Forty-five percent of the patients had 2 or more of these co-morbid conditions.

Figure 2 is a schematic that shows the current status of the first 100 patients referred to our clinic. Five patients declined to participate when initially contacted by the pharmacist. Thus, 95 patients started the program, and at the time of this analysis, 78 had completed the program with 2 consecutive sUA measurements of < 6.0 mg/dl, and 4 were



1  
2  
3 still being managed. Thirteen patients left the program prior to achieving the end point.  
4  
5 Of these, 2 patients died while in the program. One died from complications of  
6  
7 abdominal surgery and the other, aged 94, died at home of “natural causes”. One patient  
8  
9 developed symptoms of an allergic reaction to allopurinol and declined further treatment.  
10  
11 One patient lost insurance coverage, and another was incarcerated. The remaining 8  
12  
13 patients were discharged by the program pharmacist because of a pattern of non-  
14  
15 adherence to treatment or lab monitoring, or because they elected not to complete the  
16  
17 program. The time patients spent under program management varied considerably. The  
18  
19 mean duration of participation was 47.8 weeks (range 14.9-109.6 weeks). Although our  
20  
21 program was a feasibility study and designed as a short term intervention, when we  
22  
23 examined the medical records of the 78 patients who have successfully completed the  
24  
25 program, we found that 63 of these had been tested at least one time by their regular  
26  
27 physician after clinic discharge (mean follow up time 36 weeks) and that 53 of these  
28  
29 (80%) still maintained a sUA of 6.0 or less.  
30  
31  
32  
33  
34  
35  
36  
37  
38

39 Figure 3 shows the sUA's of each patient in the pilot gout-management study as a set of  
40  
41 paired samples. Each pair of bars represents the baseline sUA (red bars) and final sUA  
42  
43 (blue bars) for each patient. For those patients still in the program (i.e., those who have  
44  
45 not yet achieved the discharge criterion of 2 consecutive sUA measurements of  $\leq 6.0$   
46  
47 mg/dl), the blue bar is the most recent sUA available if the patient did not complete the  
48  
49 program. The dotted horizontal line represents the sUA target of 6.0 mg/dl. The figure  
50  
51 shows all the patients who entered the program, including those who are still being  
52  
53 managed and those who did not complete the program.  
54  
55  
56  
57  
58  
59  
60

1  
2  
3  
4  
5  
6 To provide a more detailed view of how patients responded to management by the clinic,  
7  
8 we plotted sequential sUA levels in a subset of our patients. Figure 4 shows this analysis  
9  
10 in 20 randomly selected patients entering the program. Each line represents the  
11  
12 sequential sUA measurements of a single patient for a period of 12 months. Essentially  
13  
14 all the patients in this random sample initially responded with significant reduction in  
15  
16 sUA. In many patients, this improvement was sustained, but in others, the sUA  
17  
18 subsequently rose due to discontinuation of ULT. In these patients, the pharmacist was  
19  
20 able, in most cases, to restart ULT and continue testing to assure continuing medication  
21  
22 adherence. The Figure also shows that by 12 months in the program, 16 of the 20  
23  
24 patients had achieved a target sUA and two had a normal sUA of < 6.8 mg/dl.  
25  
26  
27  
28  
29  
30  
31

32 Analysis of the 78 patients who have completed the program after achieving and  
33  
34 maintaining the targeted sUA showed that 68 (87%, 95% CI: 78% to 94%) were on  
35  
36 allopurinol at discharge. Figure 5 shows the distribution of allopurinol doses required to  
37  
38 achieve a sUA of  $\leq 6.0$ . The mean daily allopurinol dose required to achieve a sUA of  $\leq$   
39  
40 6 was 311 mg. Sixty-eight percent of patients on allopurinol achieved target on 300 mg  
41  
42 per day or less. Only three patients achieved goal on the starting dose of 100 mg daily  
43  
44 and two patients required 600 mg per day. All five patients on febuxostat had achieved  
45  
46 the goal sUA level on 40 mg per day.  
47  
48  
49  
50  
51  
52

53 Three patients (3%) experienced rash or other symptoms of allergy to allopurinol. None  
54  
55 required more than discontinuation of the medication. Of these, two patients were  
56  
57  
58  
59  
60

1  
2  
3 changed to alternative ULT and one patient declined further treatment and discontinued  
4 the program. Elevation of ALT was seen at some time during treatment in 47 patients  
5 (48%), but only 7 of the patients had elevations high enough to require changing  
6 medication. Most stabilized or returned to normal with continued treatment and  
7 monitoring. Incident acute gout flares were reported in 33 patients (34%). None resulted  
8 in discontinuation of ULT. Gastrointestinal side effects were uncommon and in no case  
9 required a change in therapy.  
10  
11  
12  
13  
14  
15  
16  
17  
18  
19  
20  
21

## 22 Discussion

23  
24  
25  
26  
27 Gout is arguably the best understood of the common inflammatory arthritic diseases;  
28 effective preventive therapy is readily available and the key outcome (sUA < 6 mg/dl in  
29 most cases) is easily measured. Why, then, is unsuccessful control of sUA so frequent? A  
30 number of factors contribute to suboptimal gout management. (11,12,14) Adherence to  
31 ULT is poor when compared to medication adherence in other chronic conditions. (15)  
32 Symptoms are typically intermittent with extended gout-free periods. Moreover, there are  
33 effective treatments for gout flares, and medications (for example, colchicine) that can  
34 reduce the incidence of flares without lowering sUA. It is not surprising therefore, that  
35 many gout patients are never started on, or discontinue ULT. Another important feature  
36 of gout management is that initiation of ULT can lead to a short-term increase in  
37 incidence of gout flares, (16) further discouraging the continuation of therapy. Better  
38 patient education could be expected to improve long-term medication adherence, but is  
39 not consistently provided. (17) While diet is clearly a factor in the development of gout  
40  
41  
42  
43  
44  
45  
46  
47  
48  
49  
50  
51  
52  
53  
54  
55  
56  
57  
58  
59  
60

1  
2  
3 (18), patients and physicians frequently place a disproportionate emphasis on dietary  
4  
5 restrictions. (19) Although consensus guidelines recommend treating with ULT to a  
6  
7 target sUA of 6.0 mg/dl or less, concerns about allopurinol toxicity may discourage some  
8  
9 physicians from achieving this goal. In particular, limiting doses of allopurinol in patients  
10  
11 with CKD lead to a high percentage of treatment failures (20). Finally, many clinical  
12  
13 laboratories do not correctly identify serum urate concentrations of > 6.8 mg/dl as being  
14  
15 abnormal. This leads to under-treatment and considerable confusion about diagnosis and  
16  
17 management. (21)  
18  
19  
20  
21  
22  
23

24 Our pilot program was conceived as a way to re-frame the approach to gout management.  
25  
26 We hypothesized that using a structured treat-to-target approach with regular monitoring  
27  
28 and a goal-directed intervention would result in a high percentage of patients achieving a  
29  
30 target sUA. In particular, the protocol was designed to use a slow titration of ULT along  
31  
32 with flare prophylaxis and scheduled follow up calls. We also required sustained control  
33  
34 of sUA for at least 3 months as a way to promote longer term medication adherence. We  
35  
36 realize that maintaining treatment for 3 months does not guarantee long term control of  
37  
38 sUA. Nevertheless, of the patients for whom a follow up test was available, 80% were  
39  
40 still at target a mean of 36.8 weeks after clinic discharge. As for any chronic condition,  
41  
42 optimal outcomes will require some level of structured monitoring.  
43  
44  
45  
46  
47  
48  
49

50 The results of our pilot program suggest that a structured program may be an effective  
51  
52 approach to gout management. ULT medications are highly effective, and therefore  
53  
54 almost all our patients responded with significant reductions in sUA within weeks of  
55  
56  
57  
58  
59  
60

1  
2  
3 starting the program (Figure 4). Dose titration allowed most patients to achieve a target  
4  
5 sUA of  $\leq 6.0$  mg/dl and to-date, all patients have been able to achieve goal using standard  
6  
7 doses of available medications. The demographic and clinical features of the patients in  
8  
9 our gout sample were similar to those seen in the general population of gout patients  
10  
11 described in previous studies, (22) suggesting that our findings should be generalizable to  
12  
13 gout populations outside KPNC. A nurse-staffed case management approach has been  
14  
15 used and achieved impressive results in controlling sUA in gout patients (23). Our pilot  
16  
17 program is also based on a structured management approach, but did not require any  
18  
19 clinic visits. This model is highly efficient and therefore suitable for managing a large  
20  
21 population of gout patients, but not necessarily more effective than a case management  
22  
23 approach.  
24  
25  
26  
27  
28  
29  
30  
31

32 There is ample evidence that therapeutic inertia contributes to inadequate results of ULT  
33  
34 (24). Our program was designed specifically to counter this problem by including  
35  
36 repeated sUA measurements and specified actions based on the results. In addition, our  
37  
38 protocol did not limit doses of allopurinol specifically based on renal function, which has  
39  
40 been one of several impediments noted in the literature to successful ULT. Current  
41  
42 recommendations do not support the need to limit allopurinol doses to 100 mg daily in  
43  
44 patients with CKD, (25–27) though a low starting dose and slow titration is  
45  
46 recommended. (26,28) Indeed, limiting the dose of allopurinol based on the presence of  
47  
48 chronic kidney disease has been shown to result in treatment failure in an unacceptably  
49  
50 high percentage of patients. (17) Our data confirm this observation: only three of 68  
51  
52 allopurinol-treated patients (4%) completing the program achieved a sUA of  $\leq 6.0$  on  
53  
54  
55  
56  
57  
58  
59  
60

1  
2  
3 100 mg daily of allopurinol, and only 68% achieved target with 300 mg daily (Figure 5).  
4  
5  
6

7  
8 Not surprisingly, we encountered many cases of medication non-adherence. In most  
9  
10 cases, this was detected in the course of the routine testing that comprised the protocol.  
11  
12 Typically a patient whose sUA was at or near target, had a repeat test that was no longer  
13  
14 at target. In some cases, non-adherence was discovered at the time the patient called to  
15  
16 pharmacist because of a gout flare. Our protocol, by requiring two consecutive target  
17  
18 sUA levels three months apart, was designed with the expectation that adherence to ULT  
19  
20 would be inconsistent. As noted previously, we do not know whether our time-limited  
21  
22 intervention will ultimately lead to long-term control of sUA in these patients, but we  
23  
24 were able to detect medication non-adherence in the first few months and thus reinforce  
25  
26 the importance of long-term ULT. Ideally, monitoring of sUA would continue on a  
27  
28 regular basis, as recommended for relevant laboratory parameters in other chronic  
29  
30 conditions. Despite the fact that all patients were prescribed colchicine or NSAIDs for  
31  
32 flare prophylaxis, we encountered a substantial number of gout flares during the program.  
33  
34 While some increase in flares may be expected, in our experience, many of the flares in  
35  
36 our patients occurred in connection with medication non-adherence. This tendency of  
37  
38 gout patients to discontinue ULT accounted for the wide range of times patients had to  
39  
40 stay under management. We provided our patients with written educational material as  
41  
42 well, but could not evaluate the effectiveness of this.  
43  
44  
45  
46  
47  
48  
49  
50  
51  
52

53 We designed our pilot to be efficient and cost-effective by leveraging physician time.  
54

55 The gout management program, while supervised by a rheumatologist, was staffed by a  
56  
57  
58  
59  
60

1  
2  
3 clinical pharmacist who was carefully trained in the management protocol. The  
4  
5 pharmacist was able to manage a cohort of up to about 80 patients at a time while  
6  
7  
8 spending only about 6-8 hours per week. The time spent in overseeing and assisting the  
9  
10 clinical pharmacist was never more than about 30 minutes per week for the  
11  
12 rheumatologist once the program was in place. Moreover, our program did not require  
13  
14 any in-person visits. This model suggests a path to improved outcomes in gout patients  
15  
16 without generating the magnitude of increased utilization of health care resources that  
17  
18 might otherwise be required. We recognize that pharmacists may not be available or  
19  
20 allowed to manage patients as was done in our protocol. Even so, a trained clinical nurse  
21  
22 could be substituted in the pharmacist's role and provide excellent care while leveraging  
23  
24  
25  
26  
27 physician time.  
28  
29  
30  
31  
32  
33  
34  
35  
36  
37  
38  
39  
40  
41  
42  
43  
44  
45  
46  
47  
48  
49  
50  
51  
52  
53  
54  
55  
56  
57  
58  
59  
60

## References

1. Lawrence RC, Felson DT, Helmick CG, Arnold LM, Choi H, Deyo RA, et al. Estimates of the prevalence of arthritis and other rheumatic conditions in the United States: Part II. *Arthritis & Rheumatism*. 2008 Jan;58(1):26–35.
2. Krishnan E, Lienesch D, Kwok CK. Gout in ambulatory care settings in the United States. *The Journal of Rheumatology*. 2008 Mar 1;35(3):498–501.
3. Wallace, KL, Riedel, AA, Joseph-Ridge, N, Wortman, R. Increasing prevalence of gout and hyperuricemia over 10 years among older adults in a managed care population. *The Journal of Rheumatology*. 31(8):1582–6.
4. Arromdee E, Michet CJ, Crowson CS, O’Fallon WM, Gabriel SE. Epidemiology of gout: is the incidence rising? *J. Rheumatol*. 2002 Nov;29(11):2403–6.
5. Kramer, HN, Curhan, G. The association between gout and nephrolithiasis: The National Health and Nutrition Examination Survey III. *American Journal of Kidney Diseases*. 40:37–42.
6. Weaver, AL. Epidemiology of gout. *Cleveland Clinic Journal of Medicine*. 2008 Jul;75(Supplement 5):9–12.
7. Annemans, L, Spaepen, E, Gaskin, M et al. Gout in the UK and Germany: prevalence, comorbidities and management in general practice 2000–2005. *Annals of the Rheumatic Diseases*. 2008;67:960–6.
8. Peters AL, Davidson MB. Application of a diabetes managed care program. The feasibility of using nurses and a computer system to provide effective care. *Diabetes Care*. 1998 Jul;21(7):1037–43.
9. Zhang W. EULAR evidence based recommendations for gout. Part II: Management. Report of a task force of the EULAR Standing Committee For International Clinical Studies Including Therapeutics (ESCISIT). *Annals of the Rheumatic Diseases*. 2006 Mar 28;65(10):1312–24.
10. Khanna D, Fitzgerald JD, Khanna PP, Bae S, Singh MK, Neogi T, et al. 2012 American College of Rheumatology guidelines for management of gout. Part 1: Systematic nonpharmacologic and pharmacologic therapeutic approaches to hyperuricemia. *Arthritis Care & Research*. 2012 Oct;64(10):1431–46.
11. Edwards NL. Quality of Care in Patients with Gout: Why is Management Suboptimal and What Can Be Done About It? *Current Rheumatology Reports*. 2010 Dec 14;13(2):154–9.
12. Pascual, E, Sivera, F. Why is gout so poorly managed? *Annals of the Rheumatic Diseases*. 2007;66:1269–70.



13. Singh, JA, Hodges, JS, Toscano, JP, Asch, SM. Quality of care for gout in the US needs improvement. *Arthritis Care & Research*. 2007;57(5):822–9.
14. Becker, MA, Chohan, S. We can make gout management more successful now. *Current Opinion in Rheumatology*. 2008;20:167–72.
15. Briesacher BA, Andrade SE, Fouayzi H, Chan KA. Comparison of Drug Adherence Rates Among Patients with Seven Different Medical Conditions. *Pharmacotherapy*. 2008 Apr;28(4):437–43.
16. Schumacher HR, Becker MA, Lloyd E, MacDonald PA, Lademacher C. Febuxostat in the treatment of gout: 5-yr findings of the FOCUS efficacy and safety study. *Rheumatology*. 2008 Nov 2;48(2):188–94.
17. Choi HK, Atkinson K, Karlson EW, Willett W, Curhan G. Purine-rich foods, dairy and protein intake, and the risk of gout in men. *N. Engl. J. Med*. 2004 Mar 11;350(11):1093–103.
18. Doherty M, Jansen TL, Nuki G, Pascual E, Perez-Ruiz F, Punzi L, et al. Gout: why is this curable disease so seldom cured? *Annals of the Rheumatic Diseases*. 2012 Aug 3;71(11):1765–70.
19. Dalbeth N, Kumar S, Stamp L, Gow P. Dose adjustment of allopurinol according to creatinine clearance does not provide adequate control of hyperuricemia in patients with gout. *J. Rheumatol*. 2006 Aug;33(8):1646–50.
20. Mandell BF. Confessions of a goutophile: Despite its treatability, gout remains a problem. *Cleve Clin J Med*. 2008 Jul;75 Suppl 5:S1.
21. Kim KY, Ralph Schumacher H, Hunsche E, Wertheimer AI, Kong SX. A literature review of the epidemiology and treatment of acute gout. *Clin Ther*. 2003 Jun;25(6):1593–617.
22. Trifiro G, Morabito P, Cavagna L, Ferrajolo C, Pecchioli S, Simonetti M, et al. Epidemiology of gout and hyperuricaemia in Italy during the years 2005-2009: a nationwide population-based study. *Annals of the Rheumatic Diseases*. 2012 Jun 26;72(5):694–700.
23. Rees F, Jenkins W, Doherty M. Patients with gout adhere to curative treatment if informed appropriately: proof-of-concept observational study. *Annals of the Rheumatic Diseases* [Internet]. 2012 Jun 7 [cited 2013 Apr 12]; Available from: <http://ard.bmj.com/cgi/doi/10.1136/annrhumdis-2012-201676>
24. Liote F, Choi H. Managing gout needs more than drugs: “Il faut le savoir-faire, l’Art et la maniere”. *Annals of the Rheumatic Diseases*. 2013 May 10;72(6):791–3.
25. Stamp LK, O’Donnell JL, Zhang M, James J, Frampton C, Barclay ML, et al. Using allopurinol above the dose based on creatinine clearance is effective and safe in

1  
2  
3 patients with chronic gout, including those with renal impairment. *Arthritis &*  
4 *Rheumatism*. 2011 Feb;63(2):412–21.  
5

- 6  
7 26. Chao J, Terkeltaub R. A critical reappraisal of allopurinol dosing, safety, and  
8 efficacy for hyperuricemia in gout. *Current Rheumatology Reports*. 2009 Mar  
9 22;11(2):135–40.  
10  
11 27. Kim SC, Newcomb C, Margolis D, Roy J, Hennessy S. Severe Cutaneous Reactions  
12 Requiring Hospitalization in Allopurinol Initiators: A Population-Based Cohort  
13 Study. *Arthritis Care & Research*. 2013 Apr;65(4):578–84.  
14  
15 28. Dalbeth N, Stamp L. Allopurinol Dosing in Renal Impairment: Walking the  
16 Tightrope Between Adequate Urate Lowering and Adverse Events. *Seminars in*  
17 *Dialysis*. 2007 Apr 17;20(5):391–5.  
18  
19  
20  
21  
22  
23  
24  
25  
26  
27  
28  
29  
30  
31  
32  
33  
34  
35  
36  
37  
38  
39  
40  
41  
42  
43  
44  
45  
46  
47  
48  
49  
50  
51  
52  
53  
54  
55  
56  
57  
58  
59  
60

Figures

Fig. 1 Clinic monitoring and treatment flow diagram



Fig. 2 Current status of first 100 patients referred to program

1  
2  
3  
4  
5  
6  
7  
8  
9  
10  
11  
12  
13  
14  
15  
16  
17  
18  
19  
20  
21  
22  
23  
24  
25  
26  
27  
28  
29  
30  
31  
32  
33  
34  
35  
36  
37  
38  
39  
40  
41  
42  
43  
44  
45  
46  
47  
48  
49  
50  
51  
52  
53  
54  
55  
56  
57  
58  
59  
60

# Current Patient Status

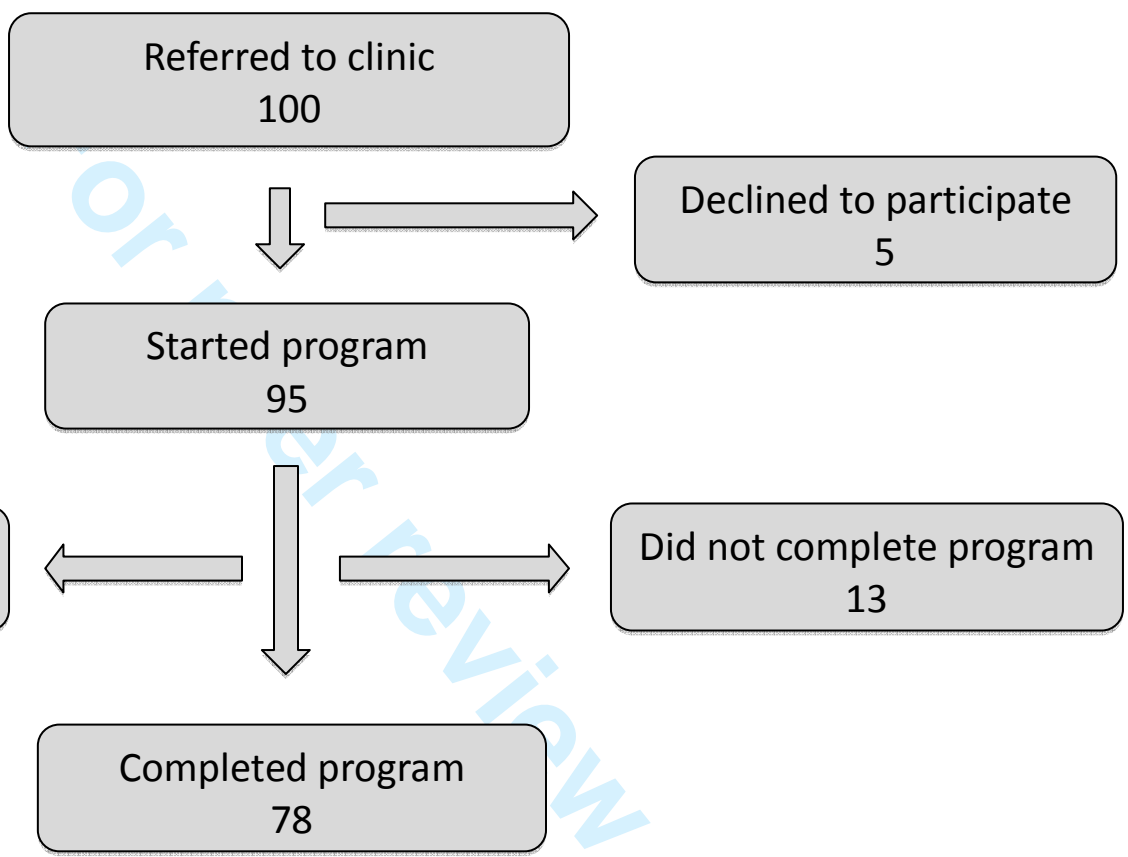

Fig. 3 Comparison of pre-treatment sUA and most recent or final sUA. Each patient is represented by a red bar (initial sUA) and a blue bar (final sUA, whether or not he/she completed the program).

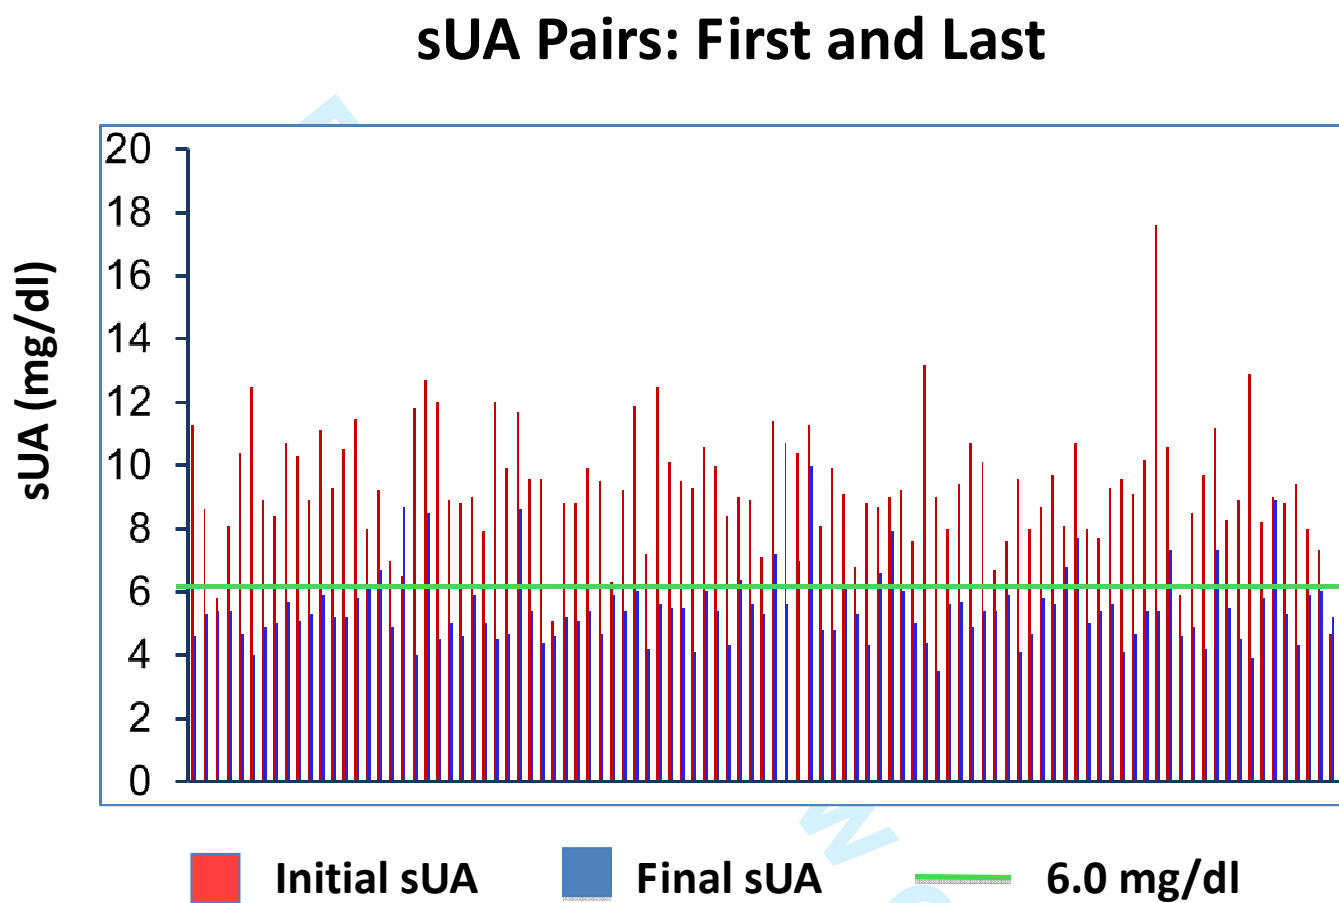

Fig. 4 sUA trend lines for 20 randomly selected patients. Each colored line represents sequential sUA levels in a single patient. Each line stops at the time of clinic discharge or is the most recent sUA if the patient had not completed or left the program.

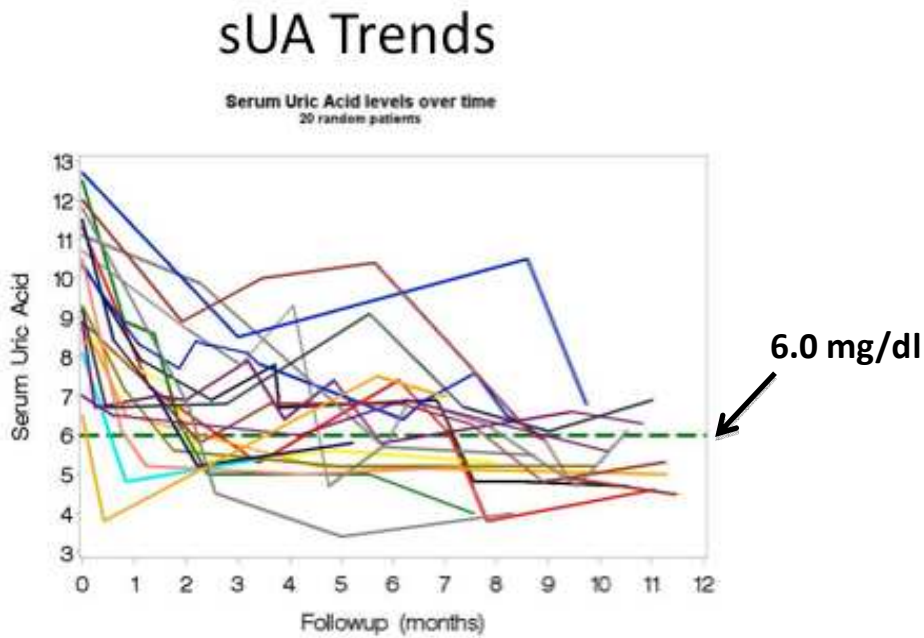

ew only

Fig. 5 Dose of Allopurinol required to achieve a sUA of  $\leq 6.0$  mg/dl



1  
2  
3  
4  
5  
6  
7  
8  
9  
10  
11  
12  
13  
14  
15  
16  
17  
18  
19  
20  
21  
22  
23  
24  
25  
26  
27  
28  
29  
30  
31  
32  
33  
34  
35  
36  
37  
38  
39  
40  
41  
42  
43  
44  
45  
46  
47  
48  
49  
50  
51  
52  
53  
54  
55  
56  
57  
58  
59  
60

# Treatment Protocol

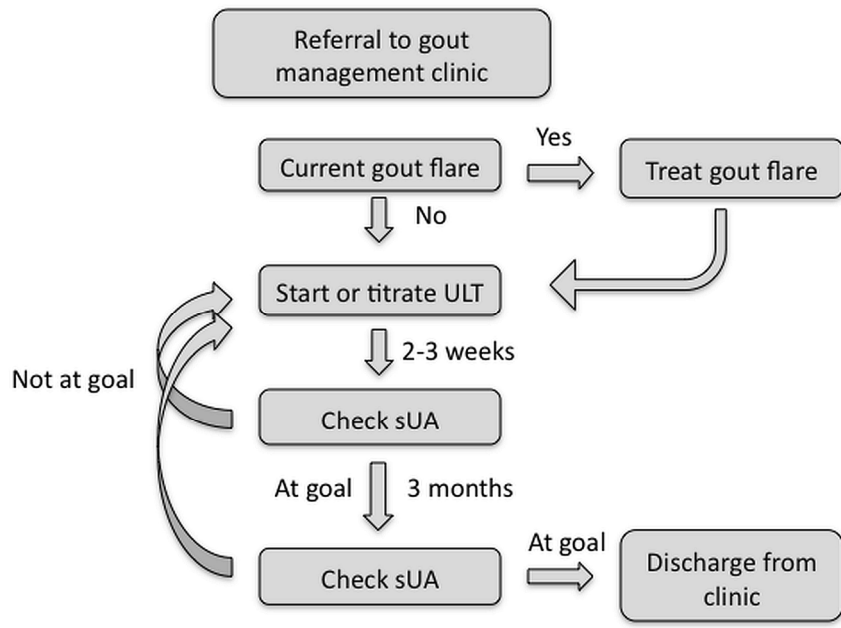

Review only



1  
2  
3  
4  
5  
6  
7  
8  
9  
10  
11  
12  
13  
14  
15  
16  
17  
18  
19  
20  
21  
22  
23  
24  
25  
26  
27  
28  
29  
30  
31  
32  
33  
34  
35  
36  
37  
38  
39  
40  
41  
42  
43  
44  
45  
46  
47  
48  
49  
50  
51  
52  
53  
54  
55  
56  
57  
58  
59  
60

### Current Patient Status

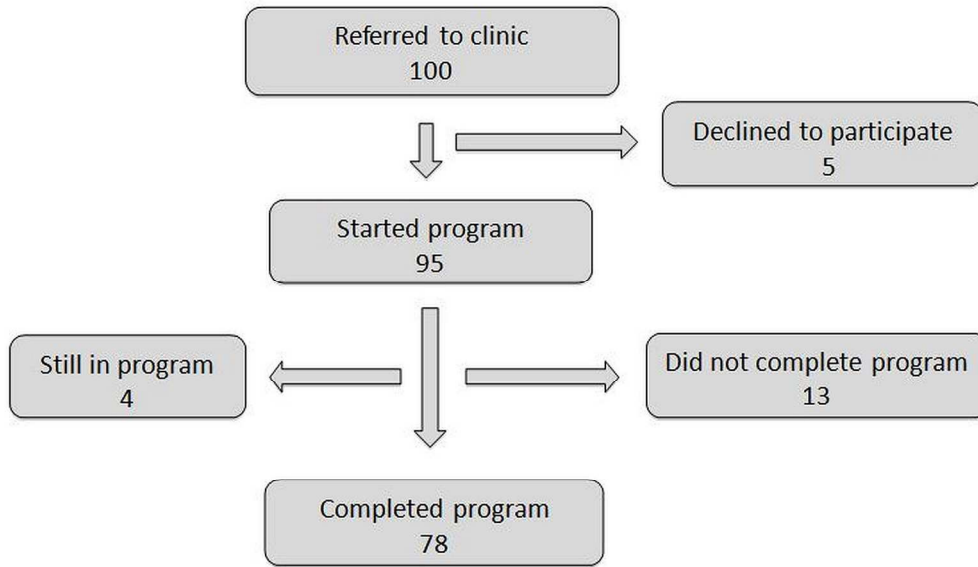

198x138mm (300 x 300 DPI)

view only

1  
2  
3  
4  
5  
6  
7  
8  
9  
10  
11  
12  
13  
14  
15  
16  
17  
18  
19  
20  
21  
22  
23  
24  
25  
26  
27  
28  
29  
30  
31  
32  
33  
34  
35  
36  
37  
38  
39  
40  
41  
42  
43  
44  
45  
46  
47  
48  
49  
50  
51  
52  
53  
54  
55  
56  
57  
58  
59  
60

### sUA Pairs: First and Last

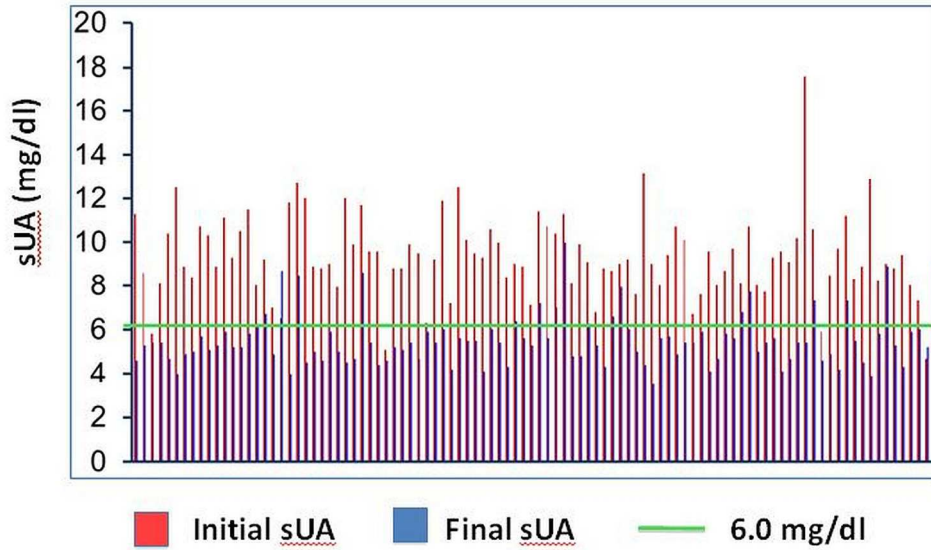

190x134mm (300 x 300 DPI)

view only

1  
2  
3  
4  
5  
6  
7  
8  
9  
10  
11  
12  
13  
14  
15  
16  
17  
18  
19  
20  
21  
22  
23  
24  
25  
26  
27  
28  
29  
30  
31  
32  
33  
34  
35  
36  
37  
38  
39  
40  
41  
42  
43  
44  
45  
46  
47  
48  
49  
50  
51  
52  
53  
54  
55  
56  
57  
58  
59  
60

# sUA Trends

Serum Uric Acid levels over time  
20 random patients

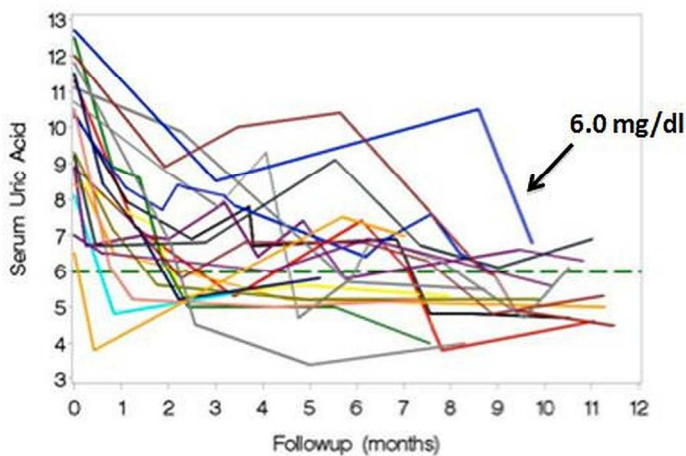

174x134mm (300 x 300 DPI)

ew only

1  
2  
3  
4  
5  
6  
7  
8  
9  
10  
11  
12  
13  
14  
15  
16  
17  
18  
19  
20  
21  
22  
23  
24  
25  
26  
27  
28  
29  
30  
31  
32  
33  
34  
35  
36  
37  
38  
39  
40  
41  
42  
43  
44  
45  
46  
47  
48  
49  
50  
51  
52  
53  
54  
55  
56  
57  
58  
59  
60

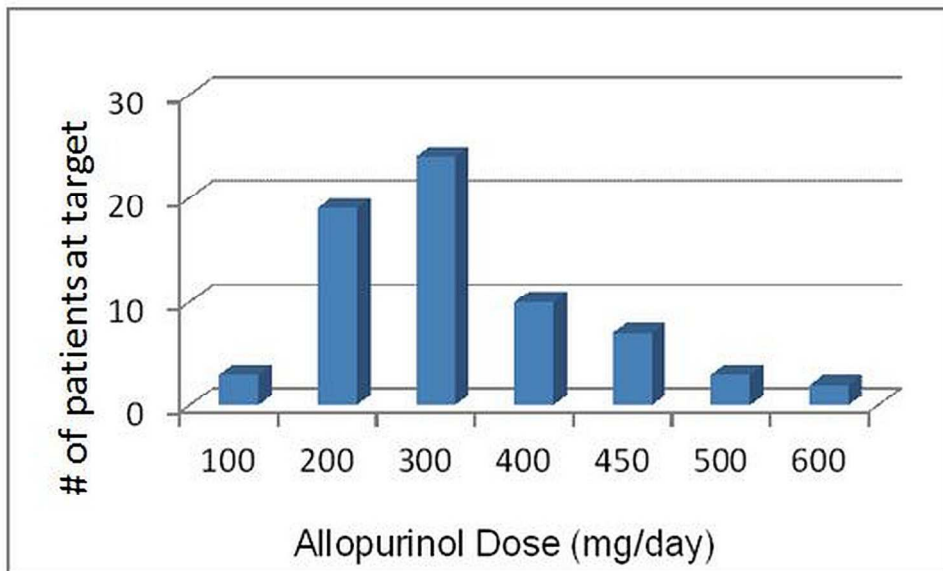

149x88mm (300 x 300 DPI)

review only
